# Supplementary material for: Hibernation slows epigenetic aging in yellow-bellied marmots
Source: Research Square preprint supplement (doi:10.21203/rs.3.rs-526409/v1), 2021-05-21
Supplement: Supplementary file 1 [file 0ffda253e17fe7025f151005.xls]

## Sheet: Enrichment_AGE
Database	ID	name	Hyper_Total_Regions	Hyper_Expected	Hyper_Foreground_Region_Hits	Hyper_Fold_Enrichment	Hyper_Region_Set_Coverage	Hyper_Term_Region_Coverage	Hyper_Foreground_Gene_Hits	Hyper_Background_Gene_Hits	Total_Genes_Annotated	Hyper_Raw_PValue	Hyper_Adjp_BH
GO Molecular Function	GO:0043565	sequence-specific DNA binding	2186	434.425	745	1.71491	0.190342	0.340805	150	278	697	3.05213e-62	1.12563e-58
GO Molecular Function	GO:0003700	sequence-specific DNA binding transcription factor activity	2769	550.285	839	1.52466	0.214359	0.302997	199	392	1034	7.47954e-46	1.37923e-42
GO Molecular Function	GO:0001071	nucleic acid binding transcription factor activity	2774	551.279	839	1.52192	0.214359	0.302451	199	393	1035	1.66949e-45	2.05236e-42
GO Molecular Function	GO:0003677	DNA binding	4076	810.026	1110	1.37033	0.283597	0.272326	297	690	2381	5.81163e-38	5.35832e-35
GO Molecular Function	GO:0003676	nucleic acid binding	5055	1004.58	1278	1.27217	0.32652	0.252819	377	956	3397	3.4766e-28	2.56434e-25
GO Molecular Function	GO:0044212	transcription regulatory region DNA binding	1123	223.174	372	1.66686	0.0950434	0.331256	73	149	360	3.00794e-27	1.61612e-24
GO Molecular Function	GO:0000975	regulatory region DNA binding	1127	223.969	373	1.66541	0.0952989	0.330967	74	151	367	3.06747e-27	1.61612e-24
GO Molecular Function	GO:0000976	transcription regulatory region sequence-specific DNA binding	585	116.257	227	1.95256	0.0579969	0.388034	32	67	168	6.29983e-27	2.90422e-24
GO Molecular Function	GO:0000979	RNA polymerase II core promoter sequence-specific DNA binding	193	38.355	101	2.63329	0.0258048	0.523316	7	12	27	7.50066e-24	3.0736e-21
GO Molecular Function	GO:0001046	core promoter sequence-specific DNA binding	202	40.1436	101	2.51597	0.0258048	0.5	7	14	39	6.70914e-22	2.47433e-19
GO Molecular Function	GO:0000981	sequence-specific DNA binding RNA polymerase II transcription factor activity	875	173.889	291	1.67348	0.0743485	0.332571	50	107	273	1.07206e-21	3.59433e-19
GO Molecular Function	GO:1901363	heterocyclic compound binding	6070	1206.3	1453	1.20452	0.371231	0.239374	502	1384	5300	2.59917e-21	7.98811e-19
GO Molecular Function	GO:0097159	organic cyclic compound binding	6125	1217.22	1462	1.20109	0.373531	0.238694	505	1400	5373	6.31674e-21	1.79201e-18
GO Molecular Function	GO:0001012	RNA polymerase II regulatory region DNA binding	363	72.1392	145	2.01	0.0370465	0.399449	18	45	103	6.1831e-19	1.6288e-16
GO Molecular Function	GO:0000977	RNA polymerase II regulatory region sequence-specific DNA binding	361	71.7418	144	2.0072	0.036791	0.398892	17	44	99	9.48775e-19	2.33272e-16
GO Molecular Function	GO:0001047	core promoter binding	239	47.4966	102	2.14752	0.0260603	0.426778	8	25	62	5.64017e-16	1.30006e-13
GO Molecular Function	GO:0071837	HMG box domain binding	186	36.9639	82	2.21838	0.0209504	0.44086	7	11	19	4.61693e-14	1.0016e-11
GO Molecular Function	GO:0003690	double-stranded DNA binding	241	47.8941	98	2.04618	0.0250383	0.406639	19	38	124	8.24502e-14	1.68931e-11
GO Molecular Function	GO:0001105	RNA polymerase II transcription coactivator activity	108	21.4629	53	2.46938	0.0135411	0.490741	5	9	22	9.11536e-12	1.76934e-09
GO Molecular Function	GO:0035035	histone acetyltransferase binding	66	13.1162	38	2.89718	0.00970874	0.575758	2	4	17	1.64066e-11	3.02539e-09
GO Molecular Function	GO:0001159	core promoter proximal region DNA binding	254	50.4776	96	1.90183	0.0245273	0.377953	11	23	50	2.29672e-11	4.03347e-09
GO Molecular Function	GO:0001077	RNA polymerase II core promoter proximal region sequence-specific DNA binding transcription factor activity involved in positive regulation of transcription	318	63.1963	112	1.77225	0.0286152	0.352201	17	35	74	8.84052e-11	1.48199e-08
GO Molecular Function	GO:0001228	RNA polymerase II transcription regulatory region sequence-specific DNA binding transcription factor activity involved in positive regulation of transcription	332	65.9786	115	1.74299	0.0293817	0.346385	18	40	81	1.60595e-10	2.57511e-08
GO Molecular Function	GO:0001972	retinoic acid binding	39	7.75049	26	3.35462	0.00664282	0.666667	2	2	15	2.79129e-10	4.11771e-08
GO Molecular Function	GO:0005501	retinoid binding	39	7.75049	26	3.35462	0.00664282	0.666667	2	2	29	2.79129e-10	4.11771e-08
GO Molecular Function	GO:0001191	RNA polymerase II transcription factor binding transcription factor activity involved in negative regulation of transcription	157	31.2007	65	2.08329	0.0166071	0.414013	9	15	28	4.95622e-10	7.0302e-08
GO Molecular Function	GO:0070410	co-SMAD binding	81	16.0972	41	2.54703	0.0104752	0.506173	5	6	12	6.02545e-10	8.23032e-08
GO Molecular Function	GO:0001190	RNA polymerase II transcription factor binding transcription factor activity involved in positive regulation of transcription	122	24.2451	54	2.22725	0.0137966	0.442623	6	16	33	7.8607e-10	1.03537e-07
GO Molecular Function	GO:0046983	protein dimerization activity	1216	241.656	325	1.34488	0.0830353	0.26727	96	246	987	1.42341e-09	1.81018e-07
GO Molecular Function	GO:0001106	RNA polymerase II transcription corepressor activity	147	29.2134	61	2.08808	0.0155851	0.414966	8	13	19	1.50233e-09	1.84686e-07
GO Molecular Function	GO:0003680	AT DNA binding	72	14.3086	37	2.58586	0.00945325	0.513889	1	3	8	2.38657e-09	2.83925e-07
GO Molecular Function	GO:0000982	RNA polymerase II core promoter proximal region sequence-specific DNA binding transcription factor activity	383	76.1138	123	1.616	0.0314256	0.321149	23	47	104	7.57315e-09	8.72806e-07
GO Molecular Function	GO:0003682	chromatin binding	840	166.934	233	1.39576	0.0595299	0.277381	59	148	360	1.26172e-08	1.41007e-06
GO Molecular Function	GO:0043027	cysteine-type endopeptidase inhibitor activity involved in apoptotic process	53	10.5327	29	2.75332	0.0074093	0.54717	3	4	20	2.01051e-08	2.18081e-06
GO Molecular Function	GO:0005488	binding	9636	1914.97	2069	1.08044	0.528615	0.214716	932	2874	12174	2.07484e-08	2.18629e-06
GO Molecular Function	GO:0043566	structure-specific DNA binding	371	73.7291	116	1.57333	0.0296372	0.312668	26	65	209	1.01975e-07	1.04468e-05
GO Molecular Function	GO:0005227	calcium activated cation channel activity	45	8.94288	25	2.79552	0.00638733	0.555556	3	6	23	1.27639e-07	1.21283e-05
GO Molecular Function	GO:0015269	calcium-activated potassium channel activity	45	8.94288	25	2.79552	0.00638733	0.555556	3	6	17	1.27639e-07	1.21283e-05
GO Molecular Function	GO:0001104	RNA polymerase II transcription cofactor activity	240	47.6953	82	1.71924	0.0209504	0.341667	14	32	73	1.28255e-07	1.21283e-05
GO Molecular Function	GO:0004869	cysteine-type endopeptidase inhibitor activity	57	11.3277	29	2.56011	0.0074093	0.508772	3	6	49	1.6725e-07	1.54205e-05
GO Molecular Function	GO:0042802	identical protein binding	1008	200.321	265	1.32288	0.0677057	0.262897	87	236	967	2.37839e-07	2.13939e-05
GO Molecular Function	GO:0046332	SMAD binding	213	42.3296	74	1.74818	0.0189065	0.347418	15	25	63	2.44932e-07	2.15074e-05
GO Molecular Function	GO:0043028	cysteine-type endopeptidase regulator activity involved in apoptotic process	59	11.7251	29	2.47332	0.0074093	0.491525	3	8	40	4.32193e-07	3.70681e-05
GO Molecular Function	GO:0003705	RNA polymerase II distal enhancer sequence-specific DNA binding transcription factor activity	269	53.4585	86	1.60872	0.0219724	0.319703	16	35	91	1.60158e-06	0.000134242
GO Molecular Function	GO:0001076	RNA polymerase II transcription factor binding transcription factor activity	309	61.4078	96	1.56332	0.0245273	0.31068	18	47	103	1.70174e-06	0.000139467
GO Molecular Function	GO:0000987	core promoter proximal region sequence-specific DNA binding	227	45.1119	74	1.64037	0.0189065	0.325991	10	22	49	3.77937e-06	0.000303007
GO Molecular Function	GO:0042803	protein homodimerization activity	769	152.824	203	1.32833	0.0518651	0.263979	58	150	577	4.66439e-06	0.000366006
GO Molecular Function	GO:0061135	endopeptidase regulator activity	95	18.8794	38	2.01277	0.00970874	0.4	11	22	166	5.03898e-06	0.000387162
GO Molecular Function	GO:0038023	signaling receptor activity	597	118.642	163	1.37388	0.0416454	0.273032	77	191	1276	5.35453e-06	0.00040301
GO Molecular Function	GO:0003707	steroid hormone receptor activity	161	31.9956	56	1.75024	0.0143076	0.347826	13	22	52	6.4795e-06	0.000477928
GO Molecular Function	GO:0004866	endopeptidase inhibitor activity	90	17.8858	36	2.01277	0.00919775	0.4	10	19	161	8.84581e-06	0.000637823
GO Molecular Function	GO:0030414	peptidase inhibitor activity	97	19.2769	38	1.97127	0.00970874	0.391753	11	23	167	8.99317e-06	0.000637823
GO Molecular Function	GO:0060072	large conductance calcium-activated potassium channel activity	7	1.39111	7	5.03194	0.00178845	1	1	1	2	1.21895e-05	0.000848205
GO Molecular Function	GO:0000989	transcription factor binding transcription factor activity	1242	246.823	306	1.23975	0.0781809	0.246377	79	193	515	1.28261e-05	0.000875955
GO Molecular Function	GO:0033293	monocarboxylic acid binding	61	12.1226	27	2.22725	0.00689831	0.442623	3	9	51	1.30633e-05	0.000875955
GO Molecular Function	GO:0015075	ion transmembrane transporter activity	564	112.084	153	1.36505	0.0390904	0.271277	68	186	765	1.49528e-05	0.000984746
GO Molecular Function	GO:0000988	protein binding transcription factor activity	1247	247.817	306	1.23478	0.0781809	0.245389	79	195	520	1.79743e-05	0.00116297
GO Molecular Function	GO:0016286	small conductance calcium-activated potassium channel activity	23	4.57081	14	3.06292	0.0035769	0.608696	1	2	4	1.92411e-05	0.00122347
GO Molecular Function	GO:0005216	ion channel activity	366	72.7354	105	1.44359	0.0268268	0.286885	45	113	370	2.85633e-05	0.00175569
GO Molecular Function	GO:0022838	substrate-specific channel activity	366	72.7354	105	1.44359	0.0268268	0.286885	45	113	378	2.85633e-05	0.00175569
GO Molecular Function	GO:0044323	retinoic acid-responsive element binding	44	8.74415	21	2.40161	0.00536536	0.477273	3	3	3	2.95444e-05	0.00178623
GO Molecular Function	GO:0035326	enhancer binding	161	31.9956	54	1.68773	0.0137966	0.335404	6	18	33	3.03436e-05	0.00180495
GO Molecular Function	GO:0061134	peptidase regulator activity	120	23.8477	43	1.80311	0.0109862	0.358333	14	36	201	3.25488e-05	0.0019054
GO Molecular Function	GO:0000983	RNA polymerase II core promoter sequence-specific DNA binding transcription factor activity	74	14.7061	30	2.03997	0.00766479	0.405405	3	5	10	3.56372e-05	0.00203729
GO Molecular Function	GO:0003712	transcription cofactor activity	1180	234.502	289	1.2324	0.0738375	0.244915	74	179	484	3.59068e-05	0.00203729
GO Molecular Function	GO:0001158	enhancer sequence-specific DNA binding	152	30.2071	51	1.68835	0.0130302	0.335526	5	16	29	4.91641e-05	0.00274723
GO Molecular Function	GO:0046982	protein heterodimerization activity	555	110.296	148	1.34185	0.037813	0.266667	35	101	405	5.18564e-05	0.00285442
GO Molecular Function	GO:0000978	RNA polymerase II core promoter proximal region sequence-specific DNA binding	149	29.6109	50	1.68857	0.0127747	0.33557	8	17	37	5.77561e-05	0.00313242
GO Molecular Function	GO:0003713	transcription coactivator activity	562	111.687	149	1.33409	0.0380685	0.265125	42	96	275	6.6574e-05	0.00355833
GO Molecular Function	GO:0005499	vitamin D binding	10	1.98731	8	4.02555	0.00204395	0.8	1	1	6	7.38855e-05	0.00389271
GO Molecular Function	GO:0015267	channel activity	383	76.1138	107	1.40579	0.0273378	0.279373	47	118	400	7.89276e-05	0.004068
GO Molecular Function	GO:0051393	alpha-actinin binding	37	7.35303	18	2.44797	0.00459888	0.486486	4	5	18	7.94186e-05	0.004068
GO Molecular Function	GO:0004872	receptor activity	732	145.471	187	1.28548	0.0477772	0.255464	93	234	1492	8.3282e-05	0.00420745
GO Molecular Function	GO:0022891	substrate-specific transmembrane transporter activity	596	118.444	156	1.31708	0.0398569	0.261745	70	194	824	9.05764e-05	0.00451413
GO Molecular Function	GO:0031406	carboxylic acid binding	129	25.6363	44	1.71632	0.0112417	0.341085	12	40	178	0.000101946	0.00494704
GO Molecular Function	GO:0043177	organic acid binding	129	25.6363	44	1.71632	0.0112417	0.341085	12	40	179	0.000101946	0.00494704
GO Molecular Function	GO:0035014	phosphatidylinositol 3-kinase regulator activity	15	2.98096	10	3.35462	0.00255493	0.666667	1	2	9	0.00010623	0.00508802
GO Molecular Function	GO:0070412	R-SMAD binding	145	28.8159	48	1.66574	0.0122637	0.331035	4	9	19	0.000117162	0.00553019
GO Molecular Function	GO:0019904	protein domain specific binding	844	167.729	211	1.25798	0.053909	0.25	60	167	538	0.000118461	0.00553019
GO Molecular Function	GO:0003714	transcription corepressor activity	711	141.298	181	1.28099	0.0462443	0.254571	33	77	196	0.000131142	0.00604562
GO Molecular Function	GO:0005001	transmembrane receptor protein tyrosine phosphatase activity	18	3.57715	11	3.07507	0.00281042	0.611111	2	6	18	0.000148644	0.00676787
GO Molecular Function	GO:0016594	glycine binding	13	2.5835	9	3.48365	0.00229944	0.692308	4	5	13	0.000156711	0.00704819
GO Molecular Function	GO:0042805	actinin binding	39	7.75049	18	2.32243	0.00459888	0.461538	4	7	22	0.000186197	0.00827341
GO Molecular Function	GO:0008301	DNA binding, bending	84	16.6934	31	1.85702	0.00792029	0.369048	8	12	55	0.000212652	0.00933643
GO Molecular Function	GO:0004879	ligand-activated sequence-specific DNA binding RNA polymerase II transcription factor activity	149	29.6109	48	1.62103	0.0122637	0.322148	11	20	49	0.000243181	0.0105512
GO Molecular Function	GO:0015355	secondary active monocarboxylate transmembrane transporter activity	5	0.993653	5	5.03194	0.00127747	1	1	1	5	0.000309339	0.0132656
GO Molecular Function	GO:0005004	GPI-linked ephrin receptor activity	7	1.39111	6	4.31309	0.00153296	0.857143	3	3	5	0.000356748	0.0151229
GO Molecular Function	GO:0022839	ion gated channel activity	326	64.7862	90	1.38918	0.0229944	0.276074	42	98	300	0.00042906	0.0179815
GO Molecular Function	GO:0043422	protein kinase B binding	17	3.37842	10	2.95996	0.00255493	0.588235	1	4	9	0.000464405	0.0192441
GO Molecular Function	GO:0005516	calmodulin binding	100	19.8731	34	1.71086	0.00868677	0.34	16	36	166	0.000634256	0.0259904
GO Molecular Function	GO:0015187	glycine transmembrane transporter activity	15	2.98096	9	3.01916	0.00229944	0.6	3	3	6	0.000743561	0.0301346
GO Molecular Function	GO:0003708	retinoic acid receptor activity	47	9.34034	19	2.03419	0.00485437	0.404255	5	6	8	0.000969803	0.0388765
GO Molecular Function	GO:0090079	translation regulator activity, nucleic acid binding	31	6.16065	14	2.27249	0.0035769	0.451613	2	4	12	0.00124761	0.0494751
GO Molecular Function	GO:0022892	substrate-specific transporter activity	694	137.919	170	1.23261	0.0434338	0.244957	78	223	955	0.00139147	0.054593
GO Molecular Function	GO:0008134	transcription factor binding	928	184.422	221	1.19834	0.056464	0.238147	58	157	459	0.00142803	0.0554151
GO Molecular Function	GO:0004407	histone deacetylase activity	25	4.96827	12	2.41533	0.00306592	0.48	2	8	20	0.00144248	0.0554151
GO Molecular Function	GO:0004972	N-methyl-D-aspartate selective glutamate receptor activity	6	1.19238	5	4.19328	0.00127747	0.833333	2	2	6	0.00154897	0.0588929
GO Molecular Function	GO:0050664	oxidoreductase activity, acting on NAD(P)H, oxygen as acceptor	63	12.52	23	1.83706	0.00587634	0.365079	3	5	14	0.00157374	0.059224
GO Molecular Function	GO:0008066	glutamate receptor activity	35	6.95557	15	2.15654	0.0038324	0.428571	9	17	26	0.00162239	0.0604381
GO Molecular Function	GO:0022890	inorganic cation transmembrane transporter activity	397	78.8961	103	1.30551	0.0263158	0.259446	43	122	478	0.0017848	0.0658233
GO Molecular Function	GO:0005294	neutral L-amino acid secondary active transmembrane transporter activity	11	2.18604	7	3.20214	0.00178845	0.636364	2	2	3	0.00188374	0.06811
GO Molecular Function	GO:0015375	glycine:sodium symporter activity	11	2.18604	7	3.20214	0.00178845	0.636364	2	2	2	0.00188374	0.06811
GO Molecular Function	GO:0046873	metal ion transmembrane transporter activity	367	72.9342	96	1.31626	0.0245273	0.26158	41	112	386	0.00191029	0.0683995
GO Molecular Function	GO:0008509	anion transmembrane transporter activity	150	29.8096	45	1.50958	0.0114972	0.3	24	48	235	0.0019568	0.0693912
GO Molecular Function	GO:0000900	translation repressor activity, nucleic acid binding	29	5.76319	13	2.2557	0.00332141	0.448276	1	2	5	0.0020121	0.0700059
GO Molecular Function	GO:0042835	BRE binding	29	5.76319	13	2.2557	0.00332141	0.448276	1	2	2	0.0020121	0.0700059
GO Molecular Function	GO:0045182	translation regulator activity	50	9.93653	19	1.91214	0.00485437	0.38	4	10	26	0.00229754	0.0791899
GO Molecular Function	GO:0016175	superoxide-generating NADPH oxidase activity	61	12.1226	22	1.8148	0.00562085	0.360656	2	4	9	0.00235585	0.0797171
GO Molecular Function	GO:0005272	sodium channel activity	23	4.57081	11	2.40658	0.00281042	0.478261	5	7	35	0.00235606	0.0797171
GO Molecular Function	GO:0022857	transmembrane transporter activity	666	132.355	162	1.22398	0.0413899	0.243243	76	212	907	0.00241209	0.0808708
GO Molecular Function	GO:0005416	cation:amino acid symporter activity	17	3.37842	9	2.66397	0.00229944	0.529412	3	5	12	0.00245338	0.0815139
GO Molecular Function	GO:0043425	bHLH transcription factor binding	47	9.34034	18	1.92712	0.00459888	0.382979	5	11	24	0.002683	0.0883472
GO Molecular Function	GO:0015077	monovalent inorganic cation transmembrane transporter activity	284	56.4395	76	1.34658	0.0194175	0.267606	30	82	330	0.00284054	0.0927071
GO Molecular Function	GO:0033558	protein deacetylase activity	27	5.36573	12	2.23642	0.00306592	0.444444	2	9	21	0.0032488	0.104522
GO Molecular Function	GO:0004888	transmembrane signaling receptor activity	422	83.8643	107	1.27587	0.0273378	0.253555	64	160	1181	0.00325922	0.104522
GO Molecular Function	GO:0004871	signal transducer activity	865	171.902	204	1.18672	0.0521206	0.235838	102	269	1586	0.00341087	0.108442
GO Molecular Function	GO:0008190	eukaryotic initiation factor 4E binding	24	4.76954	11	2.3063	0.00281042	0.458333	3	3	6	0.00357595	0.112719
GO Molecular Function	GO:0016651	oxidoreductase activity, acting on NAD(P)H	79	15.6997	26	1.65608	0.00664282	0.329114	5	12	101	0.00432228	0.13509
GO Molecular Function	GO:0030553	cGMP binding	7	1.39111	5	3.59424	0.00127747	0.714286	2	3	15	0.00452954	0.140378
GO Molecular Function	GO:0004970	ionotropic glutamate receptor activity	25	4.96827	11	2.21405	0.00281042	0.44	7	11	18	0.00525225	0.161297
GO Molecular Function	GO:0015081	sodium ion transmembrane transporter activity	84	16.6934	27	1.61741	0.00689831	0.321429	14	30	122	0.005292	0.161297
GO Molecular Function	GO:0016811	hydrolase activity, acting on carbon-nitrogen (but not peptide) bonds, in linear amides	32	6.35938	13	2.04422	0.00332141	0.40625	3	10	58	0.00568517	0.17186
GO Molecular Function	GO:0004842	ubiquitin-protein ligase activity	288	57.2344	75	1.3104	0.019162	0.260417	16	71	261	0.00624426	0.184411
GO Molecular Function	GO:0015293	symporter activity	109	21.6616	33	1.52343	0.00843127	0.302752	16	28	128	0.00624439	0.184411
GO Molecular Function	GO:0008013	beta-catenin binding	142	28.2198	41	1.45288	0.0104752	0.288732	13	24	61	0.00631543	0.184411
GO Molecular Function	GO:0001078	RNA polymerase II core promoter proximal region sequence-specific DNA binding transcription factor activity involved in negative regulation of transcription	89	17.687	28	1.58308	0.00715381	0.314607	8	12	33	0.00635038	0.184411
GO Molecular Function	GO:0001227	RNA polymerase II transcription regulatory region sequence-specific DNA binding transcription factor activity involved in negative regulation of transcription	89	17.687	28	1.58308	0.00715381	0.314607	8	12	35	0.00635038	0.184411
GO Molecular Function	GO:0005230	extracellular ligand-gated ion channel activity	58	11.5264	20	1.73515	0.00510986	0.344828	13	25	72	0.00650126	0.187313
GO Molecular Function	GO:0004692	cGMP-dependent protein kinase activity	5	0.993653	4	4.02555	0.00102197	0.8	1	2	2	0.0065519	0.187313
GO Molecular Function	GO:0005261	cation channel activity	302	60.0166	78	1.29964	0.0199285	0.258278	31	86	273	0.00668952	0.189564
GO Molecular Function	GO:0005283	sodium:amino acid symporter activity	13	2.5835	7	2.7095	0.00178845	0.538461	2	4	10	0.00673342	0.189564
GO Molecular Function	GO:0015108	chloride transmembrane transporter activity	47	9.34034	17	1.82006	0.00434338	0.361702	10	16	76	0.00683792	0.191047
GO Molecular Function	GO:0005234	extracellular-glutamate-gated ion channel activity	26	5.167	11	2.1289	0.00281042	0.423077	7	12	19	0.00749172	0.20774
GO Molecular Function	GO:0015179	L-amino acid transmembrane transporter activity	33	6.55811	13	1.98228	0.00332141	0.393939	5	10	40	0.00770111	0.208115
GO Molecular Function	GO:0004873	asialoglycoprotein receptor activity	3	0.596192	3	5.03194	0.000766479	1	1	1	3	0.00784382	0.208115
GO Molecular Function	GO:0010855	adenylate cyclase inhibitor activity	3	0.596192	3	5.03194	0.000766479	1	1	1	1	0.00784382	0.208115
GO Molecular Function	GO:0030957	Tat protein binding	3	0.596192	3	5.03194	0.000766479	1	1	1	6	0.00784382	0.208115
GO Molecular Function	GO:0036122	BMP binding	3	0.596192	3	5.03194	0.000766479	1	1	1	3	0.00784382	0.208115
GO Molecular Function	GO:0070905	serine binding	3	0.596192	3	5.03194	0.000766479	1	1	1	2	0.00784382	0.208115
GO Molecular Function	GO:0015103	inorganic anion transmembrane transporter activity	59	11.7251	20	1.70574	0.00510986	0.338983	12	22	109	0.00803373	0.211631
GO Molecular Function	GO:0008324	cation transmembrane transporter activity	453	90.025	111	1.23299	0.0283597	0.245033	47	142	590	0.00846067	0.221297
GO Molecular Function	GO:0015171	amino acid transmembrane transporter activity	37	7.35303	14	1.90398	0.0035769	0.378378	6	14	63	0.00870593	0.226109
GO Molecular Function	GO:0001102	RNA polymerase II activating transcription factor binding	91	18.0845	28	1.54829	0.00715381	0.307692	7	17	35	0.00882955	0.227716
GO Molecular Function	GO:0015175	neutral amino acid transmembrane transporter activity	20	3.97461	9	2.26437	0.00229944	0.45	3	5	21	0.00953236	0.244134
GO Molecular Function	GO:0005237	inhibitory extracellular ligand-gated ion channel activity	8	1.58984	5	3.14496	0.00127747	0.625	3	3	5	0.0101034	0.256973
GO Molecular Function	GO:0016840	carbon-nitrogen lyase activity	11	2.18604	6	2.74469	0.00153296	0.545454	2	4	9	0.0112679	0.282694
GO Molecular Function	GO:0030551	cyclic nucleotide binding	11	2.18604	6	2.74469	0.00153296	0.545454	3	7	33	0.0112679	0.282694
GO Molecular Function	GO:0070888	E-box binding	65	12.9175	21	1.6257	0.00536536	0.323077	6	13	29	0.0121679	0.303211
GO Molecular Function	GO:0005215	transporter activity	827	164.35	190	1.15607	0.0485437	0.229746	93	270	1184	0.0135984	0.336583
GO Molecular Function	GO:0046943	carboxylic acid transmembrane transporter activity	66	13.1162	21	1.60107	0.00536536	0.318182	9	20	97	0.0145818	0.358519
GO Molecular Function	GO:0005231	excitatory extracellular ligand-gated ion channel activity	43	8.54542	15	1.75533	0.0038324	0.348837	9	19	48	0.0153635	0.375237
GO Molecular Function	GO:0015276	ligand-gated ion channel activity	99	19.6743	29	1.474	0.0074093	0.292929	19	40	136	0.0158628	0.381656
GO Molecular Function	GO:0051018	protein kinase A binding	25	4.96827	10	2.01277	0.00255493	0.4	1	6	32	0.0165356	0.381656
GO Molecular Function	GO:0033613	activating transcription factor binding	116	23.0527	33	1.4315	0.00843127	0.284483	9	24	52	0.0165412	0.381656
GO Molecular Function	GO:0004018	N6-(1,2-dicarboxyethyl)AMP AMP-lyase (fumarate-forming) activity	6	1.19238	4	3.35462	0.00102197	0.666667	1	1	1	0.0165577	0.381656
GO Molecular Function	GO:0015280	ligand-gated sodium channel activity	6	1.19238	4	3.35462	0.00102197	0.666667	2	2	9	0.0165577	0.381656
GO Molecular Function	GO:0016595	glutamate binding	6	1.19238	4	3.35462	0.00102197	0.666667	2	3	9	0.0165577	0.381656
GO Molecular Function	GO:0016934	extracellular-glycine-gated chloride channel activity	6	1.19238	4	3.35462	0.00102197	0.666667	2	2	4	0.0165577	0.381656
GO Molecular Function	GO:0022824	transmitter-gated ion channel activity	6	1.19238	4	3.35462	0.00102197	0.666667	2	2	4	0.0165577	0.381656
GO Molecular Function	GO:0070626	(S)-2-(5-amino-1-(5-phospho-D-ribosyl)imidazole-4-carboxamido)succinate AMP-lyase (fumarate-forming) activity	6	1.19238	4	3.35462	0.00102197	0.666667	1	1	1	0.0165577	0.381656
GO Molecular Function	GO:0019787	small conjugating protein ligase activity	300	59.6192	75	1.25798	0.019162	0.25	16	73	276	0.016873	0.386507
GO Molecular Function	GO:0005254	chloride channel activity	29	5.76319	11	1.90867	0.00281042	0.37931	8	13	62	0.0187525	0.426838
GO Molecular Function	GO:0030296	protein tyrosine kinase activator activity	9	1.78858	5	2.79552	0.00127747	0.555556	2	4	12	0.0190375	0.426838
GO Molecular Function	GO:0050321	tau-protein kinase activity	9	1.78858	5	2.79552	0.00127747	0.555556	1	4	12	0.0190375	0.426838
GO Molecular Function	GO:0005326	neurotransmitter transporter activity	22	4.37207	9	2.05852	0.00229944	0.409091	3	7	24	0.0192946	0.426838
GO Molecular Function	GO:0005328	neurotransmitter:sodium symporter activity	22	4.37207	9	2.05852	0.00229944	0.409091	3	7	19	0.0192946	0.426838
GO Molecular Function	GO:0070742	C2H2 zinc finger domain binding	88	17.4883	26	1.48671	0.00664282	0.295455	4	8	13	0.0193281	0.426838
GO Molecular Function	GO:0005246	calcium channel regulator activity	37	7.35303	13	1.76798	0.00332141	0.351351	7	14	27	0.0218373	0.479381
GO Molecular Function	GO:0004857	enzyme inhibitor activity	228	45.3106	58	1.28005	0.0148186	0.254386	21	69	323	0.0233019	0.508505
GO Molecular Function	GO:0015294	solute:cation symporter activity	65	12.9175	20	1.54829	0.00510986	0.307692	9	18	81	0.0243368	0.526608
GO Molecular Function	GO:0005253	anion channel activity	30	5.96192	11	1.84504	0.00281042	0.366667	8	14	69	0.024417	0.526608
GO Molecular Function	GO:0031369	translation initiation factor binding	34	6.75684	12	1.77598	0.00306592	0.352941	4	6	16	0.0260914	0.544066
GO Molecular Function	GO:0008093	cytoskeletal adaptor activity	23	4.57081	9	1.96902	0.00229944	0.391304	3	6	17	0.026232	0.544066
GO Molecular Function	GO:0003831	beta-N-acetylglucosaminylglycopeptide beta-1,4-galactosyltransferase activity	4	0.794923	3	3.77395	0.000766479	0.75	1	1	4	0.0267017	0.544066
GO Molecular Function	GO:0003945	N-acetyllactosamine synthase activity	4	0.794923	3	3.77395	0.000766479	0.75	1	1	4	0.0267017	0.544066
GO Molecular Function	GO:0003995	acyl-CoA dehydrogenase activity	4	0.794923	3	3.77395	0.000766479	0.75	1	1	15	0.0267017	0.544066
GO Molecular Function	GO:0004461	lactose synthase activity	4	0.794923	3	3.77395	0.000766479	0.75	1	1	3	0.0267017	0.544066
GO Molecular Function	GO:0004466	long-chain-acyl-CoA dehydrogenase activity	4	0.794923	3	3.77395	0.000766479	0.75	1	1	3	0.0267017	0.544066
GO Molecular Function	GO:0016361	activin receptor activity, type I	4	0.794923	3	3.77395	0.000766479	0.75	2	2	4	0.0267017	0.544066
GO Molecular Function	GO:0016854	racemase and epimerase activity	4	0.794923	3	3.77395	0.000766479	0.75	2	2	13	0.0267017	0.544066
GO Molecular Function	GO:0016857	racemase and epimerase activity, acting on carbohydrates and derivatives	4	0.794923	3	3.77395	0.000766479	0.75	2	2	8	0.0267017	0.544066
GO Molecular Function	GO:0015291	secondary active transmembrane transporter activity	142	28.2198	38	1.34658	0.00970874	0.267606	20	44	189	0.0281658	0.570744
GO Molecular Function	GO:0008514	organic anion transmembrane transporter activity	95	18.8794	27	1.43013	0.00689831	0.28421	13	28	131	0.0284513	0.57338
GO Molecular Function	GO:0004690	cyclic nucleotide-dependent protein kinase activity	10	1.98731	5	2.51597	0.00127747	0.5	2	3	9	0.0319258	0.636445
GO Molecular Function	GO:0046933	proton-transporting ATP synthase activity, rotational mechanism	10	1.98731	5	2.51597	0.00127747	0.5	1	2	11	0.0319258	0.636445
GO Molecular Function	GO:0005248	voltage-gated sodium channel activity	7	1.39111	4	2.87539	0.00102197	0.571429	2	4	16	0.0325954	0.641871
GO Molecular Function	GO:0016842	amidine-lyase activity	7	1.39111	4	2.87539	0.00102197	0.571429	1	2	3	0.0325954	0.641871
GO Molecular Function	GO:0005112	Notch binding	35	6.95557	12	1.72524	0.00306592	0.342857	5	6	12	0.0327201	0.641871
GO Molecular Function	GO:0030371	translation repressor activity	39	7.75049	13	1.67731	0.00332141	0.333333	1	5	11	0.0337225	0.658035
GO Molecular Function	GO:0015296	anion:cation symporter activity	51	10.1353	16	1.57865	0.00408789	0.313725	7	13	48	0.0347	0.673545
GO Molecular Function	GO:0016849	phosphorus-oxygen lyase activity	17	3.37842	7	2.07197	0.00178845	0.411765	4	6	21	0.0364236	0.703299
GO Molecular Function	GO:0016881	acid-amino acid ligase activity	311	61.8052	75	1.21349	0.019162	0.241158	16	77	302	0.0367625	0.703495
GO Molecular Function	GO:0000035	acyl binding	2	0.397461	2	5.03194	0.000510986	1	1	1	1	0.0394858	0.703495
GO Molecular Function	GO:0000170	sphingosine hydroxylase activity	2	0.397461	2	5.03194	0.000510986	1	1	1	1	0.0394858	0.703495
GO Molecular Function	GO:0003941	L-serine ammonia-lyase activity	2	0.397461	2	5.03194	0.000510986	1	1	1	3	0.0394858	0.703495
GO Molecular Function	GO:0004794	L-threonine ammonia-lyase activity	2	0.397461	2	5.03194	0.000510986	1	1	1	2	0.0394858	0.703495
GO Molecular Function	GO:0004940	beta1-adrenergic receptor activity	2	0.397461	2	5.03194	0.000510986	1	1	1	1	0.0394858	0.703495
GO Molecular Function	GO:0005030	neurotrophin receptor activity	2	0.397461	2	5.03194	0.000510986	1	1	1	4	0.0394858	0.703495
GO Molecular Function	GO:0030297	transmembrane receptor protein tyrosine kinase activator activity	2	0.397461	2	5.03194	0.000510986	1	1	1	4	0.0394858	0.703495
GO Molecular Function	GO:0042284	sphingolipid delta-4 desaturase activity	2	0.397461	2	5.03194	0.000510986	1	1	1	1	0.0394858	0.703495
GO Molecular Function	GO:0042731	PH domain binding	2	0.397461	2	5.03194	0.000510986	1	1	1	4	0.0394858	0.703495
GO Molecular Function	GO:0043121	neurotrophin binding	2	0.397461	2	5.03194	0.000510986	1	1	1	8	0.0394858	0.703495
GO Molecular Function	GO:0044548	S100 protein binding	2	0.397461	2	5.03194	0.000510986	1	1	1	8	0.0394858	0.703495
GO Molecular Function	GO:0048403	brain-derived neurotrophic factor binding	2	0.397461	2	5.03194	0.000510986	1	1	1	1	0.0394858	0.703495
GO Molecular Function	GO:0051379	epinephrine binding	2	0.397461	2	5.03194	0.000510986	1	1	1	5	0.0394858	0.703495
GO Molecular Function	GO:0060175	brain-derived neurotrophic factor-activated receptor activity	2	0.397461	2	5.03194	0.000510986	1	1	1	1	0.0394858	0.703495
GO Molecular Function	GO:0097161	DH domain binding	2	0.397461	2	5.03194	0.000510986	1	1	1	1	0.0394858	0.703495
GO Molecular Function	GO:0048027	mRNA 5'-UTR binding	14	2.78223	6	2.15654	0.00153296	0.428571	3	4	5	0.0425799	0.754975
GO Molecular Function	GO:0005245	voltage-gated calcium channel activity	61	12.1226	18	1.48483	0.00459888	0.295082	8	16	35	0.0467227	0.824466
GO Molecular Function	GO:0050660	flavin adenine dinucleotide binding	11	2.18604	5	2.28724	0.00127747	0.454545	3	7	71	0.0491407	0.855695
GO Molecular Function	GO:0019213	deacetylase activity	45	8.94288	14	1.56549	0.0035769	0.311111	4	15	34	0.0495064	0.855695
GO Molecular Function	GO:0045309	protein phosphorylated amino acid binding	41	8.14796	13	1.59549	0.00332141	0.317073	2	9	20	0.0496463	0.855695
GO Molecular Function	GO:0005003	ephrin receptor activity	18	3.57715	7	1.95686	0.00178845	0.388889	4	6	17	0.0496526	0.855695
GO Molecular Function	GO:0009975	cyclase activity	18	3.57715	7	1.95686	0.00178845	0.388889	4	7	22	0.0496526	0.855695
GO Molecular Function	GO:0019199	transmembrane receptor protein kinase activity	70	13.9111	20	1.4377	0.00510986	0.285714	14	28	82	0.051211	0.878447
GO Molecular Function	GO:0005110	frizzled-2 binding	8	1.58984	4	2.51597	0.00102197	0.5	1	1	2	0.0550873	0.897201
GO Molecular Function	GO:0005115	receptor tyrosine kinase-like orphan receptor binding	8	1.58984	4	2.51597	0.00102197	0.5	1	1	1	0.0550873	0.897201
GO Molecular Function	GO:0005313	L-glutamate transmembrane transporter activity	8	1.58984	4	2.51597	0.00102197	0.5	2	3	13	0.0550873	0.897201
GO Molecular Function	GO:0042165	neurotransmitter binding	8	1.58984	4	2.51597	0.00102197	0.5	1	4	17	0.0550873	0.897201
GO Molecular Function	GO:0042328	heparan sulfate N-acetylglucosaminyltransferase activity	8	1.58984	4	2.51597	0.00102197	0.5	1	1	2	0.0550873	0.897201
GO Molecular Function	GO:0045295	gamma-catenin binding	8	1.58984	4	2.51597	0.00102197	0.5	2	3	12	0.0550873	0.897201
GO Molecular Function	GO:0045499	chemorepellent activity	8	1.58984	4	2.51597	0.00102197	0.5	3	4	5	0.0550873	0.897201
GO Molecular Function	GO:0050508	glucuronosyl-N-acetylglucosaminyl-proteoglycan 4-alpha-N-acetylglucosaminyltransferase activity	8	1.58984	4	2.51597	0.00102197	0.5	1	1	3	0.0550873	0.897201
GO Molecular Function	GO:0050509	N-acetylglucosaminyl-proteoglycan 4-beta-glucuronosyltransferase activity	8	1.58984	4	2.51597	0.00102197	0.5	1	1	2	0.0550873	0.897201
GO Molecular Function	GO:0005262	calcium channel activity	92	18.2832	25	1.36737	0.00638733	0.271739	12	32	100	0.0556475	0.897201
GO Molecular Function	GO:0001642	group III metabotropic glutamate receptor activity	5	0.993653	3	3.01916	0.000766479	0.6	1	2	2	0.0569265	0.897201
GO Molecular Function	GO:0004016	adenylate cyclase activity	5	0.993653	3	3.01916	0.000766479	0.6	2	3	11	0.0569265	0.897201
GO Molecular Function	GO:0008378	galactosyltransferase activity	5	0.993653	3	3.01916	0.000766479	0.6	1	2	32	0.0569265	0.897201
GO Molecular Function	GO:0008493	tetracycline transporter activity	5	0.993653	3	3.01916	0.000766479	0.6	1	1	1	0.0569265	0.897201
GO Molecular Function	GO:0016229	steroid dehydrogenase activity	5	0.993653	3	3.01916	0.000766479	0.6	2	2	29	0.0569265	0.897201
GO Molecular Function	GO:0030284	estrogen receptor activity	5	0.993653	3	3.01916	0.000766479	0.6	1	1	5	0.0569265	0.897201
GO Molecular Function	GO:0033764	steroid dehydrogenase activity, acting on the CH-OH group of donors, NAD or NADP as acceptor	5	0.993653	3	3.01916	0.000766479	0.6	2	2	26	0.0569265	0.897201
GO Molecular Function	GO:0035250	UDP-galactosyltransferase activity	5	0.993653	3	3.01916	0.000766479	0.6	1	2	21	0.0569265	0.897201
GO Molecular Function	GO:0042895	antibiotic transporter activity	5	0.993653	3	3.01916	0.000766479	0.6	1	1	3	0.0569265	0.897201
GO Molecular Function	GO:0016597	amino acid binding	47	9.34034	14	1.49887	0.0035769	0.297872	7	20	95	0.068774	1
GO Molecular Function	GO:0004890	GABA-A receptor activity	12	2.38477	5	2.09664	0.00127747	0.416667	4	5	18	0.0708205	1
GO Molecular Function	GO:0016917	GABA receptor activity	12	2.38477	5	2.09664	0.00127747	0.416667	4	5	21	0.0708205	1
GO Molecular Function	GO:0036442	hydrogen-exporting ATPase activity	12	2.38477	5	2.09664	0.00127747	0.416667	1	4	21	0.0708205	1
GO Molecular Function	GO:0044769	ATPase activity, coupled to transmembrane movement of ions, rotational mechanism	12	2.38477	5	2.09664	0.00127747	0.416667	1	4	19	0.0708205	1
GO Molecular Function	GO:0046961	proton-transporting ATPase activity, rotational mechanism	12	2.38477	5	2.09664	0.00127747	0.416667	1	4	17	0.0708205	1
GO Molecular Function	GO:0005267	potassium channel activity	175	34.7779	43	1.23642	0.0109862	0.245714	15	44	117	0.0734722	1
GO Molecular Function	GO:0022804	active transmembrane transporter activity	203	40.3423	49	1.2146	0.0125192	0.241379	25	63	303	0.076972	1
GO Molecular Function	GO:0015079	potassium ion transmembrane transporter activity	176	34.9766	43	1.22939	0.0109862	0.244318	15	45	133	0.0791816	1
GO Molecular Function	GO:0000980	RNA polymerase II distal enhancer sequence-specific DNA binding	44	8.74415	13	1.48671	0.00332141	0.295455	2	10	17	0.0821033	1
GO Molecular Function	GO:0016810	hydrolase activity, acting on carbon-nitrogen (but not peptide) bonds	44	8.74415	13	1.48671	0.00332141	0.295455	3	18	116	0.0821033	1
GO Molecular Function	GO:0015301	anion:anion antiporter activity	9	1.78858	4	2.23642	0.00102197	0.444444	3	5	23	0.0839272	1
GO Molecular Function	GO:0008028	monocarboxylic acid transmembrane transporter activity	32	6.35938	10	1.57248	0.00255493	0.3125	5	8	29	0.0866011	1
GO Molecular Function	GO:0019900	kinase binding	374	74.3253	85	1.14362	0.0217169	0.227273	30	111	421	0.0930337	1
GO Molecular Function	GO:0031625	ubiquitin protein ligase binding	234	46.503	55	1.18272	0.0140521	0.235043	14	44	159	0.0955351	1
GO Molecular Function	GO:0004984	olfactory receptor activity	6	1.19238	3	2.51597	0.000766479	0.5	1	2	382	0.0972953	1
GO Molecular Function	GO:0010851	cyclase regulator activity	6	1.19238	3	2.51597	0.000766479	0.5	1	3	8	0.0972953	1
GO Molecular Function	GO:0030306	ADP-ribosylation factor binding	6	1.19238	3	2.51597	0.000766479	0.5	2	4	6	0.0972953	1
GO Molecular Function	GO:0005342	organic acid transmembrane transporter activity	80	15.8985	21	1.32088	0.00536536	0.2625	9	22	100	0.100835	1
GO Molecular Function	GO:0004145	diamine N-acetyltransferase activity	3	0.596192	2	3.35462	0.000510986	0.666667	1	1	2	0.10277	1
GO Molecular Function	GO:0004750	ribulose-phosphate 3-epimerase activity	3	0.596192	2	3.35462	0.000510986	0.666667	1	1	1	0.10277	1
GO Molecular Function	GO:0004886	9-cis retinoic acid receptor activity	3	0.596192	2	3.35462	0.000510986	0.666667	1	1	3	0.10277	1
GO Molecular Function	GO:0008511	sodium:potassium:chloride symporter activity	3	0.596192	2	3.35462	0.000510986	0.666667	1	1	2	0.10277	1
GO Molecular Function	GO:0010577	metalloenzyme activator activity	3	0.596192	2	3.35462	0.000510986	0.666667	1	1	1	0.10277	1
GO Molecular Function	GO:0019809	spermidine binding	3	0.596192	2	3.35462	0.000510986	0.666667	1	1	1	0.10277	1
GO Molecular Function	GO:0019826	oxygen sensor activity	3	0.596192	2	3.35462	0.000510986	0.666667	1	1	3	0.10277	1
GO Molecular Function	GO:0036139	peptidyl-histidine dioxygenase activity	3	0.596192	2	3.35462	0.000510986	0.666667	1	1	1	0.10277	1
GO Molecular Function	GO:0036140	peptidyl-asparagine 3-dioxygenase activity	3	0.596192	2	3.35462	0.000510986	0.666667	1	1	1	0.10277	1
GO Molecular Function	GO:0036310	annealing helicase activity	3	0.596192	2	3.35462	0.000510986	0.666667	1	1	5	0.10277	1
GO Molecular Function	GO:0060422	peptidyl-dipeptidase inhibitor activity	3	0.596192	2	3.35462	0.000510986	0.666667	1	1	1	0.10277	1
GO Molecular Function	GO:0070644	vitamin D response element binding	3	0.596192	2	3.35462	0.000510986	0.666667	1	1	3	0.10277	1
GO Molecular Function	GO:0071532	ankyrin repeat binding	3	0.596192	2	3.35462	0.000510986	0.666667	1	1	3	0.10277	1
GO Molecular Function	GO:0086006	voltage-gated sodium channel activity involved in regulation of cardiac muscle cell action potential	3	0.596192	2	3.35462	0.000510986	0.666667	1	1	5	0.10277	1
GO Molecular Function	GO:0086063	voltage-gated sodium channel activity involved in regulation of SA node cell action potential	3	0.596192	2	3.35462	0.000510986	0.666667	1	1	1	0.10277	1
GO Molecular Function	GO:0015377	cation:chloride symporter activity	17	3.37842	6	1.77598	0.00153296	0.352941	2	2	8	0.103036	1
GO Molecular Function	GO:0038024	cargo receptor activity	21	4.17334	7	1.67731	0.00178845	0.333333	4	11	63	0.105511	1
GO Molecular Function	GO:0071889	14-3-3 protein binding	21	4.17334	7	1.67731	0.00178845	0.333333	3	6	16	0.105511	1
GO Molecular Function	GO:0015370	solute:sodium symporter activity	46	9.14161	13	1.42207	0.00332141	0.282609	6	15	49	0.109819	1
GO Molecular Function	GO:0019901	protein kinase binding	354	70.3507	80	1.13716	0.0204395	0.225989	26	101	379	0.110524	1
GO Molecular Function	GO:0015085	calcium ion transmembrane transporter activity	99	19.6743	25	1.27069	0.00638733	0.252525	12	35	116	0.113399	1
GO Molecular Function	GO:0016309	1-phosphatidylinositol-5-phosphate 4-kinase activity	10	1.98731	4	2.01277	0.00102197	0.4	1	2	3	0.118595	1
GO Molecular Function	GO:0008083	growth factor activity	136	27.0274	33	1.22098	0.00843127	0.242647	16	37	163	0.120357	1
GO Molecular Function	GO:0048018	receptor agonist activity	34	6.75684	10	1.47998	0.00255493	0.294118	4	9	15	0.121258	1
GO Molecular Function	GO:0016879	ligase activity, forming carbon-nitrogen bonds	352	69.9532	79	1.12933	0.020184	0.224432	17	83	336	0.125445	1
GO Molecular Function	GO:0051721	protein phosphatase 2A binding	14	2.78223	5	1.79712	0.00127747	0.357143	2	7	17	0.12705	1
GO Molecular Function	GO:0005024	transforming growth factor beta-activated receptor activity	22	4.37207	7	1.60107	0.00178845	0.318182	5	8	17	0.12944	1
GO Molecular Function	GO:0032947	protein complex scaffold	22	4.37207	7	1.60107	0.00178845	0.318182	4	12	53	0.12944	1
GO Molecular Function	GO:0017002	activin-activated receptor activity	18	3.57715	6	1.67731	0.00153296	0.333333	4	4	7	0.129727	1
GO Molecular Function	GO:0003730	mRNA 3'-UTR binding	56	11.1289	15	1.34784	0.0038324	0.267857	6	14	27	0.130474	1
GO Molecular Function	GO:0050692	DBD domain binding	39	7.75049	11	1.41926	0.00281042	0.282051	1	1	1	0.135807	1
GO Molecular Function	GO:0004714	transmembrane receptor protein tyrosine kinase activity	48	9.53907	13	1.36282	0.00332141	0.270833	9	20	65	0.142403	1
GO Molecular Function	GO:0015106	bicarbonate transmembrane transporter activity	7	1.39111	3	2.15654	0.000766479	0.428571	2	4	9	0.14582	1
GO Molecular Function	GO:0016015	morphogen activity	7	1.39111	3	2.15654	0.000766479	0.428571	1	3	6	0.14582	1
GO Molecular Function	GO:0005343	organic acid:sodium symporter activity	31	6.16065	9	1.46088	0.00229944	0.290323	4	10	28	0.146272	1
GO Molecular Function	GO:0017147	Wnt-protein binding	23	4.57081	7	1.53146	0.00178845	0.304348	6	11	28	0.155808	1
GO Molecular Function	GO:0004383	guanylate cyclase activity	11	2.18604	4	1.82979	0.00102197	0.363636	2	2	8	0.158283	1
GO Molecular Function	GO:0004897	ciliary neurotrophic factor receptor activity	11	2.18604	4	1.82979	0.00102197	0.363636	1	1	4	0.158283	1
GO Molecular Function	GO:0015020	glucuronosyltransferase activity	15	2.98096	5	1.67731	0.00127747	0.333333	2	5	32	0.160896	1
GO Molecular Function	GO:0005178	integrin binding	36	7.1543	10	1.39776	0.00255493	0.277778	8	20	86	0.162426	1
GO Molecular Function	GO:0005244	voltage-gated ion channel activity	216	42.9258	49	1.1415	0.0125192	0.226852	25	63	182	0.169157	1
GO Molecular Function	GO:0072509	divalent inorganic cation transmembrane transporter activity	104	20.668	25	1.2096	0.00638733	0.240385	12	39	143	0.171704	1
GO Molecular Function	GO:0019842	vitamin binding	28	5.56446	8	1.4377	0.00204395	0.285714	1	11	76	0.176991	1
GO Molecular Function	GO:0019955	cytokine binding	77	15.3023	19	1.24165	0.00485437	0.246753	8	15	65	0.178686	1
GO Molecular Function	GO:0003854	3-beta-hydroxy-delta5-steroid dehydrogenase activity	4	0.794923	2	2.51597	0.000510986	0.5	1	1	7	0.178838	1
GO Molecular Function	GO:0003951	NAD+ kinase activity	4	0.794923	2	2.51597	0.000510986	0.5	1	3	16	0.178838	1
GO Molecular Function	GO:0004143	diacylglycerol kinase activity	4	0.794923	2	2.51597	0.000510986	0.5	1	3	14	0.178838	1
GO Molecular Function	GO:0004950	chemokine receptor activity	4	0.794923	2	2.51597	0.000510986	0.5	2	2	26	0.178838	1
GO Molecular Function	GO:0005025	transforming growth factor beta receptor activity, type I	4	0.794923	2	2.51597	0.000510986	0.5	2	3	4	0.178838	1
GO Molecular Function	GO:0005280	hydrogen:amino acid symporter activity	4	0.794923	2	2.51597	0.000510986	0.5	1	1	2	0.178838	1
GO Molecular Function	GO:0005452	inorganic anion exchanger activity	4	0.794923	2	2.51597	0.000510986	0.5	2	2	13	0.178838	1
GO Molecular Function	GO:0015295	solute:hydrogen symporter activity	4	0.794923	2	2.51597	0.000510986	0.5	1	1	13	0.178838	1
GO Molecular Function	GO:0015450	P-P-bond-hydrolysis-driven protein transmembrane transporter activity	4	0.794923	2	2.51597	0.000510986	0.5	1	1	7	0.178838	1
GO Molecular Function	GO:0015495	gamma-aminobutyric acid:hydrogen symporter activity	4	0.794923	2	2.51597	0.000510986	0.5	1	1	1	0.178838	1
GO Molecular Function	GO:0016841	ammonia-lyase activity	4	0.794923	2	2.51597	0.000510986	0.5	1	2	5	0.178838	1
GO Molecular Function	GO:0030977	taurine binding	4	0.794923	2	2.51597	0.000510986	0.5	1	2	2	0.178838	1
GO Molecular Function	GO:0035240	dopamine binding	4	0.794923	2	2.51597	0.000510986	0.5	1	3	9	0.178838	1
GO Molecular Function	GO:0035925	mRNA 3'-UTR AU-rich region binding	4	0.794923	2	2.51597	0.000510986	0.5	1	1	3	0.178838	1
GO Molecular Function	GO:0038036	sphingosine-1-phosphate receptor activity	4	0.794923	2	2.51597	0.000510986	0.5	1	2	6	0.178838	1
GO Molecular Function	GO:0045125	bioactive lipid receptor activity	4	0.794923	2	2.51597	0.000510986	0.5	1	2	9	0.178838	1
GO Molecular Function	GO:0047016	cholest-5-ene-3-beta,7-alpha-diol 3-beta-dehydrogenase activity	4	0.794923	2	2.51597	0.000510986	0.5	1	1	1	0.178838	1
GO Molecular Function	GO:0050308	sugar-phosphatase activity	4	0.794923	2	2.51597	0.000510986	0.5	2	2	10	0.178838	1
GO Molecular Function	GO:0055100	adiponectin binding	4	0.794923	2	2.51597	0.000510986	0.5	1	1	1	0.178838	1
GO Molecular Function	GO:0008158	hedgehog receptor activity	46	9.14161	12	1.31268	0.00306592	0.26087	3	4	10	0.188846	1
GO Molecular Function	GO:0004896	cytokine receptor activity	20	3.97461	6	1.50958	0.00153296	0.3	3	6	83	0.191557	1
GO Molecular Function	GO:0034711	inhibin binding	20	3.97461	6	1.50958	0.00153296	0.3	3	4	5	0.191557	1
GO Molecular Function	GO:0050840	extracellular matrix binding	20	3.97461	6	1.50958	0.00153296	0.3	4	11	41	0.191557	1
GO Molecular Function	GO:0016307	phosphatidylinositol phosphate kinase activity	16	3.17969	5	1.57248	0.00127747	0.3125	2	5	15	0.197882	1
GO Molecular Function	GO:0000253	3-keto sterol reductase activity	1	0.198731	1	5.03194	0.000255493	1	1	1	3	0.198731	1
GO Molecular Function	GO:0001054	RNA polymerase I activity	1	0.198731	1	5.03194	0.000255493	1	1	1	8	0.198731	1
GO Molecular Function	GO:0001056	RNA polymerase III activity	1	0.198731	1	5.03194	0.000255493	1	1	1	8	0.198731	1
GO Molecular Function	GO:0001733	galactosylceramide sulfotransferase activity	1	0.198731	1	5.03194	0.000255493	1	1	1	4	0.198731	1
GO Molecular Function	GO:0003873	6-phosphofructo-2-kinase activity	1	0.198731	1	5.03194	0.000255493	1	1	1	4	0.198731	1
GO Molecular Function	GO:0003882	CDP-diacylglycerol-serine O-phosphatidyltransferase activity	1	0.198731	1	5.03194	0.000255493	1	1	1	1	0.198731	1
GO Molecular Function	GO:0003908	methylated-DNA-[protein]-cysteine S-methyltransferase activity	1	0.198731	1	5.03194	0.000255493	1	1	1	1	0.198731	1
GO Molecular Function	GO:0003960	NADPH:quinone reductase activity	1	0.198731	1	5.03194	0.000255493	1	1	1	4	0.198731	1
GO Molecular Function	GO:0004105	choline-phosphate cytidylyltransferase activity	1	0.198731	1	5.03194	0.000255493	1	1	1	2	0.198731	1
GO Molecular Function	GO:0004303	estradiol 17-beta-dehydrogenase activity	1	0.198731	1	5.03194	0.000255493	1	1	1	9	0.198731	1
GO Molecular Function	GO:0004325	ferrochelatase activity	1	0.198731	1	5.03194	0.000255493	1	1	1	1	0.198731	1
GO Molecular Function	GO:0004331	fructose-2,6-bisphosphate 2-phosphatase activity	1	0.198731	1	5.03194	0.000255493	1	1	1	6	0.198731	1
GO Molecular Function	GO:0004821	histidine-tRNA ligase activity	1	0.198731	1	5.03194	0.000255493	1	1	1	2	0.198731	1
GO Molecular Function	GO:0004822	isoleucine-tRNA ligase activity	1	0.198731	1	5.03194	0.000255493	1	1	1	2	0.198731	1
GO Molecular Function	GO:0004830	tryptophan-tRNA ligase activity	1	0.198731	1	5.03194	0.000255493	1	1	1	2	0.198731	1
GO Molecular Function	GO:0004856	xylulokinase activity	1	0.198731	1	5.03194	0.000255493	1	1	1	1	0.198731	1
GO Molecular Function	GO:0004962	endothelin receptor activity	1	0.198731	1	5.03194	0.000255493	1	1	1	2	0.198731	1
GO Molecular Function	GO:0005020	stem cell factor receptor activity	1	0.198731	1	5.03194	0.000255493	1	1	1	1	0.198731	1
GO Molecular Function	GO:0005148	prolactin receptor binding	1	0.198731	1	5.03194	0.000255493	1	1	1	4	0.198731	1
GO Molecular Function	GO:0005338	nucleotide-sugar transmembrane transporter activity	1	0.198731	1	5.03194	0.000255493	1	1	1	8	0.198731	1
GO Molecular Function	GO:0005461	UDP-glucuronic acid transmembrane transporter activity	1	0.198731	1	5.03194	0.000255493	1	1	1	1	0.198731	1
GO Molecular Function	GO:0005463	UDP-N-acetylgalactosamine transmembrane transporter activity	1	0.198731	1	5.03194	0.000255493	1	1	1	1	0.198731	1
GO Molecular Function	GO:0008127	quercetin 2,3-dioxygenase activity	1	0.198731	1	5.03194	0.000255493	1	1	1	1	0.198731	1
GO Molecular Function	GO:0008172	S-methyltransferase activity	1	0.198731	1	5.03194	0.000255493	1	1	1	6	0.198731	1
GO Molecular Function	GO:0008294	calcium- and calmodulin-responsive adenylate cyclase activity	1	0.198731	1	5.03194	0.000255493	1	1	1	3	0.198731	1
GO Molecular Function	GO:0008321	Ral guanyl-nucleotide exchange factor activity	1	0.198731	1	5.03194	0.000255493	1	1	1	3	0.198731	1
GO Molecular Function	GO:0008387	steroid 7-alpha-hydroxylase activity	1	0.198731	1	5.03194	0.000255493	1	1	1	1	0.198731	1
GO Molecular Function	GO:0008395	steroid hydroxylase activity	1	0.198731	1	5.03194	0.000255493	1	1	1	16	0.198731	1
GO Molecular Function	GO:0008396	oxysterol 7-alpha-hydroxylase activity	1	0.198731	1	5.03194	0.000255493	1	1	1	2	0.198731	1
GO Molecular Function	GO:0008427	calcium-dependent protein kinase inhibitor activity	1	0.198731	1	5.03194	0.000255493	1	1	1	2	0.198731	1
GO Molecular Function	GO:0008428	ribonuclease inhibitor activity	1	0.198731	1	5.03194	0.000255493	1	1	1	2	0.198731	1
GO Molecular Function	GO:0008442	3-hydroxyisobutyrate dehydrogenase activity	1	0.198731	1	5.03194	0.000255493	1	1	1	1	0.198731	1
GO Molecular Function	GO:0008513	secondary active organic cation transmembrane transporter activity	1	0.198731	1	5.03194	0.000255493	1	1	1	3	0.198731	1
GO Molecular Function	GO:0008545	JUN kinase kinase activity	1	0.198731	1	5.03194	0.000255493	1	1	1	2	0.198731	1
GO Molecular Function	GO:0008812	choline dehydrogenase activity	1	0.198731	1	5.03194	0.000255493	1	1	1	1	0.198731	1
GO Molecular Function	GO:0015165	pyrimidine nucleotide-sugar transmembrane transporter activity	1	0.198731	1	5.03194	0.000255493	1	1	1	6	0.198731	1
GO Molecular Function	GO:0015215	nucleotide transmembrane transporter activity	1	0.198731	1	5.03194	0.000255493	1	1	1	13	0.198731	1
GO Molecular Function	GO:0015226	carnitine transmembrane transporter activity	1	0.198731	1	5.03194	0.000255493	1	1	1	3	0.198731	1
GO Molecular Function	GO:0015247	aminophospholipid transporter activity	1	0.198731	1	5.03194	0.000255493	1	1	1	2	0.198731	1
GO Molecular Function	GO:0015272	ATP-activated inward rectifier potassium channel activity	1	0.198731	1	5.03194	0.000255493	1	1	1	3	0.198731	1
GO Molecular Function	GO:0016165	linoleate 13S-lipoxygenase activity	1	0.198731	1	5.03194	0.000255493	1	1	1	2	0.198731	1
GO Molecular Function	GO:0016709	oxidoreductase activity, acting on paired donors, with incorporation or reduction of molecular oxygen, NAD(P)H as one donor, and incorporation of one atom of oxygen	1	0.198731	1	5.03194	0.000255493	1	1	1	39	0.198731	1
GO Molecular Function	GO:0016780	phosphotransferase activity, for other substituted phosphate groups	1	0.198731	1	5.03194	0.000255493	1	1	1	15	0.198731	1
GO Molecular Function	GO:0017169	CDP-alcohol phosphatidyltransferase activity	1	0.198731	1	5.03194	0.000255493	1	1	1	8	0.198731	1
GO Molecular Function	GO:0019956	chemokine binding	1	0.198731	1	5.03194	0.000255493	1	1	1	13	0.198731	1
GO Molecular Function	GO:0019957	C-C chemokine binding	1	0.198731	1	5.03194	0.000255493	1	1	1	6	0.198731	1
GO Molecular Function	GO:0030350	iron-responsive element binding	1	0.198731	1	5.03194	0.000255493	1	1	1	3	0.198731	1
GO Molecular Function	GO:0030628	pre-mRNA 3'-splice site binding	1	0.198731	1	5.03194	0.000255493	1	1	1	2	0.198731	1
GO Molecular Function	GO:0031491	nucleosome binding	1	0.198731	1	5.03194	0.000255493	1	1	1	15	0.198731	1
GO Molecular Function	GO:0031492	nucleosomal DNA binding	1	0.198731	1	5.03194	0.000255493	1	1	1	7	0.198731	1
GO Molecular Function	GO:0033735	aspartate dehydrogenase activity	1	0.198731	1	5.03194	0.000255493	1	1	1	1	0.198731	1
GO Molecular Function	GO:0033782	24-hydroxycholesterol 7alpha-hydroxylase activity	1	0.198731	1	5.03194	0.000255493	1	1	1	1	0.198731	1
GO Molecular Function	GO:0034056	estrogen response element binding	1	0.198731	1	5.03194	0.000255493	1	1	1	4	0.198731	1
GO Molecular Function	GO:0034987	immunoglobulin receptor binding	1	0.198731	1	5.03194	0.000255493	1	1	1	3	0.198731	1
GO Molecular Function	GO:0034988	Fc-gamma receptor I complex binding	1	0.198731	1	5.03194	0.000255493	1	1	1	2	0.198731	1
GO Molecular Function	GO:0035612	AP-2 adaptor complex binding	1	0.198731	1	5.03194	0.000255493	1	1	1	5	0.198731	1
GO Molecular Function	GO:0035615	clathrin adaptor activity	1	0.198731	1	5.03194	0.000255493	1	1	1	3	0.198731	1
GO Molecular Function	GO:0035642	histone methyltransferase activity (H3-R17 specific)	1	0.198731	1	5.03194	0.000255493	1	1	1	1	0.198731	1
GO Molecular Function	GO:0043522	leucine zipper domain binding	1	0.198731	1	5.03194	0.000255493	1	1	1	8	0.198731	1
GO Molecular Function	GO:0046592	polyamine oxidase activity	1	0.198731	1	5.03194	0.000255493	1	1	1	2	0.198731	1
GO Molecular Function	GO:0046922	peptide-O-fucosyltransferase activity	1	0.198731	1	5.03194	0.000255493	1	1	1	2	0.198731	1
GO Molecular Function	GO:0050062	long-chain-fatty-acyl-CoA reductase activity	1	0.198731	1	5.03194	0.000255493	1	1	1	2	0.198731	1
GO Molecular Function	GO:0050121	N-acylglucosamine 2-epimerase activity	1	0.198731	1	5.03194	0.000255493	1	1	1	1	0.198731	1
GO Molecular Function	GO:0050473	arachidonate 15-lipoxygenase activity	1	0.198731	1	5.03194	0.000255493	1	1	1	3	0.198731	1
GO Molecular Function	GO:0050698	proteoglycan sulfotransferase activity	1	0.198731	1	5.03194	0.000255493	1	1	1	3	0.198731	1
GO Molecular Function	GO:0051425	PTB domain binding	1	0.198731	1	5.03194	0.000255493	1	1	1	4	0.198731	1
GO Molecular Function	GO:0052894	norspermine:oxygen oxidoreductase activity	1	0.198731	1	5.03194	0.000255493	1	1	1	1	0.198731	1
GO Molecular Function	GO:0052895	N1-acetylspermine:oxygen oxidoreductase (N1-acetylspermidine-forming) activity	1	0.198731	1	5.03194	0.000255493	1	1	1	1	0.198731	1
GO Molecular Function	GO:0052901	spermine:oxygen oxidoreductase (spermidine-forming) activity	1	0.198731	1	5.03194	0.000255493	1	1	1	2	0.198731	1
GO Molecular Function	GO:0070095	fructose-6-phosphate binding	1	0.198731	1	5.03194	0.000255493	1	1	1	3	0.198731	1
GO Molecular Function	GO:0072349	modified amino acid transmembrane transporter activity	1	0.198731	1	5.03194	0.000255493	1	1	1	10	0.198731	1
GO Molecular Function	GO:0080019	fatty-acyl-CoA reductase (alcohol-forming) activity	1	0.198731	1	5.03194	0.000255493	1	1	1	2	0.198731	1
GO Molecular Function	GO:0022843	voltage-gated cation channel activity	205	40.7398	46	1.12912	0.0117527	0.22439	22	56	138	0.199665	1
GO Molecular Function	GO:0005172	vascular endothelial growth factor receptor binding	8	1.58984	3	1.88698	0.000766479	0.375	1	3	8	0.20026	1
GO Molecular Function	GO:0016861	intramolecular oxidoreductase activity, interconverting aldoses and ketoses	8	1.58984	3	1.88698	0.000766479	0.375	2	4	10	0.20026	1
GO Molecular Function	GO:0043184	vascular endothelial growth factor receptor 2 binding	8	1.58984	3	1.88698	0.000766479	0.375	1	3	5	0.20026	1
GO Molecular Function	GO:0051861	glycolipid binding	8	1.58984	3	1.88698	0.000766479	0.375	1	3	21	0.20026	1
GO Molecular Function	GO:0004435	phosphatidylinositol phospholipase C activity	12	2.38477	4	1.67731	0.00102197	0.333333	3	6	29	0.202014	1
GO Molecular Function	GO:0005310	dicarboxylic acid transmembrane transporter activity	12	2.38477	4	1.67731	0.00102197	0.333333	2	6	24	0.202014	1
GO Molecular Function	GO:0050682	AF-2 domain binding	12	2.38477	4	1.67731	0.00102197	0.333333	1	1	3	0.202014	1
GO Molecular Function	GO:0050998	nitric-oxide synthase binding	12	2.38477	4	1.67731	0.00102197	0.333333	3	6	9	0.202014	1
GO Molecular Function	GO:0019207	kinase regulator activity	121	24.0464	28	1.16441	0.00715381	0.231405	9	37	133	0.212473	1
GO Molecular Function	GO:0002039	p53 binding	61	12.1226	15	1.23736	0.0038324	0.245902	6	19	51	0.218427	1
GO Molecular Function	GO:0051219	phosphoprotein binding	57	11.3277	14	1.23591	0.0035769	0.245614	3	17	46	0.230254	1
GO Molecular Function	GO:0030331	estrogen receptor binding	85	16.8921	20	1.18399	0.00510986	0.235294	7	14	26	0.234598	1
GO Molecular Function	GO:0042813	Wnt-activated receptor activity	17	3.37842	5	1.47998	0.00127747	0.294118	4	8	20	0.237402	1
GO Molecular Function	GO:0005125	cytokine activity	81	16.0972	19	1.18033	0.00485437	0.234568	6	30	213	0.246482	1
GO Molecular Function	GO:0001640	adenylate cyclase inhibiting G-protein coupled glutamate receptor activity	13	2.5835	4	1.54829	0.00102197	0.307692	2	5	6	0.248739	1
GO Molecular Function	GO:0004629	phospholipase C activity	13	2.5835	4	1.54829	0.00102197	0.307692	3	7	31	0.248739	1
GO Molecular Function	GO:0019200	carbohydrate kinase activity	13	2.5835	4	1.54829	0.00102197	0.307692	5	7	19	0.248739	1
GO Molecular Function	GO:0050661	NADP binding	13	2.5835	4	1.54829	0.00102197	0.307692	4	6	47	0.248739	1
GO Molecular Function	GO:0004702	receptor signaling protein serine/threonine kinase activity	49	9.7378	12	1.23231	0.00306592	0.244898	9	18	49	0.2569	1
GO Molecular Function	GO:0004971	alpha-amino-3-hydroxy-5-methyl-4-isoxazole propionate selective glutamate receptor activity	9	1.78858	3	1.67731	0.000766479	0.333333	2	4	4	0.258426	1
GO Molecular Function	GO:0010576	metalloenzyme regulator activity	9	1.78858	3	1.67731	0.000766479	0.333333	2	5	15	0.258426	1
GO Molecular Function	GO:0016627	oxidoreductase activity, acting on the CH-CH group of donors	9	1.78858	3	1.67731	0.000766479	0.333333	1	4	55	0.258426	1
GO Molecular Function	GO:0004616	phosphogluconate dehydrogenase (decarboxylating) activity	5	0.993653	2	2.01277	0.000510986	0.4	2	2	3	0.260112	1
GO Molecular Function	GO:0004807	triose-phosphate isomerase activity	5	0.993653	2	2.01277	0.000510986	0.4	1	1	1	0.260112	1
GO Molecular Function	GO:0004939	beta-adrenergic receptor activity	5	0.993653	2	2.01277	0.000510986	0.4	1	2	3	0.260112	1
GO Molecular Function	GO:0008320	protein transmembrane transporter activity	5	0.993653	2	2.01277	0.000510986	0.4	1	2	15	0.260112	1
GO Molecular Function	GO:0016647	oxidoreductase activity, acting on the CH-NH group of donors, oxygen as acceptor	5	0.993653	2	2.01277	0.000510986	0.4	2	2	3	0.260112	1
GO Molecular Function	GO:0019825	oxygen binding	5	0.993653	2	2.01277	0.000510986	0.4	1	3	37	0.260112	1
GO Molecular Function	GO:0022884	macromolecule transmembrane transporter activity	5	0.993653	2	2.01277	0.000510986	0.4	1	2	17	0.260112	1
GO Molecular Function	GO:0030552	cAMP binding	5	0.993653	2	2.01277	0.000510986	0.4	2	4	21	0.260112	1
GO Molecular Function	GO:0031849	olfactory receptor binding	5	0.993653	2	2.01277	0.000510986	0.4	1	1	3	0.260112	1
GO Molecular Function	GO:0035173	histone kinase activity	5	0.993653	2	2.01277	0.000510986	0.4	1	2	12	0.260112	1
GO Molecular Function	GO:0035184	histone threonine kinase activity	5	0.993653	2	2.01277	0.000510986	0.4	1	2	5	0.260112	1
GO Molecular Function	GO:0035402	histone kinase activity (H3-T11 specific)	5	0.993653	2	2.01277	0.000510986	0.4	1	2	2	0.260112	1
GO Molecular Function	GO:0051380	norepinephrine binding	5	0.993653	2	2.01277	0.000510986	0.4	1	2	4	0.260112	1
GO Molecular Function	GO:0052742	phosphatidylinositol kinase activity	5	0.993653	2	2.01277	0.000510986	0.4	2	4	15	0.260112	1
GO Molecular Function	GO:0061133	endopeptidase activator activity	5	0.993653	2	2.01277	0.000510986	0.4	1	3	5	0.260112	1
GO Molecular Function	GO:1901505	carbohydrate derivative transporter activity	5	0.993653	2	2.01277	0.000510986	0.4	2	2	27	0.260112	1
GO Molecular Function	GO:0042056	chemoattractant activity	22	4.37207	6	1.37235	0.00153296	0.272727	2	5	20	0.262175	1
GO Molecular Function	GO:0001653	peptide receptor activity	31	6.16065	8	1.29856	0.00204395	0.258064	6	16	122	0.26382	1
GO Molecular Function	GO:0030546	receptor activator activity	54	10.7315	13	1.21139	0.00332141	0.240741	6	14	29	0.265882	1
GO Molecular Function	GO:0030545	receptor regulator activity	59	11.7251	14	1.19402	0.0035769	0.237288	7	16	39	0.273832	1
GO Molecular Function	GO:0048306	calcium-dependent protein binding	27	5.36573	7	1.30458	0.00178845	0.259259	6	12	41	0.28071	1
GO Molecular Function	GO:0071813	lipoprotein particle binding	32	6.35938	8	1.25798	0.00204395	0.25	3	8	23	0.29522	1
GO Molecular Function	GO:0008227	G-protein coupled amine receptor activity	14	2.78223	4	1.4377	0.00102197	0.285714	3	10	46	0.297415	1
GO Molecular Function	GO:0015379	potassium:chloride symporter activity	14	2.78223	4	1.4377	0.00102197	0.285714	1	1	4	0.297415	1
GO Molecular Function	GO:0017075	syntaxin-1 binding	14	2.78223	4	1.4377	0.00102197	0.285714	2	7	14	0.297415	1
GO Molecular Function	GO:0043395	heparan sulfate proteoglycan binding	14	2.78223	4	1.4377	0.00102197	0.285714	2	4	15	0.297415	1
GO Molecular Function	GO:0046974	histone methyltransferase activity (H3-K9 specific)	14	2.78223	4	1.4377	0.00102197	0.285714	2	2	6	0.297415	1
GO Molecular Function	GO:0019829	cation-transporting ATPase activity	23	4.57081	6	1.31268	0.00153296	0.26087	2	11	65	0.299717	1
GO Molecular Function	GO:0042625	ATPase activity, coupled to transmembrane movement of ions	23	4.57081	6	1.31268	0.00153296	0.26087	2	11	67	0.299717	1
GO Molecular Function	GO:0050693	LBD domain binding	51	10.1353	12	1.18399	0.00306592	0.235294	2	3	4	0.306385	1
GO Molecular Function	GO:0015078	hydrogen ion transmembrane transporter activity	37	7.35303	9	1.22398	0.00229944	0.243243	4	14	100	0.306959	1
GO Molecular Function	GO:0090484	drug transporter activity	10	1.98731	3	1.50958	0.000766479	0.3	1	4	18	0.318354	1
GO Molecular Function	GO:0030165	PDZ domain binding	95	18.8794	21	1.11232	0.00536536	0.221053	14	30	81	0.33049	1
GO Molecular Function	GO:0005515	protein binding	6839	1359.12	1371	1.00874	0.350281	0.200468	647	1998	7997	0.334397	1
GO Molecular Function	GO:0016504	peptidase activator activity	24	4.76954	6	1.25798	0.00153296	0.25	4	14	35	0.338157	1
GO Molecular Function	GO:0004935	adrenergic receptor activity	6	1.19238	2	1.67731	0.000510986	0.333333	1	3	15	0.34152	1
GO Molecular Function	GO:0005174	CD40 receptor binding	6	1.19238	2	1.67731	0.000510986	0.333333	1	1	2	0.34152	1
GO Molecular Function	GO:0008046	axon guidance receptor activity	6	1.19238	2	1.67731	0.000510986	0.333333	2	3	8	0.34152	1
GO Molecular Function	GO:0008188	neuropeptide receptor activity	6	1.19238	2	1.67731	0.000510986	0.333333	2	5	42	0.34152	1
GO Molecular Function	GO:0015185	gamma-aminobutyric acid transmembrane transporter activity	6	1.19238	2	1.67731	0.000510986	0.333333	1	3	5	0.34152	1
GO Molecular Function	GO:0016362	activin receptor activity, type II	6	1.19238	2	1.67731	0.000510986	0.333333	1	1	2	0.34152	1
GO Molecular Function	GO:0051371	muscle alpha-actinin binding	6	1.19238	2	1.67731	0.000510986	0.333333	2	2	8	0.34152	1
GO Molecular Function	GO:0019838	growth factor binding	86	17.0908	19	1.11171	0.00485437	0.22093	14	29	106	0.342967	1
GO Molecular Function	GO:0004709	MAP kinase kinase kinase activity	15	2.98096	4	1.34185	0.00102197	0.266667	3	6	19	0.347058	1
GO Molecular Function	GO:0004812	aminoacyl-tRNA ligase activity	15	2.98096	4	1.34185	0.00102197	0.266667	4	10	45	0.347058	1
GO Molecular Function	GO:0017136	NAD-dependent histone deacetylase activity	15	2.98096	4	1.34185	0.00102197	0.266667	1	6	16	0.347058	1
GO Molecular Function	GO:0032041	NAD-dependent histone deacetylase activity (H3-K14 specific)	15	2.98096	4	1.34185	0.00102197	0.266667	1	6	12	0.347058	1
GO Molecular Function	GO:0046969	NAD-dependent histone deacetylase activity (H3-K9 specific)	15	2.98096	4	1.34185	0.00102197	0.266667	1	6	13	0.347058	1
GO Molecular Function	GO:0046970	NAD-dependent histone deacetylase activity (H4-K16 specific)	15	2.98096	4	1.34185	0.00102197	0.266667	1	6	11	0.347058	1
GO Molecular Function	GO:0097372	NAD-dependent histone deacetylase activity (H3-K18 specific)	15	2.98096	4	1.34185	0.00102197	0.266667	1	6	12	0.347058	1
GO Molecular Function	GO:0000403	Y-form DNA binding	2	0.397461	1	2.51597	0.000255493	0.5	1	1	5	0.357976	1
GO Molecular Function	GO:0000405	bubble DNA binding	2	0.397461	1	2.51597	0.000255493	0.5	1	1	6	0.357976	1
GO Molecular Function	GO:0001055	RNA polymerase II activity	2	0.397461	1	2.51597	0.000255493	0.5	1	2	9	0.357976	1
GO Molecular Function	GO:0001727	lipid kinase activity	2	0.397461	1	2.51597	0.000255493	0.5	1	2	6	0.357976	1
GO Molecular Function	GO:0004118	cGMP-stimulated cyclic-nucleotide phosphodiesterase activity	2	0.397461	1	2.51597	0.000255493	0.5	1	1	3	0.357976	1
GO Molecular Function	GO:0004450	isocitrate dehydrogenase (NADP+) activity	2	0.397461	1	2.51597	0.000255493	0.5	1	1	2	0.357976	1
GO Molecular Function	GO:0004476	mannose-6-phosphate isomerase activity	2	0.397461	1	2.51597	0.000255493	0.5	1	2	3	0.357976	1
GO Molecular Function	GO:0004630	phospholipase D activity	2	0.397461	1	2.51597	0.000255493	0.5	1	2	6	0.357976	1
GO Molecular Function	GO:0004698	calcium-dependent protein kinase C activity	2	0.397461	1	2.51597	0.000255493	0.5	1	1	3	0.357976	1
GO Molecular Function	GO:0004819	glutamine-tRNA ligase activity	2	0.397461	1	2.51597	0.000255493	0.5	1	1	1	0.357976	1
GO Molecular Function	GO:0004996	thyroid-stimulating hormone receptor activity	2	0.397461	1	2.51597	0.000255493	0.5	1	1	2	0.357976	1
GO Molecular Function	GO:0005314	high-affinity glutamate transmembrane transporter activity	2	0.397461	1	2.51597	0.000255493	0.5	1	1	1	0.357976	1
GO Molecular Function	GO:0008198	ferrous iron binding	2	0.397461	1	2.51597	0.000255493	0.5	1	2	13	0.357976	1
GO Molecular Function	GO:0008252	nucleotidase activity	2	0.397461	1	2.51597	0.000255493	0.5	1	1	12	0.357976	1
GO Molecular Function	GO:0008253	5'-nucleotidase activity	2	0.397461	1	2.51597	0.000255493	0.5	1	1	10	0.357976	1
GO Molecular Function	GO:0008417	fucosyltransferase activity	2	0.397461	1	2.51597	0.000255493	0.5	1	2	14	0.357976	1
GO Molecular Function	GO:0008419	RNA lariat debranching enzyme activity	2	0.397461	1	2.51597	0.000255493	0.5	1	1	1	0.357976	1
GO Molecular Function	GO:0008443	phosphofructokinase activity	2	0.397461	1	2.51597	0.000255493	0.5	1	2	7	0.357976	1
GO Molecular Function	GO:0008494	translation activator activity	2	0.397461	1	2.51597	0.000255493	0.5	1	2	7	0.357976	1
GO Molecular Function	GO:0008510	sodium:bicarbonate symporter activity	2	0.397461	1	2.51597	0.000255493	0.5	1	1	3	0.357976	1
GO Molecular Function	GO:0008574	plus-end-directed microtubule motor activity	2	0.397461	1	2.51597	0.000255493	0.5	1	2	5	0.357976	1
GO Molecular Function	GO:0009008	DNA-methyltransferase activity	2	0.397461	1	2.51597	0.000255493	0.5	1	2	5	0.357976	1
GO Molecular Function	GO:0009378	four-way junction helicase activity	2	0.397461	1	2.51597	0.000255493	0.5	1	1	2	0.357976	1
GO Molecular Function	GO:0015605	organophosphate ester transmembrane transporter activity	2	0.397461	1	2.51597	0.000255493	0.5	1	2	15	0.357976	1
GO Molecular Function	GO:0015651	quaternary ammonium group transmembrane transporter activity	2	0.397461	1	2.51597	0.000255493	0.5	1	2	9	0.357976	1
GO Molecular Function	GO:0016174	NAD(P)H oxidase activity	2	0.397461	1	2.51597	0.000255493	0.5	1	1	6	0.357976	1
GO Molecular Function	GO:0016303	1-phosphatidylinositol-3-kinase activity	2	0.397461	1	2.51597	0.000255493	0.5	1	2	11	0.357976	1
GO Molecular Function	GO:0017081	chloride channel regulator activity	2	0.397461	1	2.51597	0.000255493	0.5	1	2	7	0.357976	1
GO Molecular Function	GO:0031005	filamin binding	2	0.397461	1	2.51597	0.000255493	0.5	1	1	6	0.357976	1
GO Molecular Function	GO:0035005	1-phosphatidylinositol-4-phosphate 3-kinase activity	2	0.397461	1	2.51597	0.000255493	0.5	1	2	7	0.357976	1
GO Molecular Function	GO:0035242	protein-arginine omega-N asymmetric methyltransferase activity	2	0.397461	1	2.51597	0.000255493	0.5	1	2	5	0.357976	1
GO Molecular Function	GO:0036002	pre-mRNA binding	2	0.397461	1	2.51597	0.000255493	0.5	1	2	10	0.357976	1
GO Molecular Function	GO:0036105	peroxisome membrane class-1 targeting sequence binding	2	0.397461	1	2.51597	0.000255493	0.5	1	1	1	0.357976	1
GO Molecular Function	GO:0042500	aspartic endopeptidase activity, intramembrane cleaving	2	0.397461	1	2.51597	0.000255493	0.5	1	1	3	0.357976	1
GO Molecular Function	GO:0043138	3'-5' DNA helicase activity	2	0.397461	1	2.51597	0.000255493	0.5	1	1	6	0.357976	1
GO Molecular Function	GO:0043140	ATP-dependent 3'-5' DNA helicase activity	2	0.397461	1	2.51597	0.000255493	0.5	1	1	5	0.357976	1
GO Molecular Function	GO:0043495	protein anchor	2	0.397461	1	2.51597	0.000255493	0.5	1	1	7	0.357976	1
GO Molecular Function	GO:0050501	hyaluronan synthase activity	2	0.397461	1	2.51597	0.000255493	0.5	1	2	4	0.357976	1
GO Molecular Function	GO:0051378	serotonin binding	2	0.397461	1	2.51597	0.000255493	0.5	1	2	8	0.357976	1
GO Molecular Function	GO:0051537	2 iron, 2 sulfur cluster binding	2	0.397461	1	2.51597	0.000255493	0.5	1	2	19	0.357976	1
GO Molecular Function	GO:0051880	G-quadruplex DNA binding	2	0.397461	1	2.51597	0.000255493	0.5	1	1	3	0.357976	1
GO Molecular Function	GO:0070290	NAPE-specific phospholipase D activity	2	0.397461	1	2.51597	0.000255493	0.5	1	2	5	0.357976	1
GO Molecular Function	GO:0097016	L27 domain binding	2	0.397461	1	2.51597	0.000255493	0.5	1	2	2	0.357976	1
GO Molecular Function	GO:0050662	coenzyme binding	53	10.5327	12	1.13931	0.00306592	0.226415	10	28	182	0.358048	1
GO Molecular Function	GO:0003729	mRNA binding	204	40.541	43	1.06065	0.0109862	0.210784	16	43	107	0.359186	1
GO Molecular Function	GO:0008035	high-density lipoprotein particle binding	20	3.97461	5	1.25798	0.00127747	0.25	1	3	7	0.364792	1
GO Molecular Function	GO:0001968	fibronectin binding	11	2.18604	3	1.37235	0.000766479	0.272727	2	4	17	0.378381	1
GO Molecular Function	GO:0005041	low-density lipoprotein receptor activity	11	2.18604	3	1.37235	0.000766479	0.272727	2	5	10	0.378381	1
GO Molecular Function	GO:0016941	natriuretic peptide receptor activity	11	2.18604	3	1.37235	0.000766479	0.272727	1	2	3	0.378381	1
GO Molecular Function	GO:0030228	lipoprotein particle receptor activity	11	2.18604	3	1.37235	0.000766479	0.272727	2	5	13	0.378381	1
GO Molecular Function	GO:0015297	antiporter activity	30	5.96192	7	1.17412	0.00178845	0.233333	6	16	62	0.38617	1
GO Molecular Function	GO:0016614	oxidoreductase activity, acting on CH-OH group of donors	30	5.96192	7	1.17412	0.00178845	0.233333	6	18	131	0.38617	1
GO Molecular Function	GO:0019905	syntaxin binding	30	5.96192	7	1.17412	0.00178845	0.233333	4	14	40	0.38617	1
GO Molecular Function	GO:0043394	proteoglycan binding	16	3.17969	4	1.25798	0.00102197	0.25	2	5	20	0.396784	1
GO Molecular Function	GO:0016829	lyase activity	89	17.687	19	1.07423	0.00485437	0.213483	10	36	160	0.404556	1
GO Molecular Function	GO:0008528	G-protein coupled peptide receptor activity	21	4.17334	5	1.19808	0.00127747	0.238095	5	15	120	0.408172	1
GO Molecular Function	GO:0004725	protein tyrosine phosphatase activity	60	11.9238	13	1.09025	0.00332141	0.216667	3	28	104	0.41378	1
GO Molecular Function	GO:0000268	peroxisome targeting sequence binding	7	1.39111	2	1.4377	0.000510986	0.285714	2	2	5	0.4198	1
GO Molecular Function	GO:0005451	monovalent cation:hydrogen antiporter activity	7	1.39111	2	1.4377	0.000510986	0.285714	2	4	10	0.4198	1
GO Molecular Function	GO:0008599	protein phosphatase type 1 regulator activity	7	1.39111	2	1.4377	0.000510986	0.285714	1	2	6	0.4198	1
GO Molecular Function	GO:0015299	solute:hydrogen antiporter activity	7	1.39111	2	1.4377	0.000510986	0.285714	2	4	17	0.4198	1
GO Molecular Function	GO:0015385	sodium:hydrogen antiporter activity	7	1.39111	2	1.4377	0.000510986	0.285714	2	4	9	0.4198	1
GO Molecular Function	GO:1901338	catecholamine binding	7	1.39111	2	1.4377	0.000510986	0.285714	1	4	14	0.4198	1
GO Molecular Function	GO:0035257	nuclear hormone receptor binding	164	32.5918	34	1.04321	0.00868677	0.207317	15	36	129	0.421843	1
GO Molecular Function	GO:0005496	steroid binding	90	17.8858	19	1.0623	0.00485437	0.211111	4	16	79	0.42535	1
GO Molecular Function	GO:0004697	protein kinase C activity	12	2.38477	3	1.25798	0.000766479	0.25	3	5	16	0.43717	1
GO Molecular Function	GO:0005005	transmembrane-ephrin receptor activity	12	2.38477	3	1.25798	0.000766479	0.25	2	3	9	0.43717	1
GO Molecular Function	GO:0019534	toxin transporter activity	12	2.38477	3	1.25798	0.000766479	0.25	1	3	8	0.43717	1
GO Molecular Function	GO:0046965	retinoid X receptor binding	12	2.38477	3	1.25798	0.000766479	0.25	3	5	14	0.43717	1
GO Molecular Function	GO:0005165	neurotrophin receptor binding	17	3.37842	4	1.18399	0.00102197	0.235294	1	1	9	0.445824	1
GO Molecular Function	GO:0005167	neurotrophin TRK receptor binding	17	3.37842	4	1.18399	0.00102197	0.235294	1	1	6	0.445824	1
GO Molecular Function	GO:0005169	neurotrophin TRKB receptor binding	17	3.37842	4	1.18399	0.00102197	0.235294	1	1	1	0.445824	1
GO Molecular Function	GO:0008375	acetylglucosaminyltransferase activity	17	3.37842	4	1.18399	0.00102197	0.235294	1	6	42	0.445824	1
GO Molecular Function	GO:0048487	beta-tubulin binding	17	3.37842	4	1.18399	0.00102197	0.235294	3	9	29	0.445824	1
GO Molecular Function	GO:0016922	ligand-dependent nuclear receptor binding	96	19.0781	20	1.04832	0.00510986	0.208333	4	12	21	0.446945	1
GO Molecular Function	GO:0033130	acetylcholine receptor binding	22	4.37207	5	1.14362	0.00127747	0.227273	3	4	6	0.451113	1
GO Molecular Function	GO:0070016	armadillo repeat domain binding	22	4.37207	5	1.14362	0.00127747	0.227273	2	6	10	0.451113	1
GO Molecular Function	GO:0008194	UDP-glycosyltransferase activity	47	9.34034	10	1.07062	0.00255493	0.212766	5	21	133	0.462063	1
GO Molecular Function	GO:0000217	DNA secondary structure binding	3	0.596192	1	1.67731	0.000255493	0.333333	1	2	13	0.485578	1
GO Molecular Function	GO:0002161	aminoacyl-tRNA editing activity	3	0.596192	1	1.67731	0.000255493	0.333333	1	2	7	0.485578	1
GO Molecular Function	GO:0004069	L-aspartate:2-oxoglutarate aminotransferase activity	3	0.596192	1	1.67731	0.000255493	0.333333	1	2	3	0.485578	1
GO Molecular Function	GO:0004346	glucose-6-phosphatase activity	3	0.596192	1	1.67731	0.000255493	0.333333	1	1	3	0.485578	1
GO Molecular Function	GO:0004365	glyceraldehyde-3-phosphate dehydrogenase (NAD+) (phosphorylating) activity	3	0.596192	1	1.67731	0.000255493	0.333333	1	1	2	0.485578	1
GO Molecular Function	GO:0004430	1-phosphatidylinositol 4-kinase activity	3	0.596192	1	1.67731	0.000255493	0.333333	1	2	4	0.485578	1
GO Molecular Function	GO:0004534	5'-3' exoribonuclease activity	3	0.596192	1	1.67731	0.000255493	0.333333	1	1	1	0.485578	1
GO Molecular Function	GO:0004555	alpha,alpha-trehalase activity	3	0.596192	1	1.67731	0.000255493	0.333333	1	1	1	0.485578	1
GO Molecular Function	GO:0004716	receptor signaling protein tyrosine kinase activity	3	0.596192	1	1.67731	0.000255493	0.333333	1	3	9	0.485578	1
GO Molecular Function	GO:0004859	phospholipase inhibitor activity	3	0.596192	1	1.67731	0.000255493	0.333333	1	2	11	0.485578	1
GO Molecular Function	GO:0004946	bombesin receptor activity	3	0.596192	1	1.67731	0.000255493	0.333333	1	2	3	0.485578	1
GO Molecular Function	GO:0004949	cannabinoid receptor activity	3	0.596192	1	1.67731	0.000255493	0.333333	1	2	3	0.485578	1
GO Molecular Function	GO:0004993	serotonin receptor activity	3	0.596192	1	1.67731	0.000255493	0.333333	1	4	14	0.485578	1
GO Molecular Function	GO:0008240	tripeptidyl-peptidase activity	3	0.596192	1	1.67731	0.000255493	0.333333	1	1	2	0.485578	1
GO Molecular Function	GO:0008503	benzodiazepine receptor activity	3	0.596192	1	1.67731	0.000255493	0.333333	1	2	6	0.485578	1
GO Molecular Function	GO:0010857	calcium-dependent protein kinase activity	3	0.596192	1	1.67731	0.000255493	0.333333	1	2	4	0.485578	1
GO Molecular Function	GO:0015439	heme-transporting ATPase activity	3	0.596192	1	1.67731	0.000255493	0.333333	1	1	1	0.485578	1
GO Molecular Function	GO:0016494	C-X-C chemokine receptor activity	3	0.596192	1	1.67731	0.000255493	0.333333	1	1	8	0.485578	1
GO Molecular Function	GO:0016500	protein-hormone receptor activity	3	0.596192	1	1.67731	0.000255493	0.333333	1	2	9	0.485578	1
GO Molecular Function	GO:0019862	IgA binding	3	0.596192	1	1.67731	0.000255493	0.333333	1	1	2	0.485578	1
GO Molecular Function	GO:0019865	immunoglobulin binding	3	0.596192	1	1.67731	0.000255493	0.333333	1	1	16	0.485578	1
GO Molecular Function	GO:0031726	CCR1 chemokine receptor binding	3	0.596192	1	1.67731	0.000255493	0.333333	1	2	6	0.485578	1
GO Molecular Function	GO:0035004	phosphatidylinositol 3-kinase activity	3	0.596192	1	1.67731	0.000255493	0.333333	1	3	12	0.485578	1
GO Molecular Function	GO:0035605	peptidyl-cysteine S-nitrosylase activity	3	0.596192	1	1.67731	0.000255493	0.333333	1	1	1	0.485578	1
GO Molecular Function	GO:0046904	calcium oxalate binding	3	0.596192	1	1.67731	0.000255493	0.333333	1	1	1	0.485578	1
GO Molecular Function	GO:0047184	1-acylglycerophosphocholine O-acyltransferase activity	3	0.596192	1	1.67731	0.000255493	0.333333	1	1	5	0.485578	1
GO Molecular Function	GO:0047192	1-alkylglycerophosphocholine O-acetyltransferase activity	3	0.596192	1	1.67731	0.000255493	0.333333	1	1	3	0.485578	1
GO Molecular Function	GO:0050431	transforming growth factor beta binding	3	0.596192	1	1.67731	0.000255493	0.333333	1	2	12	0.485578	1
GO Molecular Function	GO:0050542	icosanoid binding	3	0.596192	1	1.67731	0.000255493	0.333333	1	2	7	0.485578	1
GO Molecular Function	GO:0050543	icosatetraenoic acid binding	3	0.596192	1	1.67731	0.000255493	0.333333	1	2	7	0.485578	1
GO Molecular Function	GO:0050544	arachidonic acid binding	3	0.596192	1	1.67731	0.000255493	0.333333	1	2	6	0.485578	1
GO Molecular Function	GO:0051400	BH domain binding	3	0.596192	1	1.67731	0.000255493	0.333333	1	1	8	0.485578	1
GO Molecular Function	GO:0051434	BH3 domain binding	3	0.596192	1	1.67731	0.000255493	0.333333	1	1	4	0.485578	1
GO Molecular Function	GO:0051920	peroxiredoxin activity	3	0.596192	1	1.67731	0.000255493	0.333333	1	1	7	0.485578	1
GO Molecular Function	GO:0070402	NADPH binding	3	0.596192	1	1.67731	0.000255493	0.333333	1	2	10	0.485578	1
GO Molecular Function	GO:0070513	death domain binding	3	0.596192	1	1.67731	0.000255493	0.333333	1	1	8	0.485578	1
GO Molecular Function	GO:0070546	L-phenylalanine aminotransferase activity	3	0.596192	1	1.67731	0.000255493	0.333333	1	2	5	0.485578	1
GO Molecular Function	GO:0070567	cytidylyltransferase activity	3	0.596192	1	1.67731	0.000255493	0.333333	1	3	7	0.485578	1
GO Molecular Function	GO:0072541	peroxynitrite reductase activity	3	0.596192	1	1.67731	0.000255493	0.333333	1	1	1	0.485578	1
GO Molecular Function	GO:0080130	L-phenylalanine:2-oxoglutarate aminotransferase activity	3	0.596192	1	1.67731	0.000255493	0.333333	1	2	4	0.485578	1
GO Molecular Function	GO:0090409	malonyl-CoA synthetase activity	3	0.596192	1	1.67731	0.000255493	0.333333	1	1	1	0.485578	1
GO Molecular Function	GO:0043178	alcohol binding	78	15.501	16	1.03219	0.00408789	0.205128	4	15	68	0.48871	1
GO Molecular Function	GO:0030674	protein binding, bridging	73	14.5073	15	1.03396	0.0038324	0.205479	9	31	130	0.48906	1
GO Molecular Function	GO:0008144	drug binding	43	8.54542	9	1.0532	0.00229944	0.209302	7	23	81	0.491401	1
GO Molecular Function	GO:0070063	RNA polymerase binding	33	6.55811	7	1.06738	0.00178845	0.212121	3	8	18	0.492282	1
GO Molecular Function	GO:0016616	oxidoreductase activity, acting on the CH-OH group of donors, NAD or NADP as acceptor	28	5.56446	6	1.07827	0.00153296	0.214286	5	16	117	0.492731	1
GO Molecular Function	GO:0017091	AU-rich element binding	28	5.56446	6	1.07827	0.00153296	0.214286	5	5	16	0.492731	1
GO Molecular Function	GO:0004190	aspartic-type endopeptidase activity	8	1.58984	2	1.25798	0.000510986	0.25	2	4	26	0.49298	1
GO Molecular Function	GO:0005247	voltage-gated chloride channel activity	8	1.58984	2	1.25798	0.000510986	0.25	2	4	15	0.49298	1
GO Molecular Function	GO:0008271	secondary active sulfate transmembrane transporter activity	8	1.58984	2	1.25798	0.000510986	0.25	1	4	10	0.49298	1
GO Molecular Function	GO:0015116	sulfate transmembrane transporter activity	8	1.58984	2	1.25798	0.000510986	0.25	1	4	14	0.49298	1
GO Molecular Function	GO:0015277	kainate selective glutamate receptor activity	8	1.58984	2	1.25798	0.000510986	0.25	2	3	5	0.49298	1
GO Molecular Function	GO:0016645	oxidoreductase activity, acting on the CH-NH group of donors	8	1.58984	2	1.25798	0.000510986	0.25	2	5	28	0.49298	1
GO Molecular Function	GO:0017080	sodium channel regulator activity	8	1.58984	2	1.25798	0.000510986	0.25	2	5	24	0.49298	1
GO Molecular Function	GO:0030169	low-density lipoprotein particle binding	8	1.58984	2	1.25798	0.000510986	0.25	1	4	15	0.49298	1
GO Molecular Function	GO:0031435	mitogen-activated protein kinase kinase kinase binding	8	1.58984	2	1.25798	0.000510986	0.25	2	7	18	0.49298	1
GO Molecular Function	GO:0034485	phosphatidylinositol-3,4,5-trisphosphate 5-phosphatase activity	8	1.58984	2	1.25798	0.000510986	0.25	1	1	2	0.49298	1
GO Molecular Function	GO:0052658	inositol-1,4,5-trisphosphate 5-phosphatase activity	8	1.58984	2	1.25798	0.000510986	0.25	1	1	4	0.49298	1
GO Molecular Function	GO:0052659	inositol-1,3,4,5-tetrakisphosphate 5-phosphatase activity	8	1.58984	2	1.25798	0.000510986	0.25	1	1	3	0.49298	1
GO Molecular Function	GO:0070001	aspartic-type peptidase activity	8	1.58984	2	1.25798	0.000510986	0.25	2	4	27	0.49298	1
GO Molecular Function	GO:0020037	heme binding	23	4.57081	5	1.0939	0.00127747	0.217391	5	12	129	0.493167	1
GO Molecular Function	GO:0046906	tetrapyrrole binding	23	4.57081	5	1.0939	0.00127747	0.217391	5	12	138	0.493167	1
GO Molecular Function	GO:0030276	clathrin binding	18	3.57715	4	1.11821	0.00102197	0.222222	4	7	23	0.493541	1
GO Molecular Function	GO:0097110	scaffold protein binding	18	3.57715	4	1.11821	0.00102197	0.222222	3	5	26	0.493541	1
GO Molecular Function	GO:0005544	calcium-dependent phospholipid binding	13	2.5835	3	1.16122	0.000766479	0.230769	3	6	29	0.493699	1
GO Molecular Function	GO:0015298	solute:cation antiporter activity	13	2.5835	3	1.16122	0.000766479	0.230769	3	7	25	0.493699	1
GO Molecular Function	GO:0015491	cation:cation antiporter activity	13	2.5835	3	1.16122	0.000766479	0.230769	3	7	19	0.493699	1
GO Molecular Function	GO:0003743	translation initiation factor activity	84	16.6934	17	1.01837	0.00434338	0.202381	6	21	57	0.510153	1
GO Molecular Function	GO:0031490	chromatin DNA binding	79	15.6997	16	1.01913	0.00408789	0.202532	5	14	34	0.511172	1
GO Molecular Function	GO:0035258	steroid hormone receptor binding	105	20.8667	21	1.00639	0.00536536	0.2	8	23	65	0.526098	1
GO Molecular Function	GO:0004864	protein phosphatase inhibitor activity	34	6.75684	7	1.03599	0.00178845	0.205882	4	12	33	0.526529	1
GO Molecular Function	GO:0005048	signal sequence binding	34	6.75684	7	1.03599	0.00178845	0.205882	5	9	21	0.526529	1
GO Molecular Function	GO:0019212	phosphatase inhibitor activity	34	6.75684	7	1.03599	0.00178845	0.205882	4	12	35	0.526529	1
GO Molecular Function	GO:0003779	actin binding	161	31.9956	32	1.00014	0.00817578	0.198758	21	69	363	0.531369	1
GO Molecular Function	GO:0060090	binding, bridging	75	14.9048	15	1.00639	0.0038324	0.2	9	33	142	0.535202	1
GO Molecular Function	GO:0016874	ligase activity	475	94.3971	94	0.995794	0.0240163	0.197895	27	115	497	0.537191	1
GO Molecular Function	GO:0030246	carbohydrate binding	60	11.9238	12	1.00639	0.00306592	0.2	8	33	224	0.54176	1
GO Molecular Function	GO:0031683	G-protein beta/gamma-subunit complex binding	14	2.78223	3	1.07827	0.000766479	0.214286	2	7	22	0.547231	1
GO Molecular Function	GO:0046875	ephrin receptor binding	50	9.93653	10	1.00639	0.00255493	0.2	6	12	29	0.54749	1
GO Molecular Function	GO:0000149	SNARE binding	40	7.94923	8	1.00639	0.00204395	0.2	5	17	51	0.555029	1
GO Molecular Function	GO:0005506	iron ion binding	40	7.94923	8	1.00639	0.00204395	0.2	6	21	161	0.555029	1
GO Molecular Function	GO:1901681	sulfur compound binding	127	25.2388	25	0.990539	0.00638733	0.19685	15	41	173	0.556851	1
GO Molecular Function	GO:0004340	glucokinase activity	9	1.78858	2	1.11821	0.000510986	0.222222	3	3	5	0.559995	1
GO Molecular Function	GO:0004596	peptide alpha-N-acetyltransferase activity	9	1.78858	2	1.11821	0.000510986	0.222222	2	2	5	0.559995	1
GO Molecular Function	GO:0005521	lamin binding	9	1.78858	2	1.11821	0.000510986	0.222222	1	3	10	0.559995	1
GO Molecular Function	GO:0008308	voltage-gated anion channel activity	9	1.78858	2	1.11821	0.000510986	0.222222	2	5	20	0.559995	1
GO Molecular Function	GO:0008865	fructokinase activity	9	1.78858	2	1.11821	0.000510986	0.222222	3	3	4	0.559995	1
GO Molecular Function	GO:0016701	oxidoreductase activity, acting on single donors with incorporation of molecular oxygen	9	1.78858	2	1.11821	0.000510986	0.222222	2	8	26	0.559995	1
GO Molecular Function	GO:0016702	oxidoreductase activity, acting on single donors with incorporation of molecular oxygen, incorporation of two atoms of oxygen	9	1.78858	2	1.11821	0.000510986	0.222222	2	8	25	0.559995	1
GO Molecular Function	GO:0019158	mannokinase activity	9	1.78858	2	1.11821	0.000510986	0.222222	3	3	4	0.559995	1
GO Molecular Function	GO:0034212	peptide N-acetyltransferase activity	9	1.78858	2	1.11821	0.000510986	0.222222	2	2	6	0.559995	1
GO Molecular Function	GO:0034594	phosphatidylinositol trisphosphate phosphatase activity	9	1.78858	2	1.11821	0.000510986	0.222222	1	2	7	0.559995	1
GO Molecular Function	GO:0043274	phospholipase binding	9	1.78858	2	1.11821	0.000510986	0.222222	1	3	14	0.559995	1
GO Molecular Function	GO:0052743	inositol tetrakisphosphate phosphatase activity	9	1.78858	2	1.11821	0.000510986	0.222222	1	2	5	0.559995	1
GO Molecular Function	GO:1901682	sulfur compound transmembrane transporter activity	9	1.78858	2	1.11821	0.000510986	0.222222	1	5	25	0.559995	1
GO Molecular Function	GO:0000287	magnesium ion binding	71	14.1099	14	0.992213	0.0035769	0.197183	12	34	187	0.560528	1
GO Molecular Function	GO:0005539	glycosaminoglycan binding	107	21.2642	21	0.987576	0.00536536	0.196262	13	35	176	0.564318	1
GO Molecular Function	GO:0005080	protein kinase C binding	30	5.96192	6	1.00639	0.00153296	0.2	3	13	45	0.565737	1
GO Molecular Function	GO:0018024	histone-lysine N-methyltransferase activity	51	10.1353	10	0.986654	0.00255493	0.196078	6	15	41	0.574843	1
GO Molecular Function	GO:0008289	lipid binding	566	112.481	111	0.986829	0.0283597	0.196113	54	155	755	0.580067	1
GO Molecular Function	GO:0008195	phosphatidate phosphatase activity	20	3.97461	4	1.00639	0.00102197	0.2	2	4	11	0.583081	1
GO Molecular Function	GO:0048185	activin binding	41	8.14796	8	0.981841	0.00204395	0.195122	5	6	12	0.585353	1
GO Molecular Function	GO:0001016	RNA polymerase III regulatory region DNA binding	4	0.794923	1	1.25798	0.000255493	0.25	1	2	4	0.587825	1
GO Molecular Function	GO:0004739	pyruvate dehydrogenase (acetyl-transferring) activity	4	0.794923	1	1.25798	0.000255493	0.25	1	1	3	0.587825	1
GO Molecular Function	GO:0004969	histamine receptor activity	4	0.794923	1	1.25798	0.000255493	0.25	1	2	7	0.587825	1
GO Molecular Function	GO:0008115	sarcosine oxidase activity	4	0.794923	1	1.25798	0.000255493	0.25	1	1	1	0.587825	1
GO Molecular Function	GO:0008469	histone-arginine N-methyltransferase activity	4	0.794923	1	1.25798	0.000255493	0.25	1	2	7	0.587825	1
GO Molecular Function	GO:0015932	nucleobase-containing compound transmembrane transporter activity	4	0.794923	1	1.25798	0.000255493	0.25	1	2	28	0.587825	1
GO Molecular Function	GO:0016206	catechol O-methyltransferase activity	4	0.794923	1	1.25798	0.000255493	0.25	1	2	2	0.587825	1
GO Molecular Function	GO:0017153	sodium:dicarboxylate symporter activity	4	0.794923	1	1.25798	0.000255493	0.25	1	3	10	0.587825	1
GO Molecular Function	GO:0019855	calcium channel inhibitor activity	4	0.794923	1	1.25798	0.000255493	0.25	1	2	8	0.587825	1
GO Molecular Function	GO:0033743	peptide-methionine (R)-S-oxide reductase activity	4	0.794923	1	1.25798	0.000255493	0.25	1	1	3	0.587825	1
GO Molecular Function	GO:0034437	glycoprotein transporter activity	4	0.794923	1	1.25798	0.000255493	0.25	1	1	2	0.587825	1
GO Molecular Function	GO:0036041	long-chain fatty acid binding	4	0.794923	1	1.25798	0.000255493	0.25	1	3	12	0.587825	1
GO Molecular Function	GO:0038025	reelin receptor activity	4	0.794923	1	1.25798	0.000255493	0.25	1	1	2	0.587825	1
GO Molecular Function	GO:0038062	protein tyrosine kinase collagen receptor activity	4	0.794923	1	1.25798	0.000255493	0.25	1	1	2	0.587825	1
GO Molecular Function	GO:0042007	interleukin-18 binding	4	0.794923	1	1.25798	0.000255493	0.25	1	1	1	0.587825	1
GO Molecular Function	GO:0042288	MHC class I protein binding	4	0.794923	1	1.25798	0.000255493	0.25	1	2	14	0.587825	1
GO Molecular Function	GO:0046976	histone methyltransferase activity (H3-K27 specific)	4	0.794923	1	1.25798	0.000255493	0.25	1	1	3	0.587825	1
GO Molecular Function	GO:0048020	CCR chemokine receptor binding	4	0.794923	1	1.25798	0.000255493	0.25	1	3	14	0.587825	1
GO Molecular Function	GO:0050031	L-pipecolate oxidase activity	4	0.794923	1	1.25798	0.000255493	0.25	1	1	1	0.587825	1
GO Molecular Function	GO:1901677	phosphate transmembrane transporter activity	4	0.794923	1	1.25798	0.000255493	0.25	1	3	19	0.587825	1
GO Molecular Function	GO:0019209	kinase activator activity	36	7.1543	7	0.978432	0.00178845	0.194444	4	11	47	0.592075	1
GO Molecular Function	GO:0030295	protein kinase activator activity	36	7.1543	7	0.978432	0.00178845	0.194444	4	11	40	0.592075	1
GO Molecular Function	GO:0042054	histone methyltransferase activity	57	11.3277	11	0.971075	0.00281042	0.192983	7	19	50	0.596131	1
GO Molecular Function	GO:0005119	smoothened binding	31	6.16065	6	0.973923	0.00153296	0.193548	1	1	3	0.600269	1
GO Molecular Function	GO:0097108	hedgehog family protein binding	31	6.16065	6	0.973923	0.00153296	0.193548	1	1	3	0.600269	1
GO Molecular Function	GO:0048037	cofactor binding	109	21.6616	21	0.969456	0.00536536	0.192661	15	44	258	0.601436	1
GO Molecular Function	GO:0004527	exonuclease activity	73	14.5073	14	0.965029	0.0035769	0.191781	5	17	72	0.605821	1
GO Molecular Function	GO:0017134	fibroblast growth factor binding	26	5.167	5	0.96768	0.00127747	0.192308	4	7	21	0.610597	1
GO Molecular Function	GO:0008092	cytoskeletal protein binding	407	80.8834	79	0.976715	0.020184	0.194103	41	160	691	0.613344	1
GO Molecular Function	GO:0004930	G-protein coupled receptor activity	177	35.1753	34	0.966587	0.00868677	0.19209	27	79	817	0.617876	1
GO Molecular Function	GO:0005522	profilin binding	10	1.98731	2	1.00639	0.000510986	0.2	1	3	8	0.620406	1
GO Molecular Function	GO:0008139	nuclear localization sequence binding	10	1.98731	2	1.00639	0.000510986	0.2	2	5	9	0.620406	1
GO Molecular Function	GO:0044183	protein binding involved in protein folding	10	1.98731	2	1.00639	0.000510986	0.2	1	2	6	0.620406	1
GO Molecular Function	GO:0051019	mitogen-activated protein kinase binding	10	1.98731	2	1.00639	0.000510986	0.2	2	6	16	0.620406	1
GO Molecular Function	GO:0004860	protein kinase inhibitor activity	58	11.5264	11	0.954333	0.00281042	0.189655	4	16	54	0.620928	1
GO Molecular Function	GO:0000030	mannosyltransferase activity	21	4.17334	4	0.958464	0.00102197	0.190476	2	4	17	0.624236	1
GO Molecular Function	GO:0070097	delta-catenin binding	21	4.17334	4	0.958464	0.00102197	0.190476	1	2	7	0.624236	1
GO Molecular Function	GO:0008201	heparin binding	95	18.8794	18	0.95342	0.00459888	0.189474	11	28	133	0.630231	1
GO Molecular Function	GO:0030374	ligand-dependent nuclear receptor transcription coactivator activity	90	17.8858	17	0.950477	0.00434338	0.188889	8	18	45	0.634345	1
GO Molecular Function	GO:0005509	calcium ion binding	451	89.6275	87	0.970684	0.0222279	0.192905	50	156	680	0.641846	1
GO Molecular Function	GO:0003906	DNA-(apurinic or apyrimidinic site) lyase activity	16	3.17969	3	0.943488	0.000766479	0.1875	1	1	12	0.643541	1
GO Molecular Function	GO:0005520	insulin-like growth factor binding	16	3.17969	3	0.943488	0.000766479	0.1875	3	6	25	0.643541	1
GO Molecular Function	GO:0016655	oxidoreductase activity, acting on NAD(P)H, quinone or similar compound as acceptor	16	3.17969	3	0.943488	0.000766479	0.1875	2	7	61	0.643541	1
GO Molecular Function	GO:0034039	8-oxo-7,8-dihydroguanine DNA N-glycosylase activity	16	3.17969	3	0.943488	0.000766479	0.1875	1	1	1	0.643541	1
GO Molecular Function	GO:0051287	NAD binding	16	3.17969	3	0.943488	0.000766479	0.1875	3	11	46	0.643541	1
GO Molecular Function	GO:0004867	serine-type endopeptidase inhibitor activity	27	5.36573	5	0.93184	0.00127747	0.185185	5	9	94	0.646026	1
GO Molecular Function	GO:0045294	alpha-catenin binding	33	6.55811	6	0.914898	0.00153296	0.181818	3	3	8	0.664587	1
GO Molecular Function	GO:0005057	receptor signaling protein activity	118	23.4502	22	0.938158	0.00562085	0.186441	16	35	105	0.667288	1
GO Molecular Function	GO:0003681	bent DNA binding	5	0.993653	1	1.00639	0.000255493	0.2	1	1	1	0.669754	1
GO Molecular Function	GO:0004012	phospholipid-translocating ATPase activity	5	0.993653	1	1.00639	0.000255493	0.2	1	4	15	0.669754	1
GO Molecular Function	GO:0004117	calmodulin-dependent cyclic-nucleotide phosphodiesterase activity	5	0.993653	1	1.00639	0.000255493	0.2	1	1	3	0.669754	1
GO Molecular Function	GO:0004448	isocitrate dehydrogenase activity	5	0.993653	1	1.00639	0.000255493	0.2	1	4	5	0.669754	1
GO Molecular Function	GO:0004576	oligosaccharyl transferase activity	5	0.993653	1	1.00639	0.000255493	0.2	1	3	9	0.669754	1
GO Molecular Function	GO:0004579	dolichyl-diphosphooligosaccharide-protein glycotransferase activity	5	0.993653	1	1.00639	0.000255493	0.2	1	3	8	0.669754	1
GO Molecular Function	GO:0004691	cAMP-dependent protein kinase activity	5	0.993653	1	1.00639	0.000255493	0.2	1	1	7	0.669754	1
GO Molecular Function	GO:0005042	netrin receptor activity	5	0.993653	1	1.00639	0.000255493	0.2	1	2	2	0.669754	1
GO Molecular Function	GO:0005052	peroxisome matrix targeting signal-1 binding	5	0.993653	1	1.00639	0.000255493	0.2	1	1	2	0.669754	1
GO Molecular Function	GO:0008430	selenium binding	5	0.993653	1	1.00639	0.000255493	0.2	1	4	12	0.669754	1
GO Molecular Function	GO:0008817	cob(I)yrinic acid a,c-diamide adenosyltransferase activity	5	0.993653	1	1.00639	0.000255493	0.2	1	1	1	0.669754	1
GO Molecular Function	GO:0015232	heme transporter activity	5	0.993653	1	1.00639	0.000255493	0.2	1	3	8	0.669754	1
GO Molecular Function	GO:0015278	calcium-release channel activity	5	0.993653	1	1.00639	0.000255493	0.2	1	4	14	0.669754	1
GO Molecular Function	GO:0015562	efflux transmembrane transporter activity	5	0.993653	1	1.00639	0.000255493	0.2	1	2	4	0.669754	1
GO Molecular Function	GO:0016274	protein-arginine N-methyltransferase activity	5	0.993653	1	1.00639	0.000255493	0.2	1	3	9	0.669754	1
GO Molecular Function	GO:0016413	O-acetyltransferase activity	5	0.993653	1	1.00639	0.000255493	0.2	1	3	6	0.669754	1
GO Molecular Function	GO:0016671	oxidoreductase activity, acting on a sulfur group of donors, disulfide as acceptor	5	0.993653	1	1.00639	0.000255493	0.2	1	2	8	0.669754	1
GO Molecular Function	GO:0016877	ligase activity, forming carbon-sulfur bonds	5	0.993653	1	1.00639	0.000255493	0.2	1	2	29	0.669754	1
GO Molecular Function	GO:0016878	acid-thiol ligase activity	5	0.993653	1	1.00639	0.000255493	0.2	1	2	20	0.669754	1
GO Molecular Function	GO:0017166	vinculin binding	5	0.993653	1	1.00639	0.000255493	0.2	1	4	11	0.669754	1
GO Molecular Function	GO:0030229	very-low-density lipoprotein particle receptor activity	5	0.993653	1	1.00639	0.000255493	0.2	1	2	4	0.669754	1
GO Molecular Function	GO:0035259	glucocorticoid receptor binding	5	0.993653	1	1.00639	0.000255493	0.2	1	2	8	0.669754	1
GO Molecular Function	GO:0042379	chemokine receptor binding	5	0.993653	1	1.00639	0.000255493	0.2	1	4	57	0.669754	1
GO Molecular Function	GO:0047555	3',5'-cyclic-GMP phosphodiesterase activity	5	0.993653	1	1.00639	0.000255493	0.2	1	1	10	0.669754	1
GO Molecular Function	GO:0048019	receptor antagonist activity	5	0.993653	1	1.00639	0.000255493	0.2	1	2	10	0.669754	1
GO Molecular Function	GO:0048101	calcium- and calmodulin-regulated 3',5'-cyclic-GMP phosphodiesterase activity	5	0.993653	1	1.00639	0.000255493	0.2	1	1	1	0.669754	1
GO Molecular Function	GO:0048156	tau protein binding	5	0.993653	1	1.00639	0.000255493	0.2	1	3	8	0.669754	1
GO Molecular Function	GO:0050453	cob(II)alamin reductase activity	5	0.993653	1	1.00639	0.000255493	0.2	1	1	1	0.669754	1
GO Molecular Function	GO:0050656	3'-phosphoadenosine 5'-phosphosulfate binding	5	0.993653	1	1.00639	0.000255493	0.2	1	3	6	0.669754	1
GO Molecular Function	GO:0051184	cofactor transporter activity	5	0.993653	1	1.00639	0.000255493	0.2	1	3	18	0.669754	1
GO Molecular Function	GO:1901612	cardiolipin binding	5	0.993653	1	1.00639	0.000255493	0.2	1	1	1	0.669754	1
GO Molecular Function	GO:0005007	fibroblast growth factor-activated receptor activity	11	2.18604	2	0.914898	0.000510986	0.181818	2	3	5	0.674189	1
GO Molecular Function	GO:0005095	GTPase inhibitor activity	11	2.18604	2	0.914898	0.000510986	0.181818	1	5	13	0.674189	1
GO Molecular Function	GO:0005487	nucleocytoplasmic transporter activity	11	2.18604	2	0.914898	0.000510986	0.181818	2	4	13	0.674189	1
GO Molecular Function	GO:0016620	oxidoreductase activity, acting on the aldehyde or oxo group of donors, NAD or NADP as acceptor	11	2.18604	2	0.914898	0.000510986	0.181818	2	5	29	0.674189	1
GO Molecular Function	GO:0035613	RNA stem-loop binding	11	2.18604	2	0.914898	0.000510986	0.181818	2	2	4	0.674189	1
GO Molecular Function	GO:0030234	enzyme regulator activity	614	122.021	118	0.96705	0.0301482	0.192182	55	209	989	0.676097	1
GO Molecular Function	GO:0016247	channel regulator activity	87	17.2896	16	0.925414	0.00408789	0.183908	10	31	88	0.677427	1
GO Molecular Function	GO:0005201	extracellular matrix structural constituent	28	5.56446	5	0.89856	0.00127747	0.178571	5	18	82	0.679351	1
GO Molecular Function	GO:0042974	retinoic acid receptor binding	39	7.75049	7	0.903168	0.00178845	0.179487	4	7	43	0.680883	1
GO Molecular Function	GO:0004683	calmodulin-dependent protein kinase activity	17	3.37842	3	0.887989	0.000766479	0.176471	2	6	20	0.685909	1
GO Molecular Function	GO:0008112	nicotinamide N-methyltransferase activity	17	3.37842	3	0.887989	0.000766479	0.176471	1	1	1	0.685909	1
GO Molecular Function	GO:0016903	oxidoreductase activity, acting on the aldehyde or oxo group of donors	17	3.37842	3	0.887989	0.000766479	0.176471	3	7	41	0.685909	1
GO Molecular Function	GO:0046923	ER retention sequence binding	17	3.37842	3	0.887989	0.000766479	0.176471	1	2	4	0.685909	1
GO Molecular Function	GO:0015405	P-P-bond-hydrolysis-driven transmembrane transporter activity	61	12.1226	11	0.907398	0.00281042	0.180328	5	19	109	0.690369	1
GO Molecular Function	GO:0005242	inward rectifier potassium channel activity	23	4.57081	4	0.875119	0.00102197	0.173913	3	7	21	0.6984	1
GO Molecular Function	GO:0043024	ribosomal small subunit binding	23	4.57081	4	0.875119	0.00102197	0.173913	2	3	9	0.6984	1
GO Molecular Function	GO:0008565	protein transporter activity	83	16.4946	15	0.909386	0.0038324	0.180723	8	23	83	0.701905	1
GO Molecular Function	GO:0005113	patched binding	40	7.94923	7	0.880589	0.00178845	0.175	2	6	8	0.70758	1
GO Molecular Function	GO:0004518	nuclease activity	110	21.8604	20	0.914898	0.00510986	0.181818	8	29	176	0.708439	1
GO Molecular Function	GO:0005109	frizzled binding	51	10.1353	9	0.887989	0.00229944	0.176471	6	18	35	0.708722	1
GO Molecular Function	GO:0005089	Rho guanyl-nucleotide exchange factor activity	29	5.76319	5	0.867575	0.00127747	0.172414	5	13	75	0.710503	1
GO Molecular Function	GO:0051427	hormone receptor binding	184	36.5664	34	0.929814	0.00868677	0.184783	15	43	148	0.711068	1
GO Molecular Function	GO:0019210	kinase inhibitor activity	62	12.3213	11	0.892763	0.00281042	0.177419	4	18	57	0.711711	1
GO Molecular Function	GO:0005088	Ras guanyl-nucleotide exchange factor activity	46	9.14161	8	0.875119	0.00204395	0.173913	7	20	118	0.71985	1
GO Molecular Function	GO:0004112	cyclic-nucleotide phosphodiesterase activity	12	2.38477	2	0.838656	0.000510986	0.166667	2	6	26	0.721593	1
GO Molecular Function	GO:0004114	3',5'-cyclic-nucleotide phosphodiesterase activity	12	2.38477	2	0.838656	0.000510986	0.166667	2	6	25	0.721593	1
GO Molecular Function	GO:0005154	epidermal growth factor receptor binding	12	2.38477	2	0.838656	0.000510986	0.166667	1	1	20	0.721593	1
GO Molecular Function	GO:0008137	NADH dehydrogenase (ubiquinone) activity	12	2.38477	2	0.838656	0.000510986	0.166667	1	5	47	0.721593	1
GO Molecular Function	GO:0010736	serum response element binding	12	2.38477	2	0.838656	0.000510986	0.166667	2	2	2	0.721593	1
GO Molecular Function	GO:0016769	transferase activity, transferring nitrogenous groups	12	2.38477	2	0.838656	0.000510986	0.166667	2	6	26	0.721593	1
GO Molecular Function	GO:0051117	ATPase binding	12	2.38477	2	0.838656	0.000510986	0.166667	2	7	29	0.721593	1
GO Molecular Function	GO:0004445	inositol-polyphosphate 5-phosphatase activity	18	3.57715	3	0.838656	0.000766479	0.166667	2	4	7	0.724382	1
GO Molecular Function	GO:0019843	rRNA binding	18	3.57715	3	0.838656	0.000766479	0.166667	1	5	30	0.724382	1
GO Molecular Function	GO:0030506	ankyrin binding	18	3.57715	3	0.838656	0.000766479	0.166667	2	7	19	0.724382	1
GO Molecular Function	GO:0046030	inositol trisphosphate phosphatase activity	18	3.57715	3	0.838656	0.000766479	0.166667	2	4	9	0.724382	1
GO Molecular Function	GO:0003774	motor activity	79	15.6997	14	0.891736	0.0035769	0.177215	9	34	134	0.72689	1
GO Molecular Function	GO:0003725	double-stranded RNA binding	63	12.52	11	0.878592	0.00281042	0.174603	5	13	52	0.732098	1
GO Molecular Function	GO:0001530	lipopolysaccharide binding	6	1.19238	1	0.838656	0.000255493	0.166667	1	1	14	0.7354	1
GO Molecular Function	GO:0001784	phosphotyrosine binding	6	1.19238	1	0.838656	0.000255493	0.166667	1	5	13	0.7354	1
GO Molecular Function	GO:0003841	1-acylglycerol-3-phosphate O-acyltransferase activity	6	1.19238	1	0.838656	0.000255493	0.166667	1	3	10	0.7354	1
GO Molecular Function	GO:0004089	carbonate dehydratase activity	6	1.19238	1	0.838656	0.000255493	0.166667	1	3	13	0.7354	1
GO Molecular Function	GO:0004372	glycine hydroxymethyltransferase activity	6	1.19238	1	0.838656	0.000255493	0.166667	1	1	2	0.7354	1
GO Molecular Function	GO:0004699	calcium-independent protein kinase C activity	6	1.19238	1	0.838656	0.000255493	0.166667	1	1	2	0.7354	1
GO Molecular Function	GO:0005161	platelet-derived growth factor receptor binding	6	1.19238	1	0.838656	0.000255493	0.166667	1	2	14	0.7354	1
GO Molecular Function	GO:0005540	hyaluronic acid binding	6	1.19238	1	0.838656	0.000255493	0.166667	1	4	21	0.7354	1
GO Molecular Function	GO:0005545	1-phosphatidylinositol binding	6	1.19238	1	0.838656	0.000255493	0.166667	1	4	21	0.7354	1
GO Molecular Function	GO:0008191	metalloendopeptidase inhibitor activity	6	1.19238	1	0.838656	0.000255493	0.166667	1	4	14	0.7354	1
GO Molecular Function	GO:0008239	dipeptidyl-peptidase activity	6	1.19238	1	0.838656	0.000255493	0.166667	1	2	10	0.7354	1
GO Molecular Function	GO:0008732	L-allo-threonine aldolase activity	6	1.19238	1	0.838656	0.000255493	0.166667	1	1	2	0.7354	1
GO Molecular Function	GO:0015101	organic cation transmembrane transporter activity	6	1.19238	1	0.838656	0.000255493	0.166667	1	3	19	0.7354	1
GO Molecular Function	GO:0016411	acylglycerol O-acyltransferase activity	6	1.19238	1	0.838656	0.000255493	0.166667	1	3	17	0.7354	1
GO Molecular Function	GO:0031624	ubiquitin conjugating enzyme binding	6	1.19238	1	0.838656	0.000255493	0.166667	1	3	8	0.7354	1
GO Molecular Function	GO:0032454	histone demethylase activity (H3-K9 specific)	6	1.19238	1	0.838656	0.000255493	0.166667	1	2	5	0.7354	1
GO Molecular Function	GO:0033925	mannosyl-glycoprotein endo-beta-N-acetylglucosaminidase activity	6	1.19238	1	0.838656	0.000255493	0.166667	1	1	1	0.7354	1
GO Molecular Function	GO:0034189	very-low-density lipoprotein particle binding	6	1.19238	1	0.838656	0.000255493	0.166667	1	2	2	0.7354	1
GO Molecular Function	GO:0035252	UDP-xylosyltransferase activity	6	1.19238	1	0.838656	0.000255493	0.166667	1	2	5	0.7354	1
GO Molecular Function	GO:0035276	ethanol binding	6	1.19238	1	0.838656	0.000255493	0.166667	1	1	2	0.7354	1
GO Molecular Function	GO:0042287	MHC protein binding	6	1.19238	1	0.838656	0.000255493	0.166667	1	3	21	0.7354	1
GO Molecular Function	GO:0043015	gamma-tubulin binding	6	1.19238	1	0.838656	0.000255493	0.166667	1	4	19	0.7354	1
GO Molecular Function	GO:0050510	N-acetylgalactosaminyl-proteoglycan 3-beta-glucuronosyltransferase activity	6	1.19238	1	0.838656	0.000255493	0.166667	1	3	4	0.7354	1
GO Molecular Function	GO:0000993	RNA polymerase II core binding	30	5.96192	5	0.838656	0.00127747	0.166667	2	6	10	0.739456	1
GO Molecular Function	GO:0005249	voltage-gated potassium channel activity	134	26.6299	24	0.901242	0.00613183	0.179104	12	36	85	0.747935	1
GO Molecular Function	GO:0004519	endonuclease activity	36	7.1543	6	0.838656	0.00153296	0.166667	3	11	105	0.747939	1
GO Molecular Function	GO:0016896	exoribonuclease activity, producing 5'-phosphomonoesters	36	7.1543	6	0.838656	0.00153296	0.166667	3	6	25	0.747939	1
GO Molecular Function	GO:0019887	protein kinase regulator activity	102	20.2705	18	0.887989	0.00459888	0.176471	8	33	112	0.750427	1
GO Molecular Function	GO:1901981	phosphatidylinositol phosphate binding	64	12.7188	11	0.864864	0.00281042	0.171875	7	20	72	0.751513	1
GO Molecular Function	GO:0008081	phosphoric diester hydrolase activity	42	8.34669	7	0.838656	0.00178845	0.166667	6	21	92	0.756362	1
GO Molecular Function	GO:0017046	peptide hormone binding	19	3.77588	3	0.794516	0.000766479	0.157895	1	7	32	0.759062	1
GO Molecular Function	GO:0052745	inositol phosphate phosphatase activity	19	3.77588	3	0.794516	0.000766479	0.157895	2	5	17	0.759062	1
GO Molecular Function	GO:0050750	low-density lipoprotein particle receptor binding	25	4.96827	4	0.80511	0.00102197	0.16	2	4	13	0.761404	1
GO Molecular Function	GO:0008332	low voltage-gated calcium channel activity	13	2.5835	2	0.774144	0.000510986	0.153846	2	2	3	0.763028	1
GO Molecular Function	GO:0016248	channel inhibitor activity	13	2.5835	2	0.774144	0.000510986	0.153846	2	7	24	0.763028	1
GO Molecular Function	GO:0016758	transferase activity, transferring hexosyl groups	103	20.4693	18	0.879368	0.00459888	0.174757	9	32	191	0.765307	1
GO Molecular Function	GO:0043175	RNA polymerase core enzyme binding	31	6.16065	5	0.811603	0.00127747	0.16129	2	7	12	0.766223	1
GO Molecular Function	GO:0003777	microtubule motor activity	54	10.7315	9	0.838656	0.00229944	0.166667	6	26	80	0.772491	1
GO Molecular Function	GO:0004713	protein tyrosine kinase activity	104	20.668	18	0.870912	0.00459888	0.173077	13	36	145	0.779584	1
GO Molecular Function	GO:0035254	glutamate receptor binding	60	11.9238	10	0.838656	0.00255493	0.166667	7	12	24	0.780104	1
GO Molecular Function	GO:0005085	guanyl-nucleotide exchange factor activity	77	15.3023	13	0.849548	0.00332141	0.168831	12	36	186	0.785664	1
GO Molecular Function	GO:0000155	phosphorelay sensor kinase activity	7	1.39111	1	0.718848	0.000255493	0.142857	1	4	8	0.788	1
GO Molecular Function	GO:0003828	alpha-N-acetylneuraminate alpha-2,8-sialyltransferase activity	7	1.39111	1	0.718848	0.000255493	0.142857	1	2	5	0.788	1
GO Molecular Function	GO:0004045	aminoacyl-tRNA hydrolase activity	7	1.39111	1	0.718848	0.000255493	0.142857	1	2	4	0.788	1
GO Molecular Function	GO:0004359	glutaminase activity	7	1.39111	1	0.718848	0.000255493	0.142857	1	2	2	0.788	1
GO Molecular Function	GO:0004521	endoribonuclease activity	7	1.39111	1	0.718848	0.000255493	0.142857	1	4	47	0.788	1
GO Molecular Function	GO:0004673	protein histidine kinase activity	7	1.39111	1	0.718848	0.000255493	0.142857	1	4	9	0.788	1
GO Molecular Function	GO:0004707	MAP kinase activity	7	1.39111	1	0.718848	0.000255493	0.142857	1	4	14	0.788	1
GO Molecular Function	GO:0005159	insulin-like growth factor receptor binding	7	1.39111	1	0.718848	0.000255493	0.142857	1	3	14	0.788	1
GO Molecular Function	GO:0008140	cAMP response element binding protein binding	7	1.39111	1	0.718848	0.000255493	0.142857	1	3	8	0.788	1
GO Molecular Function	GO:0008312	7S RNA binding	7	1.39111	1	0.718848	0.000255493	0.142857	1	1	7	0.788	1
GO Molecular Function	GO:0008409	5'-3' exonuclease activity	7	1.39111	1	0.718848	0.000255493	0.142857	1	2	11	0.788	1
GO Molecular Function	GO:0016638	oxidoreductase activity, acting on the CH-NH2 group of donors	7	1.39111	1	0.718848	0.000255493	0.142857	1	5	20	0.788	1
GO Molecular Function	GO:0016832	aldehyde-lyase activity	7	1.39111	1	0.718848	0.000255493	0.142857	1	2	9	0.788	1
GO Molecular Function	GO:0016891	endoribonuclease activity, producing 5'-phosphomonoesters	7	1.39111	1	0.718848	0.000255493	0.142857	1	4	24	0.788	1
GO Molecular Function	GO:0030955	potassium ion binding	7	1.39111	1	0.718848	0.000255493	0.142857	1	2	7	0.788	1
GO Molecular Function	GO:0031420	alkali metal ion binding	7	1.39111	1	0.718848	0.000255493	0.142857	1	2	10	0.788	1
GO Molecular Function	GO:0033691	sialic acid binding	7	1.39111	1	0.718848	0.000255493	0.142857	1	2	8	0.788	1
GO Molecular Function	GO:0043874	acireductone synthase activity	7	1.39111	1	0.718848	0.000255493	0.142857	1	1	1	0.788	1
GO Molecular Function	GO:0070087	chromo shadow domain binding	7	1.39111	1	0.718848	0.000255493	0.142857	1	1	6	0.788	1
GO Molecular Function	GO:0070579	methylcytosine dioxygenase activity	7	1.39111	1	0.718848	0.000255493	0.142857	1	3	4	0.788	1
GO Molecular Function	GO:0070700	BMP receptor binding	7	1.39111	1	0.718848	0.000255493	0.142857	1	1	5	0.788	1
GO Molecular Function	GO:0097109	neuroligin family protein binding	7	1.39111	1	0.718848	0.000255493	0.142857	1	2	2	0.788	1
GO Molecular Function	GO:1901618	organic hydroxy compound transmembrane transporter activity	7	1.39111	1	0.718848	0.000255493	0.142857	1	5	23	0.788	1
GO Molecular Function	GO:0003684	damaged DNA binding	26	5.167	4	0.774144	0.00102197	0.153846	2	8	50	0.788823	1
GO Molecular Function	GO:0008022	protein C-terminus binding	191	37.9575	34	0.895737	0.00868677	0.17801	18	48	159	0.789907	1
GO Molecular Function	GO:0008187	poly-pyrimidine tract binding	20	3.97461	3	0.75479	0.000766479	0.15	1	4	10	0.790118	1
GO Molecular Function	GO:0008266	poly(U) RNA binding	20	3.97461	3	0.75479	0.000766479	0.15	1	4	8	0.790118	1
GO Molecular Function	GO:0042800	histone methyltransferase activity (H3-K4 specific)	20	3.97461	3	0.75479	0.000766479	0.15	2	5	12	0.790118	1
GO Molecular Function	GO:0035255	ionotropic glutamate receptor binding	55	10.9302	9	0.823408	0.00229944	0.163636	6	9	15	0.791357	1
GO Molecular Function	GO:0004532	exoribonuclease activity	38	7.55176	6	0.794516	0.00153296	0.157895	3	7	26	0.7945	1
GO Molecular Function	GO:0005518	collagen binding	38	7.55176	6	0.794516	0.00153296	0.157895	4	8	48	0.7945	1
GO Molecular Function	GO:0004601	peroxidase activity	14	2.78223	2	0.718848	0.000510986	0.142857	2	7	41	0.798994	1
GO Molecular Function	GO:0005164	tumor necrosis factor receptor binding	14	2.78223	2	0.718848	0.000510986	0.142857	1	5	26	0.798994	1
GO Molecular Function	GO:0015016	[heparan sulfate]-glucosamine N-sulfotransferase activity	14	2.78223	2	0.718848	0.000510986	0.142857	2	3	4	0.798994	1
GO Molecular Function	GO:0034483	heparan sulfate sulfotransferase activity	14	2.78223	2	0.718848	0.000510986	0.142857	2	3	11	0.798994	1
GO Molecular Function	GO:0051536	iron-sulfur cluster binding	14	2.78223	2	0.718848	0.000510986	0.142857	2	10	61	0.798994	1
GO Molecular Function	GO:0015485	cholesterol binding	44	8.74415	7	0.800535	0.00178845	0.159091	2	8	33	0.798995	1
GO Molecular Function	GO:0000175	3'-5'-exoribonuclease activity	33	6.55811	5	0.762415	0.00127747	0.151515	2	5	23	0.813392	1
GO Molecular Function	GO:0004535	poly(A)-specific ribonuclease activity	33	6.55811	5	0.762415	0.00127747	0.151515	2	5	11	0.813392	1
GO Molecular Function	GO:0016835	carbon-oxygen lyase activity	27	5.36573	4	0.745472	0.00102197	0.148148	2	8	58	0.813657	1
GO Molecular Function	GO:0008408	3'-5' exonuclease activity	39	7.75049	6	0.774144	0.00153296	0.153846	3	9	42	0.815158	1
GO Molecular Function	GO:0016796	exonuclease activity, active with either ribo- or deoxyribonucleic acids and producing 5'-phosphomonoesters	39	7.75049	6	0.774144	0.00153296	0.153846	3	8	35	0.815158	1
GO Molecular Function	GO:0004708	MAP kinase kinase activity	21	4.17334	3	0.718848	0.000766479	0.142857	3	7	16	0.817765	1
GO Molecular Function	GO:0005546	phosphatidylinositol-4,5-bisphosphate binding	21	4.17334	3	0.718848	0.000766479	0.142857	2	8	32	0.817765	1
GO Molecular Function	GO:0019104	DNA N-glycosylase activity	21	4.17334	3	0.718848	0.000766479	0.142857	1	3	13	0.817765	1
GO Molecular Function	GO:0051059	NF-kappaB binding	21	4.17334	3	0.718848	0.000766479	0.142857	2	8	25	0.817765	1
GO Molecular Function	GO:0019899	enzyme binding	1011	200.917	190	0.945666	0.0485437	0.187933	93	307	1170	0.821941	1
GO Molecular Function	GO:0019902	phosphatase binding	74	14.7061	12	0.81599	0.00306592	0.162162	7	32	129	0.824518	1
GO Molecular Function	GO:0016820	hydrolase activity, acting on acid anhydrides, catalyzing transmembrane movement of substances	57	11.3277	9	0.794516	0.00229944	0.157895	4	18	105	0.825578	1
GO Molecular Function	GO:0042626	ATPase activity, coupled to transmembrane movement of substances	57	11.3277	9	0.794516	0.00229944	0.157895	4	18	102	0.825578	1
GO Molecular Function	GO:0043492	ATPase activity, coupled to movement of substances	57	11.3277	9	0.794516	0.00229944	0.157895	4	18	103	0.825578	1
GO Molecular Function	GO:0016279	protein-lysine N-methyltransferase activity	63	12.52	10	0.79872	0.00255493	0.15873	6	18	47	0.829734	1
GO Molecular Function	GO:0004177	aminopeptidase activity	15	2.98096	2	0.670925	0.000510986	0.133333	2	9	35	0.830028	1
GO Molecular Function	GO:0001618	virus receptor activity	8	1.58984	1	0.628992	0.000255493	0.125	1	3	28	0.830146	1
GO Molecular Function	GO:0004115	3',5'-cyclic-AMP phosphodiesterase activity	8	1.58984	1	0.628992	0.000255493	0.125	1	4	9	0.830146	1
GO Molecular Function	GO:0004723	calcium-dependent protein serine/threonine phosphatase activity	8	1.58984	1	0.628992	0.000255493	0.125	1	2	6	0.830146	1
GO Molecular Function	GO:0004953	icosanoid receptor activity	8	1.58984	1	0.628992	0.000255493	0.125	1	3	16	0.830146	1
GO Molecular Function	GO:0004954	prostanoid receptor activity	8	1.58984	1	0.628992	0.000255493	0.125	1	3	12	0.830146	1
GO Molecular Function	GO:0004955	prostaglandin receptor activity	8	1.58984	1	0.628992	0.000255493	0.125	1	3	11	0.830146	1
GO Molecular Function	GO:0008179	adenylate cyclase binding	8	1.58984	1	0.628992	0.000255493	0.125	1	4	7	0.830146	1
GO Molecular Function	GO:0008373	sialyltransferase activity	8	1.58984	1	0.628992	0.000255493	0.125	1	3	20	0.830146	1
GO Molecular Function	GO:0016893	endonuclease activity, active with either ribo- or deoxyribonucleic acids and producing 5'-phosphomonoesters	8	1.58984	1	0.628992	0.000255493	0.125	1	5	37	0.830146	1
GO Molecular Function	GO:0017128	phospholipid scramblase activity	8	1.58984	1	0.628992	0.000255493	0.125	1	1	4	0.830146	1
GO Molecular Function	GO:0032422	purine-rich negative regulatory element binding	8	1.58984	1	0.628992	0.000255493	0.125	1	1	2	0.830146	1
GO Molecular Function	GO:0070530	K63-linked polyubiquitin binding	8	1.58984	1	0.628992	0.000255493	0.125	1	6	10	0.830146	1
GO Molecular Function	GO:0019208	phosphatase regulator activity	97	19.2769	16	0.83001	0.00408789	0.164948	5	23	72	0.832027	1
GO Molecular Function	GO:0001948	glycoprotein binding	40	7.94923	6	0.75479	0.00153296	0.15	4	14	59	0.834142	1
GO Molecular Function	GO:0008170	N-methyltransferase activity	86	17.0908	14	0.819152	0.0035769	0.162791	8	23	69	0.834423	1
GO Molecular Function	GO:0004540	ribonuclease activity	46	9.14161	7	0.765729	0.00178845	0.152174	4	12	76	0.835693	1
GO Molecular Function	GO:0030170	pyridoxal phosphate binding	46	9.14161	7	0.765729	0.00178845	0.152174	4	11	55	0.835693	1
GO Molecular Function	GO:0016799	hydrolase activity, hydrolyzing N-glycosyl compounds	22	4.37207	3	0.686173	0.000766479	0.136364	1	4	22	0.842248	1
GO Molecular Function	GO:0030594	neurotransmitter receptor activity	22	4.37207	3	0.686173	0.000766479	0.136364	3	13	74	0.842248	1
GO Molecular Function	GO:0030971	receptor tyrosine kinase binding	22	4.37207	3	0.686173	0.000766479	0.136364	2	10	37	0.842248	1
GO Molecular Function	GO:0034595	phosphatidylinositol phosphate 5-phosphatase activity	22	4.37207	3	0.686173	0.000766479	0.136364	2	5	10	0.842248	1
GO Molecular Function	GO:0016491	oxidoreductase activity	349	69.357	62	0.893926	0.0158406	0.17765	33	117	715	0.856676	1
GO Molecular Function	GO:0008017	microtubule binding	111	22.0591	18	0.81599	0.00459888	0.162162	10	42	153	0.862841	1
GO Molecular Function	GO:0016791	phosphatase activity	161	31.9956	27	0.843865	0.00689831	0.167702	14	63	259	0.863126	1
GO Molecular Function	GO:0001222	transcription corepressor binding	23	4.57081	3	0.65634	0.000766479	0.130435	1	2	4	0.863825	1
GO Molecular Function	GO:0008483	transaminase activity	9	1.78858	1	0.559104	0.000255493	0.111111	1	5	24	0.863915	1
GO Molecular Function	GO:0016775	phosphotransferase activity, nitrogenous group as acceptor	9	1.78858	1	0.559104	0.000255493	0.111111	1	5	14	0.863915	1
GO Molecular Function	GO:0017137	Rab GTPase binding	9	1.78858	1	0.559104	0.000255493	0.111111	1	5	51	0.863915	1
GO Molecular Function	GO:0030159	receptor signaling complex scaffold activity	9	1.78858	1	0.559104	0.000255493	0.111111	1	4	19	0.863915	1
GO Molecular Function	GO:0030675	Rac GTPase activator activity	9	1.78858	1	0.559104	0.000255493	0.111111	1	4	14	0.863915	1
GO Molecular Function	GO:0030898	actin-dependent ATPase activity	9	1.78858	1	0.559104	0.000255493	0.111111	1	2	10	0.863915	1
GO Molecular Function	GO:0031432	titin binding	9	1.78858	1	0.559104	0.000255493	0.111111	1	3	14	0.863915	1
GO Molecular Function	GO:0032036	myosin heavy chain binding	9	1.78858	1	0.559104	0.000255493	0.111111	1	2	7	0.863915	1
GO Molecular Function	GO:0034046	poly(G) RNA binding	9	1.78858	1	0.559104	0.000255493	0.111111	1	2	4	0.863915	1
GO Molecular Function	GO:0019888	protein phosphatase regulator activity	48	9.53907	7	0.733824	0.00178845	0.145833	4	20	63	0.866851	1
GO Molecular Function	GO:0004843	ubiquitin-specific protease activity	42	8.34669	6	0.718848	0.00153296	0.142857	5	20	55	0.867385	1
GO Molecular Function	GO:0043169	cation binding	3566	708.673	685	0.966595	0.175013	0.192092	298	941	4030	0.869022	1
GO Molecular Function	GO:0008276	protein methyltransferase activity	78	15.501	12	0.774144	0.00306592	0.153846	8	27	71	0.874592	1
GO Molecular Function	GO:0042826	histone deacetylase binding	135	26.8286	22	0.820019	0.00562085	0.162963	8	24	69	0.877353	1
GO Molecular Function	GO:0004715	non-membrane spanning protein tyrosine kinase activity	17	3.37842	2	0.591992	0.000510986	0.117647	2	9	46	0.879437	1
GO Molecular Function	GO:0017017	MAP kinase tyrosine/serine/threonine phosphatase activity	17	3.37842	2	0.591992	0.000510986	0.117647	1	5	13	0.879437	1
GO Molecular Function	GO:0033549	MAP kinase phosphatase activity	17	3.37842	2	0.591992	0.000510986	0.117647	1	5	14	0.879437	1
GO Molecular Function	GO:0019903	protein phosphatase binding	61	12.1226	9	0.742417	0.00229944	0.147541	5	22	88	0.880843	1
GO Molecular Function	GO:0042809	vitamin D receptor binding	43	8.54542	6	0.702131	0.00153296	0.139535	3	7	16	0.881808	1
GO Molecular Function	GO:0016209	antioxidant activity	24	4.76954	3	0.628992	0.000766479	0.125	3	12	68	0.882759	1
GO Molecular Function	GO:0004252	serine-type endopeptidase activity	37	7.35303	5	0.679991	0.00127747	0.135135	4	17	152	0.884711	1
GO Molecular Function	GO:0004721	phosphoprotein phosphatase activity	102	20.2705	16	0.789323	0.00408789	0.156863	6	46	169	0.884789	1
GO Molecular Function	GO:0004672	protein kinase activity	408	81.0821	72	0.887989	0.0183955	0.176471	53	159	593	0.886331	1
GO Molecular Function	GO:0042578	phosphoric ester hydrolase activity	203	40.3423	34	0.842787	0.00868677	0.167488	20	84	354	0.888587	1
GO Molecular Function	GO:0003950	NAD+ ADP-ribosyltransferase activity	10	1.98731	1	0.503194	0.000255493	0.1	1	3	24	0.890972	1
GO Molecular Function	GO:0004395	hexaprenyldihydroxybenzoate methyltransferase activity	10	1.98731	1	0.503194	0.000255493	0.1	1	1	1	0.890972	1
GO Molecular Function	GO:0004439	phosphatidylinositol-4,5-bisphosphate 5-phosphatase activity	10	1.98731	1	0.503194	0.000255493	0.1	1	3	6	0.890972	1
GO Molecular Function	GO:0005086	ARF guanyl-nucleotide exchange factor activity	10	1.98731	1	0.503194	0.000255493	0.1	1	5	19	0.890972	1
GO Molecular Function	GO:0005504	fatty acid binding	10	1.98731	1	0.503194	0.000255493	0.1	1	5	27	0.890972	1
GO Molecular Function	GO:0008200	ion channel inhibitor activity	10	1.98731	1	0.503194	0.000255493	0.1	1	6	23	0.890972	1
GO Molecular Function	GO:0008331	high voltage-gated calcium channel activity	10	1.98731	1	0.503194	0.000255493	0.1	1	4	7	0.890972	1
GO Molecular Function	GO:0008425	2-polyprenyl-6-methoxy-1,4-benzoquinone methyltransferase activity	10	1.98731	1	0.503194	0.000255493	0.1	1	1	1	0.890972	1
GO Molecular Function	GO:0008508	bile acid:sodium symporter activity	10	1.98731	1	0.503194	0.000255493	0.1	1	1	6	0.890972	1
GO Molecular Function	GO:0008689	3-demethylubiquinone-9 3-O-methyltransferase activity	10	1.98731	1	0.503194	0.000255493	0.1	1	1	1	0.890972	1
GO Molecular Function	GO:0015125	bile acid transmembrane transporter activity	10	1.98731	1	0.503194	0.000255493	0.1	1	1	8	0.890972	1
GO Molecular Function	GO:0015467	G-protein activated inward rectifier potassium channel activity	10	1.98731	1	0.503194	0.000255493	0.1	1	3	4	0.890972	1
GO Molecular Function	GO:0016836	hydro-lyase activity	10	1.98731	1	0.503194	0.000255493	0.1	1	6	42	0.890972	1
GO Molecular Function	GO:0030911	TPR domain binding	10	1.98731	1	0.503194	0.000255493	0.1	1	2	5	0.890972	1
GO Molecular Function	GO:0050786	RAGE receptor binding	10	1.98731	1	0.503194	0.000255493	0.1	1	1	9	0.890972	1
GO Molecular Function	GO:0035091	phosphatidylinositol binding	132	26.2324	21	0.800535	0.00536536	0.159091	14	40	162	0.897848	1
GO Molecular Function	GO:0016742	hydroxymethyl-, formyl- and related transferase activity	38	7.55176	5	0.662097	0.00127747	0.131579	2	2	8	0.89838	1
GO Molecular Function	GO:0036033	mediator complex binding	18	3.57715	2	0.559104	0.000510986	0.111111	2	3	4	0.898819	1
GO Molecular Function	GO:0043014	alpha-tubulin binding	18	3.57715	2	0.559104	0.000510986	0.111111	2	9	22	0.898819	1
GO Molecular Function	GO:0001540	beta-amyloid binding	25	4.96827	3	0.603832	0.000766479	0.12	1	8	25	0.899307	1
GO Molecular Function	GO:0004645	phosphorylase activity	25	4.96827	3	0.603832	0.000766479	0.12	1	1	6	0.899307	1
GO Molecular Function	GO:0008184	glycogen phosphorylase activity	25	4.96827	3	0.603832	0.000766479	0.12	1	1	3	0.899307	1
GO Molecular Function	GO:0008135	translation factor activity, nucleic acid binding	121	24.0464	19	0.790139	0.00485437	0.157025	8	30	95	0.90042	1
GO Molecular Function	GO:0042277	peptide binding	104	20.668	16	0.774144	0.00408789	0.153846	10	36	155	0.901787	1
GO Molecular Function	GO:0004637	phosphoribosylamine-glycine ligase activity	32	6.35938	4	0.628992	0.00102197	0.125	1	1	1	0.904229	1
GO Molecular Function	GO:0004641	phosphoribosylformylglycinamidine cyclo-ligase activity	32	6.35938	4	0.628992	0.00102197	0.125	1	1	1	0.904229	1
GO Molecular Function	GO:0004644	phosphoribosylglycinamide formyltransferase activity	32	6.35938	4	0.628992	0.00102197	0.125	1	1	1	0.904229	1
GO Molecular Function	GO:0016882	cyclo-ligase activity	32	6.35938	4	0.628992	0.00102197	0.125	1	1	4	0.904229	1
GO Molecular Function	GO:0008307	structural constituent of muscle	45	8.94288	6	0.670925	0.00153296	0.133333	5	15	46	0.906702	1
GO Molecular Function	GO:0033218	amide binding	105	20.8667	16	0.766771	0.00408789	0.152381	10	37	159	0.909486	1
GO Molecular Function	GO:0016773	phosphotransferase activity, alcohol group as acceptor	478	94.9933	84	0.884273	0.0214614	0.175732	62	190	708	0.910376	1
GO Molecular Function	GO:0005251	delayed rectifier potassium channel activity	64	12.7188	9	0.707616	0.00229944	0.140625	4	15	33	0.912103	1
GO Molecular Function	GO:0003899	DNA-directed RNA polymerase activity	11	2.18604	1	0.457449	0.000255493	0.0909091	1	6	43	0.91265	1
GO Molecular Function	GO:0004497	monooxygenase activity	11	2.18604	1	0.457449	0.000255493	0.0909091	1	7	97	0.91265	1
GO Molecular Function	GO:0016624	oxidoreductase activity, acting on the aldehyde or oxo group of donors, disulfide as acceptor	11	2.18604	1	0.457449	0.000255493	0.0909091	1	3	9	0.91265	1
GO Molecular Function	GO:0019966	interleukin-1 binding	11	2.18604	1	0.457449	0.000255493	0.0909091	1	1	3	0.91265	1
GO Molecular Function	GO:0030275	LRR domain binding	11	2.18604	1	0.457449	0.000255493	0.0909091	1	4	16	0.91265	1
GO Molecular Function	GO:0042162	telomeric DNA binding	11	2.18604	1	0.457449	0.000255493	0.0909091	1	3	16	0.91265	1
GO Molecular Function	GO:0051539	4 iron, 4 sulfur cluster binding	11	2.18604	1	0.457449	0.000255493	0.0909091	1	7	37	0.91265	1
GO Molecular Function	GO:0052866	phosphatidylinositol phosphate phosphatase activity	26	5.167	3	0.580608	0.000766479	0.115385	2	9	22	0.913718	1
GO Molecular Function	GO:0030332	cyclin binding	52	10.334	7	0.677376	0.00178845	0.134615	2	7	15	0.914631	1
GO Molecular Function	GO:0032934	sterol binding	52	10.334	7	0.677376	0.00178845	0.134615	2	10	39	0.914631	1
GO Molecular Function	GO:0046966	thyroid hormone receptor binding	52	10.334	7	0.677376	0.00178845	0.134615	3	8	27	0.914631	1
GO Molecular Function	GO:0046872	metal ion binding	3527	700.923	672	0.958736	0.171691	0.19053	292	922	3964	0.915124	1
GO Molecular Function	GO:0008168	methyltransferase activity	263	52.2662	44	0.841845	0.0112417	0.1673	18	54	204	0.915968	1
GO Molecular Function	GO:0051020	GTPase binding	106	21.0654	16	0.759538	0.00408789	0.150943	13	42	171	0.916681	1
GO Molecular Function	GO:0008186	RNA-dependent ATPase activity	33	6.55811	4	0.609932	0.00102197	0.121212	2	9	23	0.916758	1
GO Molecular Function	GO:0019003	GDP binding	46	9.14161	6	0.65634	0.00153296	0.130435	3	12	46	0.917354	1
GO Molecular Function	GO:0031072	heat shock protein binding	71	14.1099	10	0.708723	0.00255493	0.140845	2	11	52	0.920252	1
GO Molecular Function	GO:0016741	transferase activity, transferring one-carbon groups	264	52.4649	44	0.838656	0.0112417	0.166667	18	55	210	0.920443	1
GO Molecular Function	GO:0016757	transferase activity, transferring glycosyl groups	147	29.2134	23	0.78731	0.00587634	0.156463	14	45	271	0.921532	1
GO Molecular Function	GO:0002020	protease binding	27	5.36573	3	0.559104	0.000766479	0.111111	3	14	62	0.926226	1
GO Molecular Function	GO:0016860	intramolecular oxidoreductase activity	27	5.36573	3	0.559104	0.000766479	0.111111	2	8	46	0.926226	1
GO Molecular Function	GO:0008171	O-methyltransferase activity	20	3.97461	2	0.503194	0.000510986	0.1	2	7	16	0.929166	1
GO Molecular Function	GO:0048029	monosaccharide binding	20	3.97461	2	0.503194	0.000510986	0.1	1	13	63	0.929166	1
GO Molecular Function	GO:0070577	histone acetyl-lysine binding	20	3.97461	2	0.503194	0.000510986	0.1	2	5	17	0.929166	1
GO Molecular Function	GO:0004298	threonine-type endopeptidase activity	12	2.38477	1	0.419328	0.000255493	0.0833333	1	4	23	0.930019	1
GO Molecular Function	GO:0030145	manganese ion binding	12	2.38477	1	0.419328	0.000255493	0.0833333	1	5	41	0.930019	1
GO Molecular Function	GO:0048365	Rac GTPase binding	12	2.38477	1	0.419328	0.000255493	0.0833333	1	6	22	0.930019	1
GO Molecular Function	GO:0080025	phosphatidylinositol-3,5-bisphosphate binding	12	2.38477	1	0.419328	0.000255493	0.0833333	1	4	13	0.930019	1
GO Molecular Function	GO:0001099	basal RNA polymerase II transcription machinery binding	41	8.14796	5	0.613651	0.00127747	0.121951	2	7	13	0.931268	1
GO Molecular Function	GO:0047485	protein N-terminus binding	73	14.5073	10	0.689306	0.00255493	0.136986	8	22	91	0.935061	1
GO Molecular Function	GO:0004222	metalloendopeptidase activity	48	9.53907	6	0.628992	0.00153296	0.125	6	24	103	0.93551	1
GO Molecular Function	GO:0019783	small conjugating protein-specific protease activity	48	9.53907	6	0.628992	0.00153296	0.125	5	21	61	0.93551	1
GO Molecular Function	GO:0045296	cadherin binding	28	5.56446	3	0.539136	0.000766479	0.107143	2	5	23	0.937048	1
GO Molecular Function	GO:0070325	lipoprotein particle receptor binding	35	6.95557	4	0.575078	0.00102197	0.114286	2	7	18	0.937501	1
GO Molecular Function	GO:0004003	ATP-dependent DNA helicase activity	55	10.9302	7	0.640428	0.00178845	0.127273	6	8	34	0.939991	1
GO Molecular Function	GO:0005111	type 2 fibroblast growth factor receptor binding	21	4.17334	2	0.479232	0.000510986	0.0952381	1	3	4	0.940892	1
GO Molecular Function	GO:0005548	phospholipid transporter activity	21	4.17334	2	0.479232	0.000510986	0.0952381	2	9	31	0.940892	1
GO Molecular Function	GO:0032813	tumor necrosis factor receptor superfamily binding	21	4.17334	2	0.479232	0.000510986	0.0952381	1	8	36	0.940892	1
GO Molecular Function	GO:0070064	proline-rich region binding	21	4.17334	2	0.479232	0.000510986	0.0952381	2	3	18	0.940892	1
GO Molecular Function	GO:0005158	insulin receptor binding	13	2.5835	1	0.387072	0.000255493	0.0769231	1	5	28	0.943935	1
GO Molecular Function	GO:0008353	RNA polymerase II carboxy-terminal domain kinase activity	13	2.5835	1	0.387072	0.000255493	0.0769231	1	4	16	0.943935	1
GO Molecular Function	GO:0008479	queuine tRNA-ribosyltransferase activity	13	2.5835	1	0.387072	0.000255493	0.0769231	1	2	2	0.943935	1
GO Molecular Function	GO:0015271	outward rectifier potassium channel activity	13	2.5835	1	0.387072	0.000255493	0.0769231	1	6	11	0.943935	1
GO Molecular Function	GO:0042301	phosphate ion binding	13	2.5835	1	0.387072	0.000255493	0.0769231	1	2	11	0.943935	1
GO Molecular Function	GO:0055102	lipase inhibitor activity	13	2.5835	1	0.387072	0.000255493	0.0769231	1	5	16	0.943935	1
GO Molecular Function	GO:0071820	N-box binding	13	2.5835	1	0.387072	0.000255493	0.0769231	1	1	1	0.943935	1
GO Molecular Function	GO:0003727	single-stranded RNA binding	93	18.482	13	0.703389	0.00332141	0.139785	4	15	46	0.945631	1
GO Molecular Function	GO:0017048	Rho GTPase binding	29	5.76319	3	0.520545	0.000766479	0.103448	3	16	55	0.946385	1
GO Molecular Function	GO:0042043	neurexin family protein binding	56	11.1289	7	0.628992	0.00178845	0.125	2	5	13	0.946822	1
GO Molecular Function	GO:0001085	RNA polymerase II transcription factor binding	232	46.1055	37	0.802507	0.00945325	0.159483	12	41	88	0.94717	1
GO Molecular Function	GO:0008236	serine-type peptidase activity	43	8.54542	5	0.585109	0.00127747	0.116279	4	19	172	0.947545	1
GO Molecular Function	GO:0017171	serine hydrolase activity	43	8.54542	5	0.585109	0.00127747	0.116279	4	19	175	0.947545	1
GO Molecular Function	GO:0016705	oxidoreductase activity, acting on paired donors, with incorporation or reduction of molecular oxygen	69	13.7124	9	0.65634	0.00229944	0.130435	6	25	158	0.948734	1
GO Molecular Function	GO:0008757	S-adenosylmethionine-dependent methyltransferase activity	124	24.6426	18	0.730442	0.00459888	0.145161	12	35	107	0.951097	1
GO Molecular Function	GO:0008146	sulfotransferase activity	30	5.96192	3	0.503194	0.000766479	0.1	3	12	53	0.954419	1
GO Molecular Function	GO:0031694	alpha-2A adrenergic receptor binding	30	5.96192	3	0.503194	0.000766479	0.1	2	2	5	0.954419	1
GO Molecular Function	GO:0005243	gap junction channel activity	14	2.78223	1	0.359424	0.000255493	0.0714286	1	4	14	0.955084	1
GO Molecular Function	GO:0008374	O-acyltransferase activity	14	2.78223	1	0.359424	0.000255493	0.0714286	1	8	41	0.955084	1
GO Molecular Function	GO:0034185	apolipoprotein binding	14	2.78223	1	0.359424	0.000255493	0.0714286	1	5	16	0.955084	1
GO Molecular Function	GO:0043995	histone acetyltransferase activity (H4-K5 specific)	14	2.78223	1	0.359424	0.000255493	0.0714286	1	4	9	0.955084	1
GO Molecular Function	GO:0043996	histone acetyltransferase activity (H4-K8 specific)	14	2.78223	1	0.359424	0.000255493	0.0714286	1	4	9	0.955084	1
GO Molecular Function	GO:0046972	histone acetyltransferase activity (H4-K16 specific)	14	2.78223	1	0.359424	0.000255493	0.0714286	1	4	9	0.955084	1
GO Molecular Function	GO:0031267	small GTPase binding	96	19.0781	13	0.681408	0.00332141	0.135417	11	40	159	0.95952	1
GO Molecular Function	GO:0008536	Ran GTPase binding	31	6.16065	3	0.486962	0.000766479	0.0967742	3	10	26	0.961315	1
GO Molecular Function	GO:0042562	hormone binding	52	10.334	6	0.580608	0.00153296	0.115385	3	13	58	0.961538	1
GO Molecular Function	GO:0015631	tubulin binding	139	27.6236	20	0.72402	0.00510986	0.143885	12	58	210	0.962754	1
GO Molecular Function	GO:0004861	cyclin-dependent protein serine/threonine kinase inhibitor activity	15	2.98096	1	0.335462	0.000255493	0.0666667	1	3	12	0.964016	1
GO Molecular Function	GO:0010485	H4 histone acetyltransferase activity	15	2.98096	1	0.335462	0.000255493	0.0666667	1	5	13	0.964016	1
GO Molecular Function	GO:0015026	coreceptor activity	15	2.98096	1	0.335462	0.000255493	0.0666667	1	4	26	0.964016	1
GO Molecular Function	GO:0016667	oxidoreductase activity, acting on a sulfur group of donors	15	2.98096	1	0.335462	0.000255493	0.0666667	1	9	55	0.964016	1
GO Molecular Function	GO:0016722	oxidoreductase activity, oxidizing metal ions	15	2.98096	1	0.335462	0.000255493	0.0666667	1	2	12	0.964016	1
GO Molecular Function	GO:0016723	oxidoreductase activity, oxidizing metal ions, NAD or NADP as acceptor	15	2.98096	1	0.335462	0.000255493	0.0666667	1	2	6	0.964016	1
GO Molecular Function	GO:0004620	phospholipase activity	46	9.14161	5	0.54695	0.00127747	0.108696	4	16	89	0.965476	1
GO Molecular Function	GO:0016298	lipase activity	46	9.14161	5	0.54695	0.00127747	0.108696	4	16	106	0.965476	1
GO Molecular Function	GO:0051082	unfolded protein binding	46	9.14161	5	0.54695	0.00127747	0.108696	3	19	94	0.965476	1
GO Molecular Function	GO:0005070	SH3/SH2 adaptor activity	24	4.76954	2	0.419328	0.000510986	0.0833333	2	11	50	0.96597	1
GO Molecular Function	GO:0008138	protein tyrosine/serine/threonine phosphatase activity	24	4.76954	2	0.419328	0.000510986	0.0833333	1	10	44	0.96597	1
GO Molecular Function	GO:0008143	poly(A) RNA binding	24	4.76954	2	0.419328	0.000510986	0.0833333	2	4	11	0.96597	1
GO Molecular Function	GO:0032453	histone demethylase activity (H3-K4 specific)	24	4.76954	2	0.419328	0.000510986	0.0833333	1	3	5	0.96597	1
GO Molecular Function	GO:0030617	transforming growth factor beta receptor, inhibitory cytoplasmic mediator activity	32	6.35938	3	0.471744	0.000766479	0.09375	2	2	2	0.96722	1
GO Molecular Function	GO:0034713	type I transforming growth factor beta receptor binding	32	6.35938	3	0.471744	0.000766479	0.09375	2	2	7	0.96722	1
GO Molecular Function	GO:0042169	SH2 domain binding	32	6.35938	3	0.471744	0.000766479	0.09375	2	12	32	0.96722	1
GO Molecular Function	GO:0004674	protein serine/threonine kinase activity	324	64.3887	52	0.807595	0.0132856	0.160494	38	120	435	0.967425	1
GO Molecular Function	GO:0003724	RNA helicase activity	47	9.34034	5	0.535312	0.00127747	0.106383	3	14	29	0.970065	1
GO Molecular Function	GO:0016765	transferase activity, transferring alkyl or aryl (other than methyl) groups	16	3.17969	1	0.314496	0.000255493	0.0625	1	7	53	0.971173	1
GO Molecular Function	GO:0017022	myosin binding	16	3.17969	1	0.314496	0.000255493	0.0625	1	8	33	0.971173	1
GO Molecular Function	GO:0034593	phosphatidylinositol bisphosphate phosphatase activity	16	3.17969	1	0.314496	0.000255493	0.0625	1	6	14	0.971173	1
GO Molecular Function	GO:0050733	RS domain binding	16	3.17969	1	0.314496	0.000255493	0.0625	1	4	7	0.971173	1
GO Molecular Function	GO:0070698	type I activin receptor binding	16	3.17969	1	0.314496	0.000255493	0.0625	1	1	2	0.971173	1
GO Molecular Function	GO:0003755	peptidyl-prolyl cis-trans isomerase activity	25	4.96827	2	0.402555	0.000510986	0.08	2	11	42	0.971767	1
GO Molecular Function	GO:0005547	phosphatidylinositol-3,4,5-trisphosphate binding	25	4.96827	2	0.402555	0.000510986	0.08	2	8	22	0.971767	1
GO Molecular Function	GO:0008235	metalloexopeptidase activity	25	4.96827	2	0.402555	0.000510986	0.08	2	11	39	0.971767	1
GO Molecular Function	GO:0033612	receptor serine/threonine kinase binding	25	4.96827	2	0.402555	0.000510986	0.08	2	3	11	0.971767	1
GO Molecular Function	GO:0070696	transmembrane receptor protein serine/threonine kinase binding	25	4.96827	2	0.402555	0.000510986	0.08	2	3	10	0.971767	1
GO Molecular Function	GO:0070717	poly-purine tract binding	25	4.96827	2	0.402555	0.000510986	0.08	2	5	14	0.971767	1
GO Molecular Function	GO:0004221	ubiquitin thiolesterase activity	48	9.53907	5	0.52416	0.00127747	0.104167	4	22	87	0.974084	1
GO Molecular Function	GO:0016763	transferase activity, transferring pentosyl groups	34	6.75684	3	0.443994	0.000766479	0.0882353	3	9	49	0.97657	1
GO Molecular Function	GO:0016859	cis-trans isomerase activity	26	5.167	2	0.387072	0.000510986	0.0769231	2	12	44	0.976605	1
GO Molecular Function	GO:0005102	receptor binding	1096	217.809	193	0.886098	0.0493102	0.176095	102	287	1206	0.97686	1
GO Molecular Function	GO:0001671	ATPase activator activity	17	3.37842	1	0.295996	0.000255493	0.0588235	1	2	8	0.976906	1
GO Molecular Function	GO:0004004	ATP-dependent RNA helicase activity	17	3.37842	1	0.295996	0.000255493	0.0588235	1	8	22	0.976906	1
GO Molecular Function	GO:0008173	RNA methyltransferase activity	17	3.37842	1	0.295996	0.000255493	0.0588235	1	9	31	0.976906	1
GO Molecular Function	GO:0022829	wide pore channel activity	17	3.37842	1	0.295996	0.000255493	0.0588235	1	6	22	0.976906	1
GO Molecular Function	GO:0060590	ATPase regulator activity	17	3.37842	1	0.295996	0.000255493	0.0588235	1	2	12	0.976906	1
GO Molecular Function	GO:0004197	cysteine-type endopeptidase activity	49	9.7378	5	0.513463	0.00127747	0.102041	4	15	69	0.977595	1
GO Molecular Function	GO:0016782	transferase activity, transferring sulfur-containing groups	35	6.95557	3	0.431309	0.000766479	0.0857143	3	16	63	0.980233	1
GO Molecular Function	GO:0031690	adrenergic receptor binding	35	6.95557	3	0.431309	0.000766479	0.0857143	2	6	17	0.980233	1
GO Molecular Function	GO:0016706	oxidoreductase activity, acting on paired donors, with incorporation or reduction of molecular oxygen, 2-oxoglutarate as one donor, and incorporation of one atom each of oxygen into both donors	50	9.93653	5	0.503194	0.00127747	0.1	3	15	45	0.980657	1
GO Molecular Function	GO:0016853	isomerase activity	64	12.7188	7	0.550368	0.00178845	0.109375	5	29	154	0.98084	1
GO Molecular Function	GO:0004180	carboxypeptidase activity	18	3.57715	1	0.279552	0.000255493	0.0555556	1	9	37	0.9815	1
GO Molecular Function	GO:0004181	metallocarboxypeptidase activity	18	3.57715	1	0.279552	0.000255493	0.0555556	1	9	24	0.9815	1
GO Molecular Function	GO:0030544	Hsp70 protein binding	18	3.57715	1	0.279552	0.000255493	0.0555556	1	3	15	0.9815	1
GO Molecular Function	GO:0070697	activin receptor binding	18	3.57715	1	0.279552	0.000255493	0.0555556	1	2	5	0.9815	1
GO Molecular Function	GO:0008234	cysteine-type peptidase activity	85	16.8921	10	0.591992	0.00255493	0.117647	8	33	166	0.983099	1
GO Molecular Function	GO:0005100	Rho GTPase activator activity	36	7.1543	3	0.419328	0.000766479	0.0833333	3	12	38	0.983345	1
GO Molecular Function	GO:0005319	lipid transporter activity	36	7.1543	3	0.419328	0.000766479	0.0833333	3	13	75	0.983345	1
GO Molecular Function	GO:0017025	TBP-class protein binding	36	7.1543	3	0.419328	0.000766479	0.0833333	1	6	17	0.983345	1
GO Molecular Function	GO:0036094	small molecule binding	1942	385.935	351	0.90948	0.0896781	0.180741	195	646	2567	0.983831	1
GO Molecular Function	GO:0043022	ribosome binding	28	5.56446	2	0.359424	0.000510986	0.0714286	2	9	28	0.983988	1
GO Molecular Function	GO:0070628	proteasome binding	19	3.77588	1	0.264839	0.000255493	0.0526316	1	3	8	0.98518	1
GO Molecular Function	GO:0050681	androgen receptor binding	37	7.35303	3	0.407995	0.000766479	0.0810811	3	12	38	0.985984	1
GO Molecular Function	GO:0070851	growth factor receptor binding	87	17.2896	10	0.578383	0.00255493	0.114942	6	19	109	0.986722	1
GO Molecular Function	GO:0035591	signaling adaptor activity	29	5.76319	2	0.34703	0.000510986	0.0689655	2	14	66	0.986773	1
GO Molecular Function	GO:0016301	kinase activity	536	106.52	87	0.816751	0.0222279	0.162313	64	214	829	0.987499	1
GO Molecular Function	GO:0009055	electron carrier activity	20	3.97461	1	0.251597	0.000255493	0.05	1	13	83	0.988128	1
GO Molecular Function	GO:0016538	cyclin-dependent protein serine/threonine kinase regulator activity	20	3.97461	1	0.251597	0.000255493	0.05	1	6	22	0.988128	1
GO Molecular Function	GO:0005160	transforming growth factor beta receptor binding	38	7.55176	3	0.397258	0.000766479	0.0789474	2	6	20	0.988219	1
GO Molecular Function	GO:0032452	histone demethylase activity	38	7.55176	3	0.397258	0.000766479	0.0789474	2	8	16	0.988219	1
GO Molecular Function	GO:0017016	Ras GTPase binding	82	16.2959	9	0.552286	0.00229944	0.109756	8	34	146	0.989241	1
GO Molecular Function	GO:0004712	protein serine/threonine/tyrosine kinase activity	54	10.7315	5	0.46592	0.00127747	0.0925926	4	14	35	0.989395	1
GO Molecular Function	GO:0005126	cytokine receptor binding	115	22.854	14	0.612584	0.0035769	0.121739	7	30	219	0.989438	1
GO Molecular Function	GO:0032451	demethylase activity	39	7.75049	3	0.387072	0.000766479	0.0769231	2	9	24	0.990109	1
GO Molecular Function	GO:0003735	structural constituent of ribosome	76	15.1035	8	0.529678	0.00204395	0.105263	6	22	159	0.990347	1
GO Molecular Function	GO:0003785	actin monomer binding	21	4.17334	1	0.239616	0.000255493	0.0476191	1	3	14	0.99049	1
GO Molecular Function	GO:0005507	copper ion binding	21	4.17334	1	0.239616	0.000255493	0.0476191	1	8	57	0.99049	1
GO Molecular Function	GO:0008641	small protein activating enzyme activity	21	4.17334	1	0.239616	0.000255493	0.0476191	1	3	10	0.99049	1
GO Molecular Function	GO:0019894	kinesin binding	21	4.17334	1	0.239616	0.000255493	0.0476191	1	5	22	0.99049	1
GO Molecular Function	GO:0008237	metallopeptidase activity	83	16.4946	9	0.545632	0.00229944	0.108434	9	42	181	0.990537	1
GO Molecular Function	GO:0005072	transforming growth factor beta receptor, cytoplasmic mediator activity	40	7.94923	3	0.377395	0.000766479	0.075	2	4	10	0.991705	1
GO Molecular Function	GO:0043621	protein self-association	40	7.94923	3	0.377395	0.000766479	0.075	3	11	35	0.991705	1
GO Molecular Function	GO:0008238	exopeptidase activity	48	9.53907	4	0.419328	0.00102197	0.0833333	4	24	106	0.991727	1
GO Molecular Function	GO:0043021	ribonucleoprotein complex binding	63	12.52	6	0.479232	0.00153296	0.0952381	4	17	61	0.991759	1
GO Molecular Function	GO:0005179	hormone activity	56	11.1289	5	0.44928	0.00127747	0.0892857	5	21	114	0.992205	1
GO Molecular Function	GO:0005097	Rab GTPase activator activity	22	4.37207	1	0.228724	0.000255493	0.0454546	1	6	56	0.992382	1
GO Molecular Function	GO:0001664	G-protein coupled receptor binding	138	27.4248	17	0.619876	0.00434338	0.123188	11	47	200	0.993031	1
GO Molecular Function	GO:0003678	DNA helicase activity	72	14.3086	7	0.489216	0.00178845	0.0972222	6	11	46	0.993642	1
GO Molecular Function	GO:0050839	cell adhesion molecule binding	113	22.4566	13	0.578895	0.00332141	0.115044	6	12	54	0.993675	1
GO Molecular Function	GO:0044325	ion channel binding	65	12.9175	6	0.464486	0.00153296	0.0923077	5	25	73	0.99387	1
GO Molecular Function	GO:0005200	structural constituent of cytoskeleton	23	4.57081	1	0.21878	0.000255493	0.0434783	1	10	94	0.993897	1
GO Molecular Function	GO:0050699	WW domain binding	23	4.57081	1	0.21878	0.000255493	0.0434783	1	4	21	0.993897	1
GO Molecular Function	GO:0016790	thiolester hydrolase activity	58	11.5264	5	0.433788	0.00127747	0.0862069	4	25	116	0.994295	1
GO Molecular Function	GO:0017124	SH3 domain binding	87	17.2896	9	0.520545	0.00229944	0.103448	7	30	115	0.994396	1
GO Molecular Function	GO:0016788	hydrolase activity, acting on ester bonds	403	80.0884	61	0.761658	0.0155851	0.151365	34	148	758	0.994485	1
GO Molecular Function	GO:0004175	endopeptidase activity	147	29.2134	18	0.616155	0.00459888	0.122449	16	62	374	0.994734	1
GO Molecular Function	GO:0016830	carbon-carbon lyase activity	24	4.76954	1	0.209664	0.000255493	0.0416667	1	12	49	0.995111	1
GO Molecular Function	GO:0051087	chaperone binding	24	4.76954	1	0.209664	0.000255493	0.0416667	1	7	45	0.995111	1
GO Molecular Function	GO:0070411	I-SMAD binding	52	10.334	4	0.387072	0.00102197	0.0769231	3	7	11	0.995745	1
GO Molecular Function	GO:0008094	DNA-dependent ATPase activity	77	15.3023	7	0.457449	0.00178845	0.0909091	6	15	72	0.996918	1
GO Molecular Function	GO:0004722	protein serine/threonine phosphatase activity	37	7.35303	2	0.271997	0.000510986	0.054054	2	16	51	0.997216	1
GO Molecular Function	GO:0051213	dioxygenase activity	85	16.8921	8	0.473594	0.00204395	0.0941176	6	28	82	0.997217	1
GO Molecular Function	GO:0016407	acetyltransferase activity	100	19.8731	10	0.503194	0.00255493	0.1	8	30	95	0.997493	1
GO Molecular Function	GO:0005104	fibroblast growth factor receptor binding	47	9.34034	3	0.321187	0.000766479	0.0638298	2	6	22	0.997643	1
GO Molecular Function	GO:0016772	transferase activity, transferring phosphorus-containing groups	582	115.661	90	0.778134	0.0229944	0.154639	67	238	971	0.997695	1
GO Molecular Function	GO:0031755	Edg-2 lysophosphatidic acid receptor binding	28	5.56446	1	0.179712	0.000255493	0.0357143	1	1	2	0.997987	1
GO Molecular Function	GO:0047696	beta-adrenergic receptor kinase activity	28	5.56446	1	0.179712	0.000255493	0.0357143	1	1	2	0.997987	1
GO Molecular Function	GO:0008080	N-acetyltransferase activity	95	18.8794	9	0.47671	0.00229944	0.0947368	7	27	81	0.998122	1
GO Molecular Function	GO:0005105	type 1 fibroblast growth factor receptor binding	39	7.75049	2	0.258048	0.000510986	0.0512821	1	3	5	0.998127	1
GO Molecular Function	GO:0032561	guanyl ribonucleotide binding	252	50.0801	33	0.658944	0.00843127	0.130952	19	86	388	0.998263	1
GO Molecular Function	GO:0008026	ATP-dependent helicase activity	131	26.0337	14	0.537764	0.0035769	0.10687	11	34	111	0.998386	1
GO Molecular Function	GO:0008060	ARF GTPase activator activity	29	5.76319	1	0.173515	0.000255493	0.0344828	1	7	30	0.998388	1
GO Molecular Function	GO:0051015	actin filament binding	29	5.76319	1	0.173515	0.000255493	0.0344828	1	12	76	0.998388	1
GO Molecular Function	GO:0052689	carboxylic ester hydrolase activity	40	7.94923	2	0.251597	0.000510986	0.05	2	13	90	0.998465	1
GO Molecular Function	GO:0016410	N-acyltransferase activity	97	19.2769	9	0.466881	0.00229944	0.0927835	7	29	96	0.998583	1
GO Molecular Function	GO:0004703	G-protein coupled receptor kinase activity	30	5.96192	1	0.167731	0.000255493	0.0333333	1	3	7	0.998709	1
GO Molecular Function	GO:0030291	protein serine/threonine kinase inhibitor activity	30	5.96192	1	0.167731	0.000255493	0.0333333	1	8	26	0.998709	1
GO Molecular Function	GO:0005198	structural molecule activity	280	55.6446	37	0.664934	0.00945325	0.132143	29	110	635	0.998732	1
GO Molecular Function	GO:0031593	polyubiquitin binding	41	8.14796	2	0.24546	0.000510986	0.0487805	2	11	31	0.998743	1
GO Molecular Function	GO:0042393	histone binding	120	23.8477	12	0.503194	0.00306592	0.1	7	35	117	0.998868	1
GO Molecular Function	GO:0030695	GTPase regulator activity	221	43.9195	27	0.614761	0.00689831	0.122172	24	93	456	0.999079	1
GO Molecular Function	GO:0004553	hydrolase activity, hydrolyzing O-glycosyl compounds	43	8.54542	2	0.234044	0.000510986	0.0465116	2	14	99	0.999158	1
GO Molecular Function	GO:0016779	nucleotidyltransferase activity	44	8.74415	2	0.228724	0.000510986	0.0454546	2	22	122	0.999311	1
GO Molecular Function	GO:0003746	translation elongation factor activity	33	6.55811	1	0.152483	0.000255493	0.030303	1	7	24	0.999337	1
GO Molecular Function	GO:0032403	protein complex binding	462	91.8136	66	0.718848	0.0168625	0.142857	43	142	575	0.999356	1
GO Molecular Function	GO:0070491	repressing transcription factor binding	146	29.0147	15	0.51698	0.0038324	0.10274	7	23	53	0.999419	1
GO Molecular Function	GO:0015459	potassium channel regulator activity	45	8.94288	2	0.223642	0.000510986	0.0444444	2	15	36	0.999437	1
GO Molecular Function	GO:0004386	helicase activity	161	31.9956	17	0.531323	0.00434338	0.10559	13	45	150	0.999506	1
GO Molecular Function	GO:0003697	single-stranded DNA binding	56	11.1289	3	0.269568	0.000766479	0.0535714	3	13	65	0.999558	1
GO Molecular Function	GO:0005543	phospholipid binding	359	71.3443	48	0.672794	0.0122637	0.133705	37	113	506	0.999558	1
GO Molecular Function	GO:0070011	peptidase activity, acting on L-amino acid peptides	223	44.3169	26	0.586683	0.00664282	0.116592	23	101	576	0.999622	1
GO Molecular Function	GO:0005099	Ras GTPase activator activity	75	14.9048	5	0.335462	0.00127747	0.0666667	5	25	116	0.999653	1
GO Molecular Function	GO:0060589	nucleoside-triphosphatase regulator activity	238	47.2979	28	0.591992	0.00715381	0.117647	25	95	468	0.999697	1
GO Molecular Function	GO:0005096	GTPase activator activity	131	26.0337	12	0.460941	0.00306592	0.0916031	11	51	255	0.999745	1
GO Molecular Function	GO:0008233	peptidase activity	228	45.3106	26	0.573817	0.00664282	0.114035	23	104	606	0.999782	1
GO Molecular Function	GO:0016798	hydrolase activity, acting on glycosyl bonds	78	15.501	5	0.32256	0.00127747	0.0641026	3	22	126	0.999793	1
GO Molecular Function	GO:0008270	zinc ion binding	1341	266.498	218	0.818018	0.0556975	0.162565	96	330	1191	0.999806	1
GO Molecular Function	GO:0005525	GTP binding	245	48.689	28	0.575078	0.00715381	0.114286	17	83	371	0.999858	1
GO Molecular Function	GO:0046914	transition metal ion binding	1390	276.236	225	0.814522	0.057486	0.161871	102	359	1424	0.999886	1
GO Molecular Function	GO:0035064	methylated histone residue binding	53	10.5327	2	0.189884	0.000510986	0.0377359	2	16	45	0.999889	1
GO Molecular Function	GO:0043168	anion binding	1776	352.946	295	0.835823	0.0753705	0.166104	188	625	2725	0.999897	1
GO Molecular Function	GO:0030554	adenyl nucleotide binding	1007	200.122	156	0.779525	0.0398569	0.154916	115	376	1517	0.999899	1
GO Molecular Function	GO:0000166	nucleotide binding	1755	348.772	291	0.834355	0.0743485	0.165812	179	592	2315	0.999901	1
GO Molecular Function	GO:1901265	nucleoside phosphate binding	1755	348.772	291	0.834355	0.0743485	0.165812	179	592	2316	0.999901	1
GO Molecular Function	GO:0032559	adenyl ribonucleotide binding	992	197.141	153	0.776095	0.0390904	0.154234	112	369	1502	0.999911	1
GO Molecular Function	GO:0008047	enzyme activator activity	236	46.9004	26	0.554366	0.00664282	0.110169	20	93	417	0.999912	1
GO Molecular Function	GO:0005083	small GTPase regulator activity	161	31.9956	15	0.468814	0.0038324	0.0931677	14	62	311	0.999919	1
GO Molecular Function	GO:0003924	GTPase activity	162	32.1944	15	0.46592	0.0038324	0.0925926	10	57	231	0.999929	1
GO Molecular Function	GO:0001103	RNA polymerase II repressing transcription factor binding	93	18.482	6	0.324641	0.00153296	0.0645161	3	13	27	0.999932	1
GO Molecular Function	GO:0043167	ion binding	4714	936.816	846	0.903059	0.216147	0.179465	426	1401	6034	0.999942	1
GO Molecular Function	GO:0005524	ATP binding	982	195.154	150	0.768626	0.038324	0.152749	109	362	1470	0.999942	1
GO Molecular Function	GO:0042623	ATPase activity, coupled	227	45.1119	24	0.532011	0.00613183	0.105727	16	66	286	0.999947	1
GO Molecular Function	GO:0004402	histone acetyltransferase activity	78	15.501	4	0.258048	0.00102197	0.0512821	3	20	56	0.999958	1
GO Molecular Function	GO:0043130	ubiquitin binding	58	11.5264	2	0.173515	0.000510986	0.0344828	2	20	64	0.99996	1
GO Molecular Function	GO:0003723	RNA binding	1050	208.667	160	0.766771	0.0408789	0.152381	81	279	907	0.999971	1
GO Molecular Function	GO:0032182	small conjugating protein binding	60	11.9238	2	0.167731	0.000510986	0.0333333	2	21	75	0.999974	1
GO Molecular Function	GO:0016747	transferase activity, transferring acyl groups other than amino-acyl groups	133	26.4312	10	0.378341	0.00255493	0.075188	8	53	194	0.99998	1
GO Molecular Function	GO:0016746	transferase activity, transferring acyl groups	140	27.8223	10	0.359424	0.00255493	0.0714286	8	58	233	0.999993	1
GO Molecular Function	GO:0016887	ATPase activity	269	53.4585	25	0.467652	0.00638733	0.0929368	17	82	357	0.999999	1
GO Molecular Function	GO:0017111	nucleoside-triphosphatase activity	538	106.917	65	0.607948	0.0166071	0.120818	41	182	761	1	1
GO Molecular Function	GO:0017076	purine nucleotide binding	1223	243.048	179	0.736481	0.0457333	0.146361	129	452	1862	1	1
GO Molecular Function	GO:0016462	pyrophosphatase activity	540	107.314	65	0.605696	0.0166071	0.12037	41	184	799	1	1
GO Molecular Function	GO:0016818	hydrolase activity, acting on acid anhydrides, in phosphorus-containing anhydrides	540	107.314	65	0.605696	0.0166071	0.12037	41	184	802	1	1
GO Molecular Function	GO:0032553	ribonucleotide binding	1208	240.067	176	0.73313	0.0449668	0.145695	126	445	1859	1	1
GO Molecular Function	GO:0032555	purine ribonucleotide binding	1208	240.067	176	0.73313	0.0449668	0.145695	126	445	1845	1	1
GO Molecular Function	GO:0016817	hydrolase activity, acting on acid anhydrides	541	107.513	65	0.604576	0.0166071	0.120148	41	185	807	1	1
GO Molecular Function	GO:0097367	carbohydrate derivative binding	1364	271.069	203	0.748888	0.0518651	0.148827	143	502	2139	1	1
GO Molecular Function	GO:0032549	ribonucleoside binding	1203	239.073	174	0.727811	0.0444558	0.144638	124	441	1820	1	1
GO Molecular Function	GO:0032550	purine ribonucleoside binding	1203	239.073	174	0.727811	0.0444558	0.144638	124	441	1816	1	1
GO Molecular Function	GO:0035639	purine ribonucleoside triphosphate binding	1198	238.079	173	0.726649	0.0442003	0.144407	123	438	1807	1	1
GO Molecular Function	GO:0001883	purine nucleoside binding	1205	239.47	174	0.726603	0.0444558	0.144398	124	443	1819	1	1
GO Molecular Function	GO:0001882	nucleoside binding	1207	239.868	174	0.725399	0.0444558	0.144159	124	445	1830	1	1
GO Molecular Function	GO:0016740	transferase activity	1185	235.496	169	0.717635	0.0431783	0.142616	114	430	1848	1	1
GO Molecular Function	GO:0016787	hydrolase activity	1267	251.792	169	0.67119	0.0431783	0.133386	104	469	2403	1	1
GO Molecular Function	GO:0000009	alpha-1,6-mannosyltransferase activity	0	0	0	0	0	0	0	0	2	1	1
GO Molecular Function	GO:0000010	trans-hexaprenyltranstransferase activity	0	0	0	0	0	0	0	0	2	1	1
GO Molecular Function	GO:0000014	single-stranded DNA endodeoxyribonuclease activity	0	0	0	0	0	0	0	0	6	1	1
GO Molecular Function	GO:0000016	lactase activity	0	0	0	0	0	0	0	0	1	1	1
GO Molecular Function	GO:0000026	alpha-1,2-mannosyltransferase activity	0	0	0	0	0	0	0	0	3	1	1
GO Molecular Function	GO:0000033	alpha-1,3-mannosyltransferase activity	3	0.596192	0	0	0	0	0	1	3	1	1
GO Molecular Function	GO:0000036	ACP phosphopantetheine attachment site binding involved in fatty acid biosynthetic process	2	0.397461	0	0	0	0	0	1	1	1	1
GO Molecular Function	GO:0000049	tRNA binding	5	0.993653	0	0	0	0	0	3	36	1	1
GO Molecular Function	GO:0000062	fatty-acyl-CoA binding	7	1.39111	0	0	0	0	0	3	20	1	1
GO Molecular Function	GO:0000064	L-ornithine transmembrane transporter activity	4	0.794923	0	0	0	0	0	1	3	1	1
GO Molecular Function	GO:0000095	S-adenosyl-L-methionine transmembrane transporter activity	0	0	0	0	0	0	0	0	1	1	1
GO Molecular Function	GO:0000099	sulfur amino acid transmembrane transporter activity	0	0	0	0	0	0	0	0	6	1	1
GO Molecular Function	GO:0000104	succinate dehydrogenase activity	3	0.596192	0	0	0	0	0	1	4	1	1
GO Molecular Function	GO:0000146	microfilament motor activity	3	0.596192	0	0	0	0	0	2	22	1	1
GO Molecular Function	GO:0000150	recombinase activity	0	0	0	0	0	0	0	0	1	1	1
GO Molecular Function	GO:0000156	phosphorelay response regulator activity	0	0	0	0	0	0	0	0	2	1	1
GO Molecular Function	GO:0000171	ribonuclease MRP activity	0	0	0	0	0	0	0	0	1	1	1
GO Molecular Function	GO:0000179	rRNA (adenine-N6,N6-)-dimethyltransferase activity	0	0	0	0	0	0	0	0	4	1	1
GO Molecular Function	GO:0000182	rDNA binding	9	1.78858	0	0	0	0	0	3	5	1	1
GO Molecular Function	GO:0000210	NAD+ diphosphatase activity	0	0	0	0	0	0	0	0	1	1	1
GO Molecular Function	GO:0000213	tRNA-intron endonuclease activity	0	0	0	0	0	0	0	0	3	1	1
GO Molecular Function	GO:0000215	tRNA 2'-phosphotransferase activity	0	0	0	0	0	0	0	0	1	1	1
GO Molecular Function	GO:0000224	peptide-N4-(N-acetyl-beta-glucosaminyl)asparagine amidase activity	0	0	0	0	0	0	0	0	1	1	1
GO Molecular Function	GO:0000225	N-acetylglucosaminylphosphatidylinositol deacetylase activity	0	0	0	0	0	0	0	0	1	1	1
GO Molecular Function	GO:0000247	C-8 sterol isomerase activity	3	0.596192	0	0	0	0	0	1	2	1	1
GO Molecular Function	GO:0000248	C-5 sterol desaturase activity	0	0	0	0	0	0	0	0	2	1	1
GO Molecular Function	GO:0000250	lanosterol synthase activity	0	0	0	0	0	0	0	0	1	1	1
GO Molecular Function	GO:0000254	C-4 methylsterol oxidase activity	0	0	0	0	0	0	0	0	1	1	1
GO Molecular Function	GO:0000257	nitrilase activity	0	0	0	0	0	0	0	0	1	1	1
GO Molecular Function	GO:0000285	1-phosphatidylinositol-3-phosphate 5-kinase activity	4	0.794923	0	0	0	0	0	1	1	1	1
GO Molecular Function	GO:0000293	ferric-chelate reductase activity	10	1.98731	0	0	0	0	0	1	4	1	1
GO Molecular Function	GO:0000295	adenine nucleotide transmembrane transporter activity	0	0	0	0	0	0	0	0	4	1	1
GO Molecular Function	GO:0000309	nicotinamide-nucleotide adenylyltransferase activity	0	0	0	0	0	0	0	0	3	1	1
GO Molecular Function	GO:0000334	3-hydroxyanthranilate 3,4-dioxygenase activity	0	0	0	0	0	0	0	0	1	1	1
GO Molecular Function	GO:0000339	RNA cap binding	5	0.993653	0	0	0	0	0	2	10	1	1
GO Molecular Function	GO:0000340	RNA 7-methylguanosine cap binding	0	0	0	0	0	0	0	0	3	1	1
GO Molecular Function	GO:0000386	second spliceosomal transesterification activity	0	0	0	0	0	0	0	0	1	1	1
GO Molecular Function	GO:0000400	four-way junction DNA binding	1	0.198731	0	0	0	0	0	1	4	1	1
GO Molecular Function	GO:0000404	loop DNA binding	0	0	0	0	0	0	0	0	3	1	1
GO Molecular Function	GO:0000406	double-strand/single-strand DNA junction binding	0	0	0	0	0	0	0	0	2	1	1
GO Molecular Function	GO:0000700	mismatch base pair DNA N-glycosylase activity	0	0	0	0	0	0	0	0	3	1	1
GO Molecular Function	GO:0000701	purine-specific mismatch base pair DNA N-glycosylase activity	0	0	0	0	0	0	0	0	1	1	1
GO Molecular Function	GO:0000773	phosphatidyl-N-methylethanolamine N-methyltransferase activity	0	0	0	0	0	0	0	0	1	1	1
GO Molecular Function	GO:0000774	adenyl-nucleotide exchange factor activity	0	0	0	0	0	0	0	0	2	1	1
GO Molecular Function	GO:0000822	inositol hexakisphosphate binding	1	0.198731	0	0	0	0	0	1	1	1	1
GO Molecular Function	GO:0000823	inositol-1,4,5-trisphosphate 6-kinase activity	0	0	0	0	0	0	0	0	1	1	1
GO Molecular Function	GO:0000824	inositol tetrakisphosphate 3-kinase activity	0	0	0	0	0	0	0	0	1	1	1
GO Molecular Function	GO:0000827	inositol-1,3,4,5,6-pentakisphosphate kinase activity	2	0.397461	0	0	0	0	0	2	2	1	1
GO Molecular Function	GO:0000831	inositol hexakisphosphate 6-kinase activity	0	0	0	0	0	0	0	0	1	1	1
GO Molecular Function	GO:0000832	inositol hexakisphosphate 5-kinase activity	3	0.596192	0	0	0	0	0	3	5	1	1
GO Molecular Function	GO:0001010	sequence-specific DNA binding transcription factor recruiting transcription factor activity	0	0	0	0	0	0	0	0	2	1	1
GO Molecular Function	GO:0001011	sequence-specific DNA binding RNA polymerase recruiting transcription factor activity	11	2.18604	0	0	0	0	0	1	1	1	1
GO Molecular Function	GO:0001030	RNA polymerase III type 1 promoter DNA binding	1	0.198731	0	0	0	0	0	1	3	1	1
GO Molecular Function	GO:0001031	RNA polymerase III type 2 promoter DNA binding	1	0.198731	0	0	0	0	0	1	3	1	1
GO Molecular Function	GO:0001032	RNA polymerase III type 3 promoter DNA binding	1	0.198731	0	0	0	0	0	1	3	1	1
GO Molecular Function	GO:0001042	RNA polymerase I core binding	1	0.198731	0	0	0	0	0	1	1	1	1
GO Molecular Function	GO:0001075	RNA polymerase II core promoter sequence-specific DNA binding transcription factor activity involved in preinitiation complex assembly	0	0	0	0	0	0	0	0	1	1	1
GO Molecular Function	GO:0001087	TFIIB-class binding transcription factor activity	11	2.18604	0	0	0	0	0	1	1	1	1
GO Molecular Function	GO:0001091	RNA polymerase II basal transcription factor binding	11	2.18604	0	0	0	0	0	1	3	1	1
GO Molecular Function	GO:0001093	TFIIB-class transcription factor binding	11	2.18604	0	0	0	0	0	1	1	1	1
GO Molecular Function	GO:0001094	TFIID-class transcription factor binding	0	0	0	0	0	0	0	0	2	1	1
GO Molecular Function	GO:0001133	sequence-specific transcription regulatory region DNA binding RNA polymerase II transcription factor recruiting transcription factor activity	0	0	0	0	0	0	0	0	1	1	1
GO Molecular Function	GO:0001134	transcription factor recruiting transcription factor activity	0	0	0	0	0	0	0	0	4	1	1
GO Molecular Function	GO:0001135	RNA polymerase II transcription factor recruiting transcription factor activity	0	0	0	0	0	0	0	0	1	1	1
GO Molecular Function	GO:0001156	TFIIIC-class transcription factor binding	1	0.198731	0	0	0	0	0	1	2	1	1
GO Molecular Function	GO:0001162	RNA polymerase II intronic transcription regulatory region sequence-specific DNA binding	1	0.198731	0	0	0	0	0	1	2	1	1
GO Molecular Function	GO:0001164	RNA polymerase I CORE element sequence-specific DNA binding	0	0	0	0	0	0	0	0	1	1	1
GO Molecular Function	GO:0001187	RNA polymerase I CORE element sequence-specific DNA binding transcription factor recruiting transcription factor activity	0	0	0	0	0	0	0	0	1	1	1
GO Molecular Function	GO:0001205	RNA polymerase II distal enhancer sequence-specific DNA binding transcription factor activity involved in positive regulation of transcription	2	0.397461	0	0	0	0	0	2	4	1	1
GO Molecular Function	GO:0001226	RNA polymerase II transcription corepressor binding	4	0.794923	0	0	0	0	0	1	1	1	1
GO Molecular Function	GO:0001512	dihydronicotinamide riboside quinone reductase activity	0	0	0	0	0	0	0	0	1	1	1
GO Molecular Function	GO:0001515	opioid peptide activity	1	0.198731	0	0	0	0	0	1	5	1	1
GO Molecular Function	GO:0001517	N-acetylglucosamine 6-O-sulfotransferase activity	1	0.198731	0	0	0	0	0	1	5	1	1
GO Molecular Function	GO:0001532	interleukin-21 receptor activity	0	0	0	0	0	0	0	0	1	1	1
GO Molecular Function	GO:0001537	N-acetylgalactosamine 4-O-sulfotransferase activity	4	0.794923	0	0	0	0	0	2	5	1	1
GO Molecular Function	GO:0001567	cholesterol 25-hydroxylase activity	0	0	0	0	0	0	0	0	1	1	1
GO Molecular Function	GO:0001587	Gq/11-coupled serotonin receptor activity	0	0	0	0	0	0	0	0	1	1	1
GO Molecular Function	GO:0001588	dopamine neurotransmitter receptor activity, coupled via Gs	0	0	0	0	0	0	0	0	2	1	1
GO Molecular Function	GO:0001591	dopamine neurotransmitter receptor activity, coupled via Gi/Go	2	0.397461	0	0	0	0	0	2	3	1	1
GO Molecular Function	GO:0001594	trace-amine receptor activity	0	0	0	0	0	0	0	0	5	1	1
GO Molecular Function	GO:0001596	angiotensin type I receptor activity	0	0	0	0	0	0	0	0	1	1	1
GO Molecular Function	GO:0001601	peptide YY receptor activity	0	0	0	0	0	0	0	0	4	1	1
GO Molecular Function	GO:0001602	pancreatic polypeptide receptor activity	0	0	0	0	0	0	0	0	3	1	1
GO Molecular Function	GO:0001604	urotensin II receptor activity	0	0	0	0	0	0	0	0	1	1	1
GO Molecular Function	GO:0001605	adrenomedullin receptor activity	0	0	0	0	0	0	0	0	1	1	1
GO Molecular Function	GO:0001607	neuromedin U receptor activity	0	0	0	0	0	0	0	0	2	1	1
GO Molecular Function	GO:0001609	G-protein coupled adenosine receptor activity	6	1.19238	0	0	0	0	0	3	8	1	1
GO Molecular Function	GO:0001614	purinergic nucleotide receptor activity	5	0.993653	0	0	0	0	0	3	19	1	1
GO Molecular Function	GO:0001616	growth hormone secretagogue receptor activity	0	0	0	0	0	0	0	0	1	1	1
GO Molecular Function	GO:0001621	ADP receptor activity	4	0.794923	0	0	0	0	0	1	1	1	1
GO Molecular Function	GO:0001626	nociceptin receptor activity	0	0	0	0	0	0	0	0	1	1	1
GO Molecular Function	GO:0001631	cysteinyl leukotriene receptor activity	0	0	0	0	0	0	0	0	1	1	1
GO Molecular Function	GO:0001632	leukotriene B4 receptor activity	0	0	0	0	0	0	0	0	2	1	1
GO Molecular Function	GO:0001635	calcitonin gene-related polypeptide receptor activity	0	0	0	0	0	0	0	0	2	1	1
GO Molecular Function	GO:0001641	group II metabotropic glutamate receptor activity	1	0.198731	0	0	0	0	0	1	2	1	1
GO Molecular Function	GO:0001665	alpha-N-acetylgalactosaminide alpha-2,6-sialyltransferase activity	0	0	0	0	0	0	0	0	3	1	1
GO Molecular Function	GO:0001681	sialate O-acetylesterase activity	0	0	0	0	0	0	0	0	1	1	1
GO Molecular Function	GO:0001716	L-amino-acid oxidase activity	0	0	0	0	0	0	0	0	1	1	1
GO Molecular Function	GO:0001729	ceramide kinase activity	0	0	0	0	0	0	0	0	2	1	1
GO Molecular Function	GO:0001730	2'-5'-oligoadenylate synthetase activity	0	0	0	0	0	0	0	0	3	1	1
GO Molecular Function	GO:0001735	prenylcysteine oxidase activity	3	0.596192	0	0	0	0	0	1	2	1	1
GO Molecular Function	GO:0001758	retinal dehydrogenase activity	1	0.198731	0	0	0	0	0	1	6	1	1
GO Molecular Function	GO:0001760	aminocarboxymuconate-semialdehyde decarboxylase activity	0	0	0	0	0	0	0	0	1	1	1
GO Molecular Function	GO:0001785	prostaglandin J receptor activity	0	0	0	0	0	0	0	0	2	1	1
GO Molecular Function	GO:0001786	phosphatidylserine binding	6	1.19238	0	0	0	0	0	3	15	1	1
GO Molecular Function	GO:0001846	opsonin binding	2	0.397461	0	0	0	0	0	1	7	1	1
GO Molecular Function	GO:0001847	opsonin receptor activity	0	0	0	0	0	0	0	0	3	1	1
GO Molecular Function	GO:0001848	complement binding	3	0.596192	0	0	0	0	0	2	9	1	1
GO Molecular Function	GO:0001849	complement component C1q binding	2	0.397461	0	0	0	0	0	1	3	1	1
GO Molecular Function	GO:0001851	complement component C3b binding	0	0	0	0	0	0	0	0	1	1	1
GO Molecular Function	GO:0001855	complement component C4b binding	0	0	0	0	0	0	0	0	1	1	1
GO Molecular Function	GO:0001856	complement component C5a binding	0	0	0	0	0	0	0	0	1	1	1
GO Molecular Function	GO:0001861	complement component C4b receptor activity	0	0	0	0	0	0	0	0	1	1	1
GO Molecular Function	GO:0001872	(1->3)-beta-D-glucan binding	0	0	0	0	0	0	0	0	2	1	1
GO Molecular Function	GO:0001874	(1->3)-beta-D-glucan receptor activity	0	0	0	0	0	0	0	0	1	1	1
GO Molecular Function	GO:0001875	lipopolysaccharide receptor activity	0	0	0	0	0	0	0	0	5	1	1
GO Molecular Function	GO:0001888	glucuronyl-galactosyl-proteoglycan 4-alpha-N-acetylglucosaminyltransferase activity	0	0	0	0	0	0	0	0	2	1	1
GO Molecular Function	GO:0001918	farnesylated protein binding	0	0	0	0	0	0	0	0	1	1	1
GO Molecular Function	GO:0001965	G-protein alpha-subunit binding	2	0.397461	0	0	0	0	0	1	11	1	1
GO Molecular Function	GO:0002046	opsin binding	4	0.794923	0	0	0	0	0	1	2	1	1
GO Molecular Function	GO:0002054	nucleobase binding	0	0	0	0	0	0	0	0	4	1	1
GO Molecular Function	GO:0002055	adenine binding	0	0	0	0	0	0	0	0	1	1	1
GO Molecular Function	GO:0002058	uracil binding	0	0	0	0	0	0	0	0	1	1	1
GO Molecular Function	GO:0002059	thymine binding	0	0	0	0	0	0	0	0	1	1	1
GO Molecular Function	GO:0002060	purine nucleobase binding	0	0	0	0	0	0	0	0	3	1	1
GO Molecular Function	GO:0002083	4-hydroxybenzoate decaprenyltransferase activity	0	0	0	0	0	0	0	0	1	1	1
GO Molecular Function	GO:0002113	interleukin-33 binding	0	0	0	0	0	0	0	0	1	1	1
GO Molecular Function	GO:0002114	interleukin-33 receptor activity	0	0	0	0	0	0	0	0	1	1	1
GO Molecular Function	GO:0002134	UTP binding	8	1.58984	0	0	0	0	0	1	3	1	1
GO Molecular Function	GO:0002135	CTP binding	8	1.58984	0	0	0	0	0	1	2	1	1
GO Molecular Function	GO:0002151	G-quadruplex RNA binding	6	1.19238	0	0	0	0	0	2	2	1	1
GO Molecular Function	GO:0002153	steroid receptor RNA activator RNA binding	18	3.57715	0	0	0	0	0	1	1	1	1
GO Molecular Function	GO:0002162	dystroglycan binding	2	0.397461	0	0	0	0	0	1	6	1	1
GO Molecular Function	GO:0003688	DNA replication origin binding	2	0.397461	0	0	0	0	0	1	6	1	1
GO Molecular Function	GO:0003689	DNA clamp loader activity	0	0	0	0	0	0	0	0	2	1	1
GO Molecular Function	GO:0003691	double-stranded telomeric DNA binding	1	0.198731	0	0	0	0	0	1	5	1	1
GO Molecular Function	GO:0003692	left-handed Z-DNA binding	0	0	0	0	0	0	0	0	1	1	1
GO Molecular Function	GO:0003696	satellite DNA binding	2	0.397461	0	0	0	0	0	2	7	1	1
GO Molecular Function	GO:0003720	telomerase activity	0	0	0	0	0	0	0	0	4	1	1
GO Molecular Function	GO:0003721	telomeric template RNA reverse transcriptase activity	0	0	0	0	0	0	0	0	1	1	1
GO Molecular Function	GO:0003726	double-stranded RNA adenosine deaminase activity	1	0.198731	0	0	0	0	0	1	3	1	1
GO Molecular Function	GO:0003747	translation release factor activity	3	0.596192	0	0	0	0	0	1	6	1	1
GO Molecular Function	GO:0003756	protein disulfide isomerase activity	14	2.78223	0	0	0	0	0	2	16	1	1
GO Molecular Function	GO:0003796	lysozyme activity	1	0.198731	0	0	0	0	0	1	11	1	1
GO Molecular Function	GO:0003810	protein-glutamine gamma-glutamyltransferase activity	0	0	0	0	0	0	0	0	9	1	1
GO Molecular Function	GO:0003823	antigen binding	11	2.18604	0	0	0	0	0	4	56	1	1
GO Molecular Function	GO:0003824	catalytic activity	3146	625.207	488	0.780542	0.124681	0.155118	283	1142	5494	1	1
GO Molecular Function	GO:0003826	alpha-ketoacid dehydrogenase activity	0	0	0	0	0	0	0	0	2	1	1
GO Molecular Function	GO:0003827	alpha-1,3-mannosylglycoprotein 2-beta-N-acetylglucosaminyltransferase activity	0	0	0	0	0	0	0	0	1	1	1
GO Molecular Function	GO:0003829	beta-1,3-galactosyl-O-glycosyl-glycoprotein beta-1,6-N-acetylglucosaminyltransferase activity	0	0	0	0	0	0	0	0	3	1	1
GO Molecular Function	GO:0003830	beta-1,4-mannosylglycoprotein 4-beta-N-acetylglucosaminyltransferase activity	1	0.198731	0	0	0	0	0	1	1	1	1
GO Molecular Function	GO:0003834	beta-carotene 15,15'-monooxygenase activity	0	0	0	0	0	0	0	0	1	1	1
GO Molecular Function	GO:0003835	beta-galactoside alpha-2,6-sialyltransferase activity	0	0	0	0	0	0	0	0	2	1	1
GO Molecular Function	GO:0003836	beta-galactoside (CMP) alpha-2,3-sialyltransferase activity	1	0.198731	0	0	0	0	0	1	4	1	1
GO Molecular Function	GO:0003837	beta-ureidopropionase activity	0	0	0	0	0	0	0	0	1	1	1
GO Molecular Function	GO:0003839	gamma-glutamylcyclotransferase activity	0	0	0	0	0	0	0	0	2	1	1
GO Molecular Function	GO:0003840	gamma-glutamyltransferase activity	2	0.397461	0	0	0	0	0	1	8	1	1
GO Molecular Function	GO:0003842	1-pyrroline-5-carboxylate dehydrogenase activity	1	0.198731	0	0	0	0	0	1	1	1	1
GO Molecular Function	GO:0003844	1,4-alpha-glucan branching enzyme activity	1	0.198731	0	0	0	0	0	1	1	1	1
GO Molecular Function	GO:0003845	11-beta-hydroxysteroid dehydrogenase [NAD(P)] activity	0	0	0	0	0	0	0	0	2	1	1
GO Molecular Function	GO:0003846	2-acylglycerol O-acyltransferase activity	0	0	0	0	0	0	0	0	5	1	1
GO Molecular Function	GO:0003847	1-alkyl-2-acetylglycerophosphocholine esterase activity	2	0.397461	0	0	0	0	0	1	5	1	1
GO Molecular Function	GO:0003851	2-hydroxyacylsphingosine 1-beta-galactosyltransferase activity	0	0	0	0	0	0	0	0	1	1	1
GO Molecular Function	GO:0003857	3-hydroxyacyl-CoA dehydrogenase activity	0	0	0	0	0	0	0	0	8	1	1
GO Molecular Function	GO:0003858	3-hydroxybutyrate dehydrogenase activity	0	0	0	0	0	0	0	0	2	1	1
GO Molecular Function	GO:0003860	3-hydroxyisobutyryl-CoA hydrolase activity	0	0	0	0	0	0	0	0	1	1	1
GO Molecular Function	GO:0003863	3-methyl-2-oxobutanoate dehydrogenase (2-methylpropanoyl-transferring) activity	0	0	0	0	0	0	0	0	2	1	1
GO Molecular Function	GO:0003865	3-oxo-5-alpha-steroid 4-dehydrogenase activity	0	0	0	0	0	0	0	0	2	1	1
GO Molecular Function	GO:0003867	4-aminobutyrate transaminase activity	0	0	0	0	0	0	0	0	1	1	1
GO Molecular Function	GO:0003868	4-hydroxyphenylpyruvate dioxygenase activity	0	0	0	0	0	0	0	0	2	1	1
GO Molecular Function	GO:0003870	5-aminolevulinate synthase activity	0	0	0	0	0	0	0	0	2	1	1
GO Molecular Function	GO:0003872	6-phosphofructokinase activity	1	0.198731	0	0	0	0	0	1	3	1	1
GO Molecular Function	GO:0003874	6-pyruvoyltetrahydropterin synthase activity	0	0	0	0	0	0	0	0	1	1	1
GO Molecular Function	GO:0003875	ADP-ribosylarginine hydrolase activity	0	0	0	0	0	0	0	0	2	1	1
GO Molecular Function	GO:0003876	AMP deaminase activity	3	0.596192	0	0	0	0	0	2	3	1	1
GO Molecular Function	GO:0003878	ATP citrate synthase activity	0	0	0	0	0	0	0	0	2	1	1
GO Molecular Function	GO:0003880	protein C-terminal carboxyl O-methyltransferase activity	0	0	0	0	0	0	0	0	2	1	1
GO Molecular Function	GO:0003881	CDP-diacylglycerol-inositol 3-phosphatidyltransferase activity	0	0	0	0	0	0	0	0	1	1	1
GO Molecular Function	GO:0003883	CTP synthase activity	0	0	0	0	0	0	0	0	2	1	1
GO Molecular Function	GO:0003884	D-amino-acid oxidase activity	0	0	0	0	0	0	0	0	2	1	1
GO Molecular Function	GO:0003886	DNA (cytosine-5-)-methyltransferase activity	1	0.198731	0	0	0	0	0	1	4	1	1
GO Molecular Function	GO:0003887	DNA-directed DNA polymerase activity	14	2.78223	0	0	0	0	0	7	30	1	1
GO Molecular Function	GO:0003896	DNA primase activity	1	0.198731	0	0	0	0	0	1	4	1	1
GO Molecular Function	GO:0003910	DNA ligase (ATP) activity	0	0	0	0	0	0	0	0	3	1	1
GO Molecular Function	GO:0003912	DNA nucleotidylexotransferase activity	0	0	0	0	0	0	0	0	1	1	1
GO Molecular Function	GO:0003913	DNA photolyase activity	1	0.198731	0	0	0	0	0	1	2	1	1
GO Molecular Function	GO:0003916	DNA topoisomerase activity	2	0.397461	0	0	0	0	0	2	6	1	1
GO Molecular Function	GO:0003917	DNA topoisomerase type I activity	1	0.198731	0	0	0	0	0	1	4	1	1
GO Molecular Function	GO:0003918	DNA topoisomerase type II (ATP-hydrolyzing) activity	2	0.397461	0	0	0	0	0	2	4	1	1
GO Molecular Function	GO:0003919	FMN adenylyltransferase activity	0	0	0	0	0	0	0	0	1	1	1
GO Molecular Function	GO:0003920	GMP reductase activity	0	0	0	0	0	0	0	0	2	1	1
GO Molecular Function	GO:0003921	GMP synthase activity	0	0	0	0	0	0	0	0	1	1	1
GO Molecular Function	GO:0003922	GMP synthase (glutamine-hydrolyzing) activity	0	0	0	0	0	0	0	0	1	1	1
GO Molecular Function	GO:0003923	GPI-anchor transamidase activity	1	0.198731	0	0	0	0	0	1	5	1	1
GO Molecular Function	GO:0003934	GTP cyclohydrolase I activity	0	0	0	0	0	0	0	0	2	1	1
GO Molecular Function	GO:0003937	IMP cyclohydrolase activity	0	0	0	0	0	0	0	0	1	1	1
GO Molecular Function	GO:0003938	IMP dehydrogenase activity	2	0.397461	0	0	0	0	0	1	2	1	1
GO Molecular Function	GO:0003939	L-iditol 2-dehydrogenase activity	0	0	0	0	0	0	0	0	1	1	1
GO Molecular Function	GO:0003940	L-iduronidase activity	0	0	0	0	0	0	0	0	1	1	1
GO Molecular Function	GO:0003943	N-acetylgalactosamine-4-sulfatase activity	0	0	0	0	0	0	0	0	2	1	1
GO Molecular Function	GO:0003944	N-acetylglucosamine-1-phosphodiester alpha-N-acetylglucosaminidase activity	0	0	0	0	0	0	0	0	1	1	1
GO Molecular Function	GO:0003947	(N-acetylneuraminyl)-galactosylglucosylceramide N-acetylgalactosaminyltransferase activity	0	0	0	0	0	0	0	0	1	1	1
GO Molecular Function	GO:0003948	N4-(beta-N-acetylglucosaminyl)-L-asparaginase activity	0	0	0	0	0	0	0	0	2	1	1
GO Molecular Function	GO:0003952	NAD+ synthase (glutamine-hydrolyzing) activity	0	0	0	0	0	0	0	0	1	1	1
GO Molecular Function	GO:0003953	NAD+ nucleosidase activity	0	0	0	0	0	0	0	0	3	1	1
GO Molecular Function	GO:0003955	NAD(P)H dehydrogenase (quinone) activity	3	0.596192	0	0	0	0	0	1	2	1	1
GO Molecular Function	GO:0003956	NAD(P)+-protein-arginine ADP-ribosyltransferase activity	0	0	0	0	0	0	0	0	6	1	1
GO Molecular Function	GO:0003957	NAD(P)+ transhydrogenase (B-specific) activity	0	0	0	0	0	0	0	0	1	1	1
GO Molecular Function	GO:0003958	NADPH-hemoprotein reductase activity	0	0	0	0	0	0	0	0	5	1	1
GO Molecular Function	GO:0003963	RNA-3'-phosphate cyclase activity	1	0.198731	0	0	0	0	0	1	2	1	1
GO Molecular Function	GO:0003964	RNA-directed DNA polymerase activity	0	0	0	0	0	0	0	0	5	1	1
GO Molecular Function	GO:0003968	RNA-directed RNA polymerase activity	0	0	0	0	0	0	0	0	1	1	1
GO Molecular Function	GO:0003972	RNA ligase (ATP) activity	1	0.198731	0	0	0	0	0	1	1	1	1
GO Molecular Function	GO:0003975	UDP-N-acetylglucosamine-dolichyl-phosphate N-acetylglucosaminephosphotransferase activity	0	0	0	0	0	0	0	0	1	1	1
GO Molecular Function	GO:0003976	UDP-N-acetylglucosamine-lysosomal-enzyme N-acetylglucosaminephosphotransferase activity	0	0	0	0	0	0	0	0	1	1	1
GO Molecular Function	GO:0003977	UDP-N-acetylglucosamine diphosphorylase activity	0	0	0	0	0	0	0	0	1	1	1
GO Molecular Function	GO:0003978	UDP-glucose 4-epimerase activity	0	0	0	0	0	0	0	0	1	1	1
GO Molecular Function	GO:0003979	UDP-glucose 6-dehydrogenase activity	0	0	0	0	0	0	0	0	1	1	1
GO Molecular Function	GO:0003980	UDP-glucose:glycoprotein glucosyltransferase activity	0	0	0	0	0	0	0	0	2	1	1
GO Molecular Function	GO:0003983	UTP:glucose-1-phosphate uridylyltransferase activity	0	0	0	0	0	0	0	0	1	1	1
GO Molecular Function	GO:0003985	acetyl-CoA C-acetyltransferase activity	0	0	0	0	0	0	0	0	3	1	1
GO Molecular Function	GO:0003986	acetyl-CoA hydrolase activity	0	0	0	0	0	0	0	0	3	1	1
GO Molecular Function	GO:0003987	acetate-CoA ligase activity	2	0.397461	0	0	0	0	0	1	3	1	1
GO Molecular Function	GO:0003988	acetyl-CoA C-acyltransferase activity	0	0	0	0	0	0	0	0	6	1	1
GO Molecular Function	GO:0003989	acetyl-CoA carboxylase activity	1	0.198731	0	0	0	0	0	1	3	1	1
GO Molecular Function	GO:0003990	acetylcholinesterase activity	0	0	0	0	0	0	0	0	2	1	1
GO Molecular Function	GO:0003993	acid phosphatase activity	2	0.397461	0	0	0	0	0	2	11	1	1
GO Molecular Function	GO:0003994	aconitate hydratase activity	0	0	0	0	0	0	0	0	2	1	1
GO Molecular Function	GO:0003996	acyl-CoA ligase activity	0	0	0	0	0	0	0	0	1	1	1
GO Molecular Function	GO:0003997	acyl-CoA oxidase activity	0	0	0	0	0	0	0	0	6	1	1
GO Molecular Function	GO:0003998	acylphosphatase activity	0	0	0	0	0	0	0	0	2	1	1
GO Molecular Function	GO:0003999	adenine phosphoribosyltransferase activity	0	0	0	0	0	0	0	0	1	1	1
GO Molecular Function	GO:0004000	adenosine deaminase activity	1	0.198731	0	0	0	0	0	1	10	1	1
GO Molecular Function	GO:0004001	adenosine kinase activity	0	0	0	0	0	0	0	0	1	1	1
GO Molecular Function	GO:0004008	copper-exporting ATPase activity	0	0	0	0	0	0	0	0	2	1	1
GO Molecular Function	GO:0004013	adenosylhomocysteinase activity	7	1.39111	0	0	0	0	0	2	3	1	1
GO Molecular Function	GO:0004014	adenosylmethionine decarboxylase activity	0	0	0	0	0	0	0	0	1	1	1
GO Molecular Function	GO:0004017	adenylate kinase activity	0	0	0	0	0	0	0	0	7	1	1
GO Molecular Function	GO:0004019	adenylosuccinate synthase activity	0	0	0	0	0	0	0	0	2	1	1
GO Molecular Function	GO:0004020	adenylylsulfate kinase activity	0	0	0	0	0	0	0	0	2	1	1
GO Molecular Function	GO:0004021	L-alanine:2-oxoglutarate aminotransferase activity	0	0	0	0	0	0	0	0	2	1	1
GO Molecular Function	GO:0004022	alcohol dehydrogenase (NAD) activity	0	0	0	0	0	0	0	0	8	1	1
GO Molecular Function	GO:0004024	alcohol dehydrogenase activity, zinc-dependent	0	0	0	0	0	0	0	0	4	1	1
GO Molecular Function	GO:0004027	alcohol sulfotransferase activity	0	0	0	0	0	0	0	0	2	1	1
GO Molecular Function	GO:0004028	3-chloroallyl aldehyde dehydrogenase activity	0	0	0	0	0	0	0	0	5	1	1
GO Molecular Function	GO:0004029	aldehyde dehydrogenase (NAD) activity	2	0.397461	0	0	0	0	0	2	10	1	1
GO Molecular Function	GO:0004030	aldehyde dehydrogenase [NAD(P)+] activity	0	0	0	0	0	0	0	0	7	1	1
GO Molecular Function	GO:0004031	aldehyde oxidase activity	0	0	0	0	0	0	0	0	2	1	1
GO Molecular Function	GO:0004032	alditol:NADP+ 1-oxidoreductase activity	0	0	0	0	0	0	0	0	7	1	1
GO Molecular Function	GO:0004033	aldo-keto reductase (NADP) activity	3	0.596192	0	0	0	0	0	1	18	1	1
GO Molecular Function	GO:0004034	aldose 1-epimerase activity	0	0	0	0	0	0	0	0	1	1	1
GO Molecular Function	GO:0004035	alkaline phosphatase activity	0	0	0	0	0	0	0	0	4	1	1
GO Molecular Function	GO:0004037	allantoicase activity	0	0	0	0	0	0	0	0	1	1	1
GO Molecular Function	GO:0004040	amidase activity	0	0	0	0	0	0	0	0	1	1	1
GO Molecular Function	GO:0004042	acetyl-CoA:L-glutamate N-acetyltransferase activity	1	0.198731	0	0	0	0	0	1	1	1	1
GO Molecular Function	GO:0004043	L-aminoadipate-semialdehyde dehydrogenase activity	0	0	0	0	0	0	0	0	1	1	1
GO Molecular Function	GO:0004044	amidophosphoribosyltransferase activity	0	0	0	0	0	0	0	0	1	1	1
GO Molecular Function	GO:0004046	aminoacylase activity	0	0	0	0	0	0	0	0	6	1	1
GO Molecular Function	GO:0004047	aminomethyltransferase activity	0	0	0	0	0	0	0	0	6	1	1
GO Molecular Function	GO:0004051	arachidonate 5-lipoxygenase activity	1	0.198731	0	0	0	0	0	1	1	1	1
GO Molecular Function	GO:0004052	arachidonate 12-lipoxygenase activity	0	0	0	0	0	0	0	0	3	1	1
GO Molecular Function	GO:0004053	arginase activity	4	0.794923	0	0	0	0	0	1	2	1	1
GO Molecular Function	GO:0004055	argininosuccinate synthase activity	5	0.993653	0	0	0	0	0	1	1	1	1
GO Molecular Function	GO:0004056	argininosuccinate lyase activity	0	0	0	0	0	0	0	0	1	1	1
GO Molecular Function	GO:0004057	arginyltransferase activity	1	0.198731	0	0	0	0	0	1	1	1	1
GO Molecular Function	GO:0004058	aromatic-L-amino-acid decarboxylase activity	0	0	0	0	0	0	0	0	1	1	1
GO Molecular Function	GO:0004059	aralkylamine N-acetyltransferase activity	2	0.397461	0	0	0	0	0	1	1	1	1
GO Molecular Function	GO:0004060	arylamine N-acetyltransferase activity	2	0.397461	0	0	0	0	0	1	3	1	1
GO Molecular Function	GO:0004061	arylformamidase activity	0	0	0	0	0	0	0	0	1	1	1
GO Molecular Function	GO:0004062	aryl sulfotransferase activity	0	0	0	0	0	0	0	0	6	1	1
GO Molecular Function	GO:0004063	aryldialkylphosphatase activity	0	0	0	0	0	0	0	0	2	1	1
GO Molecular Function	GO:0004064	arylesterase activity	0	0	0	0	0	0	0	0	4	1	1
GO Molecular Function	GO:0004065	arylsulfatase activity	0	0	0	0	0	0	0	0	12	1	1
GO Molecular Function	GO:0004066	asparagine synthase (glutamine-hydrolyzing) activity	0	0	0	0	0	0	0	0	2	1	1
GO Molecular Function	GO:0004067	asparaginase activity	0	0	0	0	0	0	0	0	2	1	1
GO Molecular Function	GO:0004070	aspartate carbamoyltransferase activity	1	0.198731	0	0	0	0	0	1	1	1	1
GO Molecular Function	GO:0004074	biliverdin reductase activity	0	0	0	0	0	0	0	0	2	1	1
GO Molecular Function	GO:0004075	biotin carboxylase activity	1	0.198731	0	0	0	0	0	1	6	1	1
GO Molecular Function	GO:0004077	biotin-[acetyl-CoA-carboxylase] ligase activity	0	0	0	0	0	0	0	0	1	1	1
GO Molecular Function	GO:0004078	biotin-[methylcrotonoyl-CoA-carboxylase] ligase activity	0	0	0	0	0	0	0	0	1	1	1
GO Molecular Function	GO:0004079	biotin-[methylmalonyl-CoA-carboxytransferase] ligase activity	0	0	0	0	0	0	0	0	1	1	1
GO Molecular Function	GO:0004080	biotin-[propionyl-CoA-carboxylase (ATP-hydrolyzing)] ligase activity	0	0	0	0	0	0	0	0	1	1	1
GO Molecular Function	GO:0004081	bis(5'-nucleosyl)-tetraphosphatase (asymmetrical) activity	0	0	0	0	0	0	0	0	1	1	1
GO Molecular Function	GO:0004082	bisphosphoglycerate mutase activity	0	0	0	0	0	0	0	0	4	1	1
GO Molecular Function	GO:0004083	bisphosphoglycerate 2-phosphatase activity	0	0	0	0	0	0	0	0	4	1	1
GO Molecular Function	GO:0004085	butyryl-CoA dehydrogenase activity	0	0	0	0	0	0	0	0	1	1	1
GO Molecular Function	GO:0004087	carbamoyl-phosphate synthase (ammonia) activity	0	0	0	0	0	0	0	0	1	1	1
GO Molecular Function	GO:0004088	carbamoyl-phosphate synthase (glutamine-hydrolyzing) activity	1	0.198731	0	0	0	0	0	1	1	1	1
GO Molecular Function	GO:0004090	carbonyl reductase (NADPH) activity	0	0	0	0	0	0	0	0	5	1	1
GO Molecular Function	GO:0004092	carnitine O-acetyltransferase activity	0	0	0	0	0	0	0	0	1	1	1
GO Molecular Function	GO:0004095	carnitine O-palmitoyltransferase activity	1	0.198731	0	0	0	0	0	1	4	1	1
GO Molecular Function	GO:0004096	catalase activity	0	0	0	0	0	0	0	0	1	1	1
GO Molecular Function	GO:0004098	cerebroside-sulfatase activity	0	0	0	0	0	0	0	0	1	1	1
GO Molecular Function	GO:0004102	choline O-acetyltransferase activity	1	0.198731	0	0	0	0	0	1	1	1	1
GO Molecular Function	GO:0004103	choline kinase activity	4	0.794923	0	0	0	0	0	1	2	1	1
GO Molecular Function	GO:0004104	cholinesterase activity	4	0.794923	0	0	0	0	0	1	3	1	1
GO Molecular Function	GO:0004108	citrate (Si)-synthase activity	1	0.198731	0	0	0	0	0	1	1	1	1
GO Molecular Function	GO:0004109	coproporphyrinogen oxidase activity	0	0	0	0	0	0	0	0	2	1	1
GO Molecular Function	GO:0004111	creatine kinase activity	2	0.397461	0	0	0	0	0	1	5	1	1
GO Molecular Function	GO:0004113	2',3'-cyclic-nucleotide 3'-phosphodiesterase activity	0	0	0	0	0	0	0	0	1	1	1
GO Molecular Function	GO:0004119	cGMP-inhibited cyclic-nucleotide phosphodiesterase activity	1	0.198731	0	0	0	0	0	1	2	1	1
GO Molecular Function	GO:0004122	cystathionine beta-synthase activity	1	0.198731	0	0	0	0	0	1	1	1	1
GO Molecular Function	GO:0004123	cystathionine gamma-lyase activity	0	0	0	0	0	0	0	0	1	1	1
GO Molecular Function	GO:0004124	cysteine synthase activity	1	0.198731	0	0	0	0	0	1	1	1	1
GO Molecular Function	GO:0004126	cytidine deaminase activity	2	0.397461	0	0	0	0	0	2	8	1	1
GO Molecular Function	GO:0004127	cytidylate kinase activity	0	0	0	0	0	0	0	0	4	1	1
GO Molecular Function	GO:0004128	cytochrome-b5 reductase activity, acting on NAD(P)H	3	0.596192	0	0	0	0	0	1	7	1	1
GO Molecular Function	GO:0004129	cytochrome-c oxidase activity	3	0.596192	0	0	0	0	0	2	28	1	1
GO Molecular Function	GO:0004132	dCMP deaminase activity	0	0	0	0	0	0	0	0	1	1	1
GO Molecular Function	GO:0004134	4-alpha-glucanotransferase activity	0	0	0	0	0	0	0	0	1	1	1
GO Molecular Function	GO:0004135	amylo-alpha-1,6-glucosidase activity	0	0	0	0	0	0	0	0	1	1	1
GO Molecular Function	GO:0004137	deoxycytidine kinase activity	0	0	0	0	0	0	0	0	2	1	1
GO Molecular Function	GO:0004138	deoxyguanosine kinase activity	0	0	0	0	0	0	0	0	1	1	1
GO Molecular Function	GO:0004139	deoxyribose-phosphate aldolase activity	1	0.198731	0	0	0	0	0	1	1	1	1
GO Molecular Function	GO:0004140	dephospho-CoA kinase activity	5	0.993653	0	0	0	0	0	1	2	1	1
GO Molecular Function	GO:0004142	diacylglycerol cholinephosphotransferase activity	0	0	0	0	0	0	0	0	3	1	1
GO Molecular Function	GO:0004144	diacylglycerol O-acyltransferase activity	0	0	0	0	0	0	0	0	4	1	1
GO Molecular Function	GO:0004146	dihydrofolate reductase activity	0	0	0	0	0	0	0	0	2	1	1
GO Molecular Function	GO:0004148	dihydrolipoyl dehydrogenase activity	0	0	0	0	0	0	0	0	1	1	1
GO Molecular Function	GO:0004149	dihydrolipoyllysine-residue succinyltransferase activity	2	0.397461	0	0	0	0	0	1	1	1	1
GO Molecular Function	GO:0004151	dihydroorotase activity	1	0.198731	0	0	0	0	0	1	1	1	1
GO Molecular Function	GO:0004155	6,7-dihydropteridine reductase activity	0	0	0	0	0	0	0	0	1	1	1
GO Molecular Function	GO:0004157	dihydropyrimidinase activity	1	0.198731	0	0	0	0	0	1	2	1	1
GO Molecular Function	GO:0004158	dihydroorotate oxidase activity	0	0	0	0	0	0	0	0	2	1	1
GO Molecular Function	GO:0004161	dimethylallyltranstransferase activity	0	0	0	0	0	0	0	0	2	1	1
GO Molecular Function	GO:0004163	diphosphomevalonate decarboxylase activity	0	0	0	0	0	0	0	0	1	1	1
GO Molecular Function	GO:0004164	diphthine synthase activity	0	0	0	0	0	0	0	0	1	1	1
GO Molecular Function	GO:0004165	dodecenoyl-CoA delta-isomerase activity	0	0	0	0	0	0	0	0	3	1	1
GO Molecular Function	GO:0004167	dopachrome isomerase activity	0	0	0	0	0	0	0	0	3	1	1
GO Molecular Function	GO:0004168	dolichol kinase activity	1	0.198731	0	0	0	0	0	1	1	1	1
GO Molecular Function	GO:0004169	dolichyl-phosphate-mannose-protein mannosyltransferase activity	7	1.39111	0	0	0	0	0	1	4	1	1
GO Molecular Function	GO:0004170	dUTP diphosphatase activity	0	0	0	0	0	0	0	0	1	1	1
GO Molecular Function	GO:0004174	electron-transferring-flavoprotein dehydrogenase activity	1	0.198731	0	0	0	0	0	1	2	1	1
GO Molecular Function	GO:0004176	ATP-dependent peptidase activity	1	0.198731	0	0	0	0	0	1	7	1	1
GO Molecular Function	GO:0004185	serine-type carboxypeptidase activity	0	0	0	0	0	0	0	0	5	1	1
GO Molecular Function	GO:0004198	calcium-dependent cysteine-type endopeptidase activity	22	4.37207	0	0	0	0	0	4	16	1	1
GO Molecular Function	GO:0004300	enoyl-CoA hydratase activity	0	0	0	0	0	0	0	0	5	1	1
GO Molecular Function	GO:0004301	epoxide hydrolase activity	2	0.397461	0	0	0	0	0	1	5	1	1
GO Molecular Function	GO:0004304	estrone sulfotransferase activity	0	0	0	0	0	0	0	0	1	1	1
GO Molecular Function	GO:0004305	ethanolamine kinase activity	11	2.18604	0	0	0	0	0	3	4	1	1
GO Molecular Function	GO:0004306	ethanolamine-phosphate cytidylyltransferase activity	0	0	0	0	0	0	0	0	1	1	1
GO Molecular Function	GO:0004307	ethanolaminephosphotransferase activity	0	0	0	0	0	0	0	0	3	1	1
GO Molecular Function	GO:0004310	farnesyl-diphosphate farnesyltransferase activity	0	0	0	0	0	0	0	0	1	1	1
GO Molecular Function	GO:0004311	farnesyltranstransferase activity	0	0	0	0	0	0	0	0	5	1	1
GO Molecular Function	GO:0004312	fatty acid synthase activity	0	0	0	0	0	0	0	0	7	1	1
GO Molecular Function	GO:0004313	[acyl-carrier-protein] S-acetyltransferase activity	0	0	0	0	0	0	0	0	1	1	1
GO Molecular Function	GO:0004314	[acyl-carrier-protein] S-malonyltransferase activity	0	0	0	0	0	0	0	0	2	1	1
GO Molecular Function	GO:0004315	3-oxoacyl-[acyl-carrier-protein] synthase activity	0	0	0	0	0	0	0	0	2	1	1
GO Molecular Function	GO:0004316	3-oxoacyl-[acyl-carrier-protein] reductase (NADPH) activity	0	0	0	0	0	0	0	0	1	1	1
GO Molecular Function	GO:0004317	3-hydroxypalmitoyl-[acyl-carrier-protein] dehydratase activity	0	0	0	0	0	0	0	0	1	1	1
GO Molecular Function	GO:0004319	enoyl-[acyl-carrier-protein] reductase (NADPH, B-specific) activity	0	0	0	0	0	0	0	0	1	1	1
GO Molecular Function	GO:0004320	oleoyl-[acyl-carrier-protein] hydrolase activity	0	0	0	0	0	0	0	0	2	1	1
GO Molecular Function	GO:0004321	fatty-acyl-CoA synthase activity	1	0.198731	0	0	0	0	0	1	2	1	1
GO Molecular Function	GO:0004322	ferroxidase activity	0	0	0	0	0	0	0	0	5	1	1
GO Molecular Function	GO:0004324	ferredoxin-NADP+ reductase activity	0	0	0	0	0	0	0	0	1	1	1
GO Molecular Function	GO:0004326	tetrahydrofolylpolyglutamate synthase activity	0	0	0	0	0	0	0	0	1	1	1
GO Molecular Function	GO:0004329	formate-tetrahydrofolate ligase activity	1	0.198731	0	0	0	0	0	1	3	1	1
GO Molecular Function	GO:0004332	fructose-bisphosphate aldolase activity	0	0	0	0	0	0	0	0	3	1	1
GO Molecular Function	GO:0004333	fumarate hydratase activity	0	0	0	0	0	0	0	0	1	1	1
GO Molecular Function	GO:0004334	fumarylacetoacetase activity	0	0	0	0	0	0	0	0	1	1	1
GO Molecular Function	GO:0004335	galactokinase activity	1	0.198731	0	0	0	0	0	1	2	1	1
GO Molecular Function	GO:0004336	galactosylceramidase activity	0	0	0	0	0	0	0	0	1	1	1
GO Molecular Function	GO:0004337	geranyltranstransferase activity	0	0	0	0	0	0	0	0	2	1	1
GO Molecular Function	GO:0004339	glucan 1,4-alpha-glucosidase activity	0	0	0	0	0	0	0	0	1	1	1
GO Molecular Function	GO:0004341	gluconolactonase activity	0	0	0	0	0	0	0	0	1	1	1
GO Molecular Function	GO:0004342	glucosamine-6-phosphate deaminase activity	0	0	0	0	0	0	0	0	2	1	1
GO Molecular Function	GO:0004343	glucosamine 6-phosphate N-acetyltransferase activity	0	0	0	0	0	0	0	0	1	1	1
GO Molecular Function	GO:0004345	glucose-6-phosphate dehydrogenase activity	0	0	0	0	0	0	0	0	2	1	1
GO Molecular Function	GO:0004347	glucose-6-phosphate isomerase activity	0	0	0	0	0	0	0	0	1	1	1
GO Molecular Function	GO:0004348	glucosylceramidase activity	1	0.198731	0	0	0	0	0	1	2	1	1
GO Molecular Function	GO:0004349	glutamate 5-kinase activity	0	0	0	0	0	0	0	0	1	1	1
GO Molecular Function	GO:0004350	glutamate-5-semialdehyde dehydrogenase activity	0	0	0	0	0	0	0	0	1	1	1
GO Molecular Function	GO:0004351	glutamate decarboxylase activity	1	0.198731	0	0	0	0	0	1	3	1	1
GO Molecular Function	GO:0004352	glutamate dehydrogenase (NAD+) activity	0	0	0	0	0	0	0	0	2	1	1
GO Molecular Function	GO:0004353	glutamate dehydrogenase [NAD(P)+] activity	0	0	0	0	0	0	0	0	2	1	1
GO Molecular Function	GO:0004356	glutamate-ammonia ligase activity	0	0	0	0	0	0	0	0	2	1	1
GO Molecular Function	GO:0004357	glutamate-cysteine ligase activity	0	0	0	0	0	0	0	0	2	1	1
GO Molecular Function	GO:0004360	glutamine-fructose-6-phosphate transaminase (isomerizing) activity	1	0.198731	0	0	0	0	0	1	2	1	1
GO Molecular Function	GO:0004361	glutaryl-CoA dehydrogenase activity	0	0	0	0	0	0	0	0	1	1	1
GO Molecular Function	GO:0004362	glutathione-disulfide reductase activity	0	0	0	0	0	0	0	0	1	1	1
GO Molecular Function	GO:0004363	glutathione synthase activity	1	0.198731	0	0	0	0	0	1	1	1	1
GO Molecular Function	GO:0004364	glutathione transferase activity	1	0.198731	0	0	0	0	0	1	23	1	1
GO Molecular Function	GO:0004366	glycerol-3-phosphate O-acyltransferase activity	0	0	0	0	0	0	0	0	4	1	1
GO Molecular Function	GO:0004367	glycerol-3-phosphate dehydrogenase [NAD+] activity	1	0.198731	0	0	0	0	0	1	2	1	1
GO Molecular Function	GO:0004368	glycerol-3-phosphate dehydrogenase activity	1	0.198731	0	0	0	0	0	1	2	1	1
GO Molecular Function	GO:0004370	glycerol kinase activity	0	0	0	0	0	0	0	0	3	1	1
GO Molecular Function	GO:0004371	glycerone kinase activity	1	0.198731	0	0	0	0	0	1	1	1	1
GO Molecular Function	GO:0004373	glycogen (starch) synthase activity	0	0	0	0	0	0	0	0	2	1	1
GO Molecular Function	GO:0004375	glycine dehydrogenase (decarboxylating) activity	0	0	0	0	0	0	0	0	1	1	1
GO Molecular Function	GO:0004376	glycolipid mannosyltransferase activity	0	0	0	0	0	0	0	0	2	1	1
GO Molecular Function	GO:0004377	GDP-Man:Man3GlcNAc2-PP-Dol alpha-1,2-mannosyltransferase activity	0	0	0	0	0	0	0	0	1	1	1
GO Molecular Function	GO:0004378	GDP-Man:Man1GlcNAc2-PP-Dol alpha-1,3-mannosyltransferase activity	0	0	0	0	0	0	0	0	1	1	1
GO Molecular Function	GO:0004379	glycylpeptide N-tetradecanoyltransferase activity	2	0.397461	0	0	0	0	0	2	2	1	1
GO Molecular Function	GO:0004382	guanosine-diphosphatase activity	0	0	0	0	0	0	0	0	1	1	1
GO Molecular Function	GO:0004385	guanylate kinase activity	5	0.993653	0	0	0	0	0	3	11	1	1
GO Molecular Function	GO:0004392	heme oxygenase (decyclizing) activity	0	0	0	0	0	0	0	0	2	1	1
GO Molecular Function	GO:0004397	histidine ammonia-lyase activity	2	0.397461	0	0	0	0	0	1	1	1	1
GO Molecular Function	GO:0004398	histidine decarboxylase activity	2	0.397461	0	0	0	0	0	1	1	1	1
GO Molecular Function	GO:0004408	holocytochrome-c synthase activity	0	0	0	0	0	0	0	0	1	1	1
GO Molecular Function	GO:0004411	homogentisate 1,2-dioxygenase activity	1	0.198731	0	0	0	0	0	1	1	1	1
GO Molecular Function	GO:0004415	hyalurononglucosaminidase activity	21	4.17334	0	0	0	0	0	1	7	1	1
GO Molecular Function	GO:0004416	hydroxyacylglutathione hydrolase activity	0	0	0	0	0	0	0	0	3	1	1
GO Molecular Function	GO:0004418	hydroxymethylbilane synthase activity	2	0.397461	0	0	0	0	0	1	1	1	1
GO Molecular Function	GO:0004419	hydroxymethylglutaryl-CoA lyase activity	0	0	0	0	0	0	0	0	2	1	1
GO Molecular Function	GO:0004420	hydroxymethylglutaryl-CoA reductase (NADPH) activity	0	0	0	0	0	0	0	0	1	1	1
GO Molecular Function	GO:0004421	hydroxymethylglutaryl-CoA synthase activity	0	0	0	0	0	0	0	0	2	1	1
GO Molecular Function	GO:0004422	hypoxanthine phosphoribosyltransferase activity	0	0	0	0	0	0	0	0	1	1	1
GO Molecular Function	GO:0004423	iduronate-2-sulfatase activity	0	0	0	0	0	0	0	0	1	1	1
GO Molecular Function	GO:0004427	inorganic diphosphatase activity	0	0	0	0	0	0	0	0	4	1	1
GO Molecular Function	GO:0004438	phosphatidylinositol-3-phosphatase activity	4	0.794923	0	0	0	0	0	4	7	1	1
GO Molecular Function	GO:0004441	inositol-1,4-bisphosphate 1-phosphatase activity	0	0	0	0	0	0	0	0	2	1	1
GO Molecular Function	GO:0004447	iodide peroxidase activity	0	0	0	0	0	0	0	0	2	1	1
GO Molecular Function	GO:0004449	isocitrate dehydrogenase (NAD+) activity	3	0.596192	0	0	0	0	0	3	3	1	1
GO Molecular Function	GO:0004452	isopentenyl-diphosphate delta-isomerase activity	0	0	0	0	0	0	0	0	2	1	1
GO Molecular Function	GO:0004454	ketohexokinase activity	0	0	0	0	0	0	0	0	1	1	1
GO Molecular Function	GO:0004457	lactate dehydrogenase activity	0	0	0	0	0	0	0	0	6	1	1
GO Molecular Function	GO:0004458	D-lactate dehydrogenase (cytochrome) activity	0	0	0	0	0	0	0	0	1	1	1
GO Molecular Function	GO:0004459	L-lactate dehydrogenase activity	0	0	0	0	0	0	0	0	5	1	1
GO Molecular Function	GO:0004462	lactoylglutathione lyase activity	0	0	0	0	0	0	0	0	1	1	1
GO Molecular Function	GO:0004463	leukotriene-A4 hydrolase activity	2	0.397461	0	0	0	0	0	1	1	1	1
GO Molecular Function	GO:0004464	leukotriene-C4 synthase activity	1	0.198731	0	0	0	0	0	1	2	1	1
GO Molecular Function	GO:0004465	lipoprotein lipase activity	0	0	0	0	0	0	0	0	3	1	1
GO Molecular Function	GO:0004467	long-chain fatty acid-CoA ligase activity	0	0	0	0	0	0	0	0	10	1	1
GO Molecular Function	GO:0004468	lysine N-acetyltransferase activity	1	0.198731	0	0	0	0	0	1	2	1	1
GO Molecular Function	GO:0004470	malic enzyme activity	1	0.198731	0	0	0	0	0	1	4	1	1
GO Molecular Function	GO:0004471	malate dehydrogenase (decarboxylating) (NAD+) activity	1	0.198731	0	0	0	0	0	1	1	1	1
GO Molecular Function	GO:0004473	malate dehydrogenase (decarboxylating) (NADP+) activity	0	0	0	0	0	0	0	0	2	1	1
GO Molecular Function	GO:0004475	mannose-1-phosphate guanylyltransferase activity	2	0.397461	0	0	0	0	0	1	2	1	1
GO Molecular Function	GO:0004477	methenyltetrahydrofolate cyclohydrolase activity	0	0	0	0	0	0	0	0	3	1	1
GO Molecular Function	GO:0004478	methionine adenosyltransferase activity	3	0.596192	0	0	0	0	0	1	2	1	1
GO Molecular Function	GO:0004479	methionyl-tRNA formyltransferase activity	0	0	0	0	0	0	0	0	1	1	1
GO Molecular Function	GO:0004482	mRNA (guanine-N7-)-methyltransferase activity	0	0	0	0	0	0	0	0	1	1	1
GO Molecular Function	GO:0004483	mRNA (nucleoside-2'-O-)-methyltransferase activity	1	0.198731	0	0	0	0	0	1	2	1	1
GO Molecular Function	GO:0004484	mRNA guanylyltransferase activity	0	0	0	0	0	0	0	0	1	1	1
GO Molecular Function	GO:0004485	methylcrotonoyl-CoA carboxylase activity	1	0.198731	0	0	0	0	0	1	2	1	1
GO Molecular Function	GO:0004486	methylenetetrahydrofolate dehydrogenase [NAD(P)+] activity	0	0	0	0	0	0	0	0	1	1	1
GO Molecular Function	GO:0004487	methylenetetrahydrofolate dehydrogenase (NAD+) activity	0	0	0	0	0	0	0	0	2	1	1
GO Molecular Function	GO:0004488	methylenetetrahydrofolate dehydrogenase (NADP+) activity	1	0.198731	0	0	0	0	0	1	4	1	1
GO Molecular Function	GO:0004489	methylenetetrahydrofolate reductase (NAD(P)H) activity	0	0	0	0	0	0	0	0	1	1	1
GO Molecular Function	GO:0004490	methylglutaconyl-CoA hydratase activity	0	0	0	0	0	0	0	0	1	1	1
GO Molecular Function	GO:0004491	methylmalonate-semialdehyde dehydrogenase (acylating) activity	0	0	0	0	0	0	0	0	1	1	1
GO Molecular Function	GO:0004492	methylmalonyl-CoA decarboxylase activity	0	0	0	0	0	0	0	0	1	1	1
GO Molecular Function	GO:0004493	methylmalonyl-CoA epimerase activity	0	0	0	0	0	0	0	0	1	1	1
GO Molecular Function	GO:0004494	methylmalonyl-CoA mutase activity	0	0	0	0	0	0	0	0	1	1	1
GO Molecular Function	GO:0004496	mevalonate kinase activity	0	0	0	0	0	0	0	0	1	1	1
GO Molecular Function	GO:0004498	calcidiol 1-monooxygenase activity	0	0	0	0	0	0	0	0	1	1	1
GO Molecular Function	GO:0004499	N,N-dimethylaniline monooxygenase activity	0	0	0	0	0	0	0	0	6	1	1
GO Molecular Function	GO:0004500	dopamine beta-monooxygenase activity	1	0.198731	0	0	0	0	0	1	2	1	1
GO Molecular Function	GO:0004502	kynurenine 3-monooxygenase activity	0	0	0	0	0	0	0	0	1	1	1
GO Molecular Function	GO:0004503	monophenol monooxygenase activity	0	0	0	0	0	0	0	0	1	1	1
GO Molecular Function	GO:0004504	peptidylglycine monooxygenase activity	1	0.198731	0	0	0	0	0	1	1	1	1
GO Molecular Function	GO:0004505	phenylalanine 4-monooxygenase activity	4	0.794923	0	0	0	0	0	2	3	1	1
GO Molecular Function	GO:0004506	squalene monooxygenase activity	0	0	0	0	0	0	0	0	1	1	1
GO Molecular Function	GO:0004507	steroid 11-beta-monooxygenase activity	0	0	0	0	0	0	0	0	2	1	1
GO Molecular Function	GO:0004508	steroid 17-alpha-monooxygenase activity	0	0	0	0	0	0	0	0	1	1	1
GO Molecular Function	GO:0004509	steroid 21-monooxygenase activity	0	0	0	0	0	0	0	0	1	1	1
GO Molecular Function	GO:0004510	tryptophan 5-monooxygenase activity	0	0	0	0	0	0	0	0	2	1	1
GO Molecular Function	GO:0004511	tyrosine 3-monooxygenase activity	0	0	0	0	0	0	0	0	1	1	1
GO Molecular Function	GO:0004512	inositol-3-phosphate synthase activity	0	0	0	0	0	0	0	0	1	1	1
GO Molecular Function	GO:0004513	neolactotetraosylceramide alpha-2,3-sialyltransferase activity	0	0	0	0	0	0	0	0	1	1	1
GO Molecular Function	GO:0004514	nicotinate-nucleotide diphosphorylase (carboxylating) activity	0	0	0	0	0	0	0	0	4	1	1
GO Molecular Function	GO:0004515	nicotinate-nucleotide adenylyltransferase activity	0	0	0	0	0	0	0	0	4	1	1
GO Molecular Function	GO:0004516	nicotinate phosphoribosyltransferase activity	0	0	0	0	0	0	0	0	2	1	1
GO Molecular Function	GO:0004517	nitric-oxide synthase activity	0	0	0	0	0	0	0	0	3	1	1
GO Molecular Function	GO:0004520	endodeoxyribonuclease activity	1	0.198731	0	0	0	0	0	1	31	1	1
GO Molecular Function	GO:0004522	pancreatic ribonuclease activity	0	0	0	0	0	0	0	0	4	1	1
GO Molecular Function	GO:0004523	ribonuclease H activity	0	0	0	0	0	0	0	0	7	1	1
GO Molecular Function	GO:0004525	ribonuclease III activity	3	0.596192	0	0	0	0	0	2	3	1	1
GO Molecular Function	GO:0004526	ribonuclease P activity	2	0.397461	0	0	0	0	0	1	10	1	1
GO Molecular Function	GO:0004528	phosphodiesterase I activity	1	0.198731	0	0	0	0	0	1	5	1	1
GO Molecular Function	GO:0004530	deoxyribonuclease I activity	0	0	0	0	0	0	0	0	1	1	1
GO Molecular Function	GO:0004531	deoxyribonuclease II activity	0	0	0	0	0	0	0	0	2	1	1
GO Molecular Function	GO:0004536	deoxyribonuclease activity	4	0.794923	0	0	0	0	0	3	43	1	1
GO Molecular Function	GO:0004549	tRNA-specific ribonuclease activity	2	0.397461	0	0	0	0	0	1	13	1	1
GO Molecular Function	GO:0004550	nucleoside diphosphate kinase activity	4	0.794923	0	0	0	0	0	2	19	1	1
GO Molecular Function	GO:0004551	nucleotide diphosphatase activity	1	0.198731	0	0	0	0	0	1	7	1	1
GO Molecular Function	GO:0004556	alpha-amylase activity	0	0	0	0	0	0	0	0	5	1	1
GO Molecular Function	GO:0004557	alpha-galactosidase activity	0	0	0	0	0	0	0	0	2	1	1
GO Molecular Function	GO:0004558	alpha-glucosidase activity	0	0	0	0	0	0	0	0	6	1	1
GO Molecular Function	GO:0004559	alpha-mannosidase activity	3	0.596192	0	0	0	0	0	3	15	1	1
GO Molecular Function	GO:0004560	alpha-L-fucosidase activity	0	0	0	0	0	0	0	0	2	1	1
GO Molecular Function	GO:0004561	alpha-N-acetylglucosaminidase activity	3	0.596192	0	0	0	0	0	1	1	1	1
GO Molecular Function	GO:0004563	beta-N-acetylhexosaminidase activity	0	0	0	0	0	0	0	0	4	1	1
GO Molecular Function	GO:0004565	beta-galactosidase activity	0	0	0	0	0	0	0	0	5	1	1
GO Molecular Function	GO:0004566	beta-glucuronidase activity	0	0	0	0	0	0	0	0	3	1	1
GO Molecular Function	GO:0004567	beta-mannosidase activity	0	0	0	0	0	0	0	0	1	1	1
GO Molecular Function	GO:0004568	chitinase activity	0	0	0	0	0	0	0	0	6	1	1
GO Molecular Function	GO:0004569	glycoprotein endo-alpha-1,2-mannosidase activity	0	0	0	0	0	0	0	0	2	1	1
GO Molecular Function	GO:0004571	mannosyl-oligosaccharide 1,2-alpha-mannosidase activity	2	0.397461	0	0	0	0	0	2	8	1	1
GO Molecular Function	GO:0004572	mannosyl-oligosaccharide 1,3-1,6-alpha-mannosidase activity	0	0	0	0	0	0	0	0	2	1	1
GO Molecular Function	GO:0004573	mannosyl-oligosaccharide glucosidase activity	1	0.198731	0	0	0	0	0	1	1	1	1
GO Molecular Function	GO:0004574	oligo-1,6-glucosidase activity	0	0	0	0	0	0	0	0	1	1	1
GO Molecular Function	GO:0004575	sucrose alpha-glucosidase activity	0	0	0	0	0	0	0	0	1	1	1
GO Molecular Function	GO:0004577	N-acetylglucosaminyldiphosphodolichol N-acetylglucosaminyltransferase activity	0	0	0	0	0	0	0	0	1	1	1
GO Molecular Function	GO:0004578	chitobiosyldiphosphodolichol beta-mannosyltransferase activity	0	0	0	0	0	0	0	0	1	1	1
GO Molecular Function	GO:0004581	dolichyl-phosphate beta-glucosyltransferase activity	0	0	0	0	0	0	0	0	1	1	1
GO Molecular Function	GO:0004582	dolichyl-phosphate beta-D-mannosyltransferase activity	0	0	0	0	0	0	0	0	3	1	1
GO Molecular Function	GO:0004585	ornithine carbamoyltransferase activity	0	0	0	0	0	0	0	0	1	1	1
GO Molecular Function	GO:0004586	ornithine decarboxylase activity	3	0.596192	0	0	0	0	0	1	1	1	1
GO Molecular Function	GO:0004587	ornithine-oxo-acid transaminase activity	0	0	0	0	0	0	0	0	1	1	1
GO Molecular Function	GO:0004588	orotate phosphoribosyltransferase activity	0	0	0	0	0	0	0	0	1	1	1
GO Molecular Function	GO:0004590	orotidine-5'-phosphate decarboxylase activity	0	0	0	0	0	0	0	0	1	1	1
GO Molecular Function	GO:0004591	oxoglutarate dehydrogenase (succinyl-transferring) activity	7	1.39111	0	0	0	0	0	2	3	1	1
GO Molecular Function	GO:0004594	pantothenate kinase activity	3	0.596192	0	0	0	0	0	2	4	1	1
GO Molecular Function	GO:0004595	pantetheine-phosphate adenylyltransferase activity	0	0	0	0	0	0	0	0	1	1	1
GO Molecular Function	GO:0004597	peptide-aspartate beta-dioxygenase activity	0	0	0	0	0	0	0	0	1	1	1
GO Molecular Function	GO:0004598	peptidylamidoglycolate lyase activity	1	0.198731	0	0	0	0	0	1	1	1	1
GO Molecular Function	GO:0004602	glutathione peroxidase activity	2	0.397461	0	0	0	0	0	2	17	1	1
GO Molecular Function	GO:0004603	phenylethanolamine N-methyltransferase activity	0	0	0	0	0	0	0	0	1	1	1
GO Molecular Function	GO:0004605	phosphatidate cytidylyltransferase activity	0	0	0	0	0	0	0	0	2	1	1
GO Molecular Function	GO:0004607	phosphatidylcholine-sterol O-acyltransferase activity	1	0.198731	0	0	0	0	0	1	1	1	1
GO Molecular Function	GO:0004608	phosphatidylethanolamine N-methyltransferase activity	0	0	0	0	0	0	0	0	1	1	1
GO Molecular Function	GO:0004609	phosphatidylserine decarboxylase activity	1	0.198731	0	0	0	0	0	1	2	1	1
GO Molecular Function	GO:0004610	phosphoacetylglucosamine mutase activity	0	0	0	0	0	0	0	0	1	1	1
GO Molecular Function	GO:0004613	phosphoenolpyruvate carboxykinase (GTP) activity	0	0	0	0	0	0	0	0	2	1	1
GO Molecular Function	GO:0004614	phosphoglucomutase activity	2	0.397461	0	0	0	0	0	2	4	1	1
GO Molecular Function	GO:0004615	phosphomannomutase activity	0	0	0	0	0	0	0	0	2	1	1
GO Molecular Function	GO:0004617	phosphoglycerate dehydrogenase activity	0	0	0	0	0	0	0	0	1	1	1
GO Molecular Function	GO:0004618	phosphoglycerate kinase activity	0	0	0	0	0	0	0	0	2	1	1
GO Molecular Function	GO:0004619	phosphoglycerate mutase activity	0	0	0	0	0	0	0	0	4	1	1
GO Molecular Function	GO:0004621	glycosylphosphatidylinositol phospholipase D activity	0	0	0	0	0	0	0	0	1	1	1
GO Molecular Function	GO:0004622	lysophospholipase activity	5	0.993653	0	0	0	0	0	4	13	1	1
GO Molecular Function	GO:0004623	phospholipase A2 activity	21	4.17334	0	0	0	0	0	4	29	1	1
GO Molecular Function	GO:0004631	phosphomevalonate kinase activity	0	0	0	0	0	0	0	0	1	1	1
GO Molecular Function	GO:0004632	phosphopantothenate--cysteine ligase activity	0	0	0	0	0	0	0	0	1	1	1
GO Molecular Function	GO:0004633	phosphopantothenoylcysteine decarboxylase activity	0	0	0	0	0	0	0	0	1	1	1
GO Molecular Function	GO:0004634	phosphopyruvate hydratase activity	0	0	0	0	0	0	0	0	6	1	1
GO Molecular Function	GO:0004638	phosphoribosylaminoimidazole carboxylase activity	0	0	0	0	0	0	0	0	1	1	1
GO Molecular Function	GO:0004639	phosphoribosylaminoimidazolesuccinocarboxamide synthase activity	0	0	0	0	0	0	0	0	1	1	1
GO Molecular Function	GO:0004642	phosphoribosylformylglycinamidine synthase activity	0	0	0	0	0	0	0	0	1	1	1
GO Molecular Function	GO:0004643	phosphoribosylaminoimidazolecarboxamide formyltransferase activity	0	0	0	0	0	0	0	0	1	1	1
GO Molecular Function	GO:0004647	phosphoserine phosphatase activity	0	0	0	0	0	0	0	0	3	1	1
GO Molecular Function	GO:0004648	O-phospho-L-serine:2-oxoglutarate aminotransferase activity	0	0	0	0	0	0	0	0	1	1	1
GO Molecular Function	GO:0004649	poly(ADP-ribose) glycohydrolase activity	1	0.198731	0	0	0	0	0	1	2	1	1
GO Molecular Function	GO:0004651	polynucleotide 5'-phosphatase activity	0	0	0	0	0	0	0	0	1	1	1
GO Molecular Function	GO:0004652	polynucleotide adenylyltransferase activity	10	1.98731	0	0	0	0	0	2	6	1	1
GO Molecular Function	GO:0004653	polypeptide N-acetylgalactosaminyltransferase activity	13	2.5835	0	0	0	0	0	5	20	1	1
GO Molecular Function	GO:0004654	polyribonucleotide nucleotidyltransferase activity	0	0	0	0	0	0	0	0	1	1	1
GO Molecular Function	GO:0004655	porphobilinogen synthase activity	0	0	0	0	0	0	0	0	1	1	1
GO Molecular Function	GO:0004656	procollagen-proline 4-dioxygenase activity	2	0.397461	0	0	0	0	0	2	4	1	1
GO Molecular Function	GO:0004657	proline dehydrogenase activity	0	0	0	0	0	0	0	0	2	1	1
GO Molecular Function	GO:0004658	propionyl-CoA carboxylase activity	1	0.198731	0	0	0	0	0	1	2	1	1
GO Molecular Function	GO:0004659	prenyltransferase activity	1	0.198731	0	0	0	0	0	1	16	1	1
GO Molecular Function	GO:0004660	protein farnesyltransferase activity	0	0	0	0	0	0	0	0	3	1	1
GO Molecular Function	GO:0004661	protein geranylgeranyltransferase activity	0	0	0	0	0	0	0	0	6	1	1
GO Molecular Function	GO:0004662	CAAX-protein geranylgeranyltransferase activity	0	0	0	0	0	0	0	0	2	1	1
GO Molecular Function	GO:0004663	Rab geranylgeranyltransferase activity	0	0	0	0	0	0	0	0	4	1	1
GO Molecular Function	GO:0004666	prostaglandin-endoperoxide synthase activity	5	0.993653	0	0	0	0	0	1	2	1	1
GO Molecular Function	GO:0004667	prostaglandin-D synthase activity	0	0	0	0	0	0	0	0	2	1	1
GO Molecular Function	GO:0004668	protein-arginine deiminase activity	0	0	0	0	0	0	0	0	4	1	1
GO Molecular Function	GO:0004671	protein C-terminal S-isoprenylcysteine carboxyl O-methyltransferase activity	0	0	0	0	0	0	0	0	1	1	1
GO Molecular Function	GO:0004676	3-phosphoinositide-dependent protein kinase activity	0	0	0	0	0	0	0	0	1	1	1
GO Molecular Function	GO:0004677	DNA-dependent protein kinase activity	0	0	0	0	0	0	0	0	4	1	1
GO Molecular Function	GO:0004679	AMP-activated protein kinase activity	0	0	0	0	0	0	0	0	5	1	1
GO Molecular Function	GO:0004686	elongation factor-2 kinase activity	0	0	0	0	0	0	0	0	1	1	1
GO Molecular Function	GO:0004687	myosin light chain kinase activity	1	0.198731	0	0	0	0	0	1	3	1	1
GO Molecular Function	GO:0004689	phosphorylase kinase activity	2	0.397461	0	0	0	0	0	2	4	1	1
GO Molecular Function	GO:0004693	cyclin-dependent protein serine/threonine kinase activity	27	5.36573	0	0	0	0	0	7	32	1	1
GO Molecular Function	GO:0004694	eukaryotic translation initiation factor 2alpha kinase activity	0	0	0	0	0	0	0	0	4	1	1
GO Molecular Function	GO:0004704	NF-kappaB-inducing kinase activity	7	1.39111	0	0	0	0	0	2	5	1	1
GO Molecular Function	GO:0004705	JUN kinase activity	2	0.397461	0	0	0	0	0	2	3	1	1
GO Molecular Function	GO:0004706	JUN kinase kinase kinase activity	1	0.198731	0	0	0	0	0	1	3	1	1
GO Molecular Function	GO:0004711	ribosomal protein S6 kinase activity	1	0.198731	0	0	0	0	0	1	4	1	1
GO Molecular Function	GO:0004719	protein-L-isoaspartate (D-aspartate) O-methyltransferase activity	4	0.794923	0	0	0	0	0	2	3	1	1
GO Molecular Function	GO:0004720	protein-lysine 6-oxidase activity	3	0.596192	0	0	0	0	0	2	4	1	1
GO Molecular Function	GO:0004724	magnesium-dependent protein serine/threonine phosphatase activity	0	0	0	0	0	0	0	0	1	1	1
GO Molecular Function	GO:0004726	non-membrane spanning protein tyrosine phosphatase activity	1	0.198731	0	0	0	0	0	1	8	1	1
GO Molecular Function	GO:0004727	prenylated protein tyrosine phosphatase activity	0	0	0	0	0	0	0	0	2	1	1
GO Molecular Function	GO:0004728	receptor signaling protein tyrosine phosphatase activity	0	0	0	0	0	0	0	0	1	1	1
GO Molecular Function	GO:0004729	oxygen-dependent protoporphyrinogen oxidase activity	0	0	0	0	0	0	0	0	1	1	1
GO Molecular Function	GO:0004730	pseudouridylate synthase activity	0	0	0	0	0	0	0	0	1	1	1
GO Molecular Function	GO:0004731	purine-nucleoside phosphorylase activity	0	0	0	0	0	0	0	0	1	1	1
GO Molecular Function	GO:0004733	pyridoxamine-phosphate oxidase activity	0	0	0	0	0	0	0	0	1	1	1
GO Molecular Function	GO:0004735	pyrroline-5-carboxylate reductase activity	0	0	0	0	0	0	0	0	5	1	1
GO Molecular Function	GO:0004736	pyruvate carboxylase activity	0	0	0	0	0	0	0	0	1	1	1
GO Molecular Function	GO:0004740	pyruvate dehydrogenase (acetyl-transferring) kinase activity	4	0.794923	0	0	0	0	0	2	4	1	1
GO Molecular Function	GO:0004741	[pyruvate dehydrogenase (lipoamide)] phosphatase activity	0	0	0	0	0	0	0	0	2	1	1
GO Molecular Function	GO:0004742	dihydrolipoyllysine-residue acetyltransferase activity	0	0	0	0	0	0	0	0	1	1	1
GO Molecular Function	GO:0004743	pyruvate kinase activity	6	1.19238	0	0	0	0	0	1	2	1	1
GO Molecular Function	GO:0004744	retinal isomerase activity	1	0.198731	0	0	0	0	0	1	1	1	1
GO Molecular Function	GO:0004745	retinol dehydrogenase activity	0	0	0	0	0	0	0	0	15	1	1
GO Molecular Function	GO:0004747	ribokinase activity	0	0	0	0	0	0	0	0	1	1	1
GO Molecular Function	GO:0004748	ribonucleoside-diphosphate reductase activity, thioredoxin disulfide as acceptor	7	1.39111	0	0	0	0	0	2	3	1	1
GO Molecular Function	GO:0004749	ribose phosphate diphosphokinase activity	0	0	0	0	0	0	0	0	5	1	1
GO Molecular Function	GO:0004751	ribose-5-phosphate isomerase activity	0	0	0	0	0	0	0	0	1	1	1
GO Molecular Function	GO:0004756	selenide, water dikinase activity	1	0.198731	0	0	0	0	0	1	2	1	1
GO Molecular Function	GO:0004757	sepiapterin reductase activity	0	0	0	0	0	0	0	0	1	1	1
GO Molecular Function	GO:0004758	serine C-palmitoyltransferase activity	0	0	0	0	0	0	0	0	5	1	1
GO Molecular Function	GO:0004760	serine-pyruvate transaminase activity	0	0	0	0	0	0	0	0	1	1	1
GO Molecular Function	GO:0004766	spermidine synthase activity	0	0	0	0	0	0	0	0	2	1	1
GO Molecular Function	GO:0004767	sphingomyelin phosphodiesterase activity	8	1.58984	0	0	0	0	0	1	7	1	1
GO Molecular Function	GO:0004768	stearoyl-CoA 9-desaturase activity	1	0.198731	0	0	0	0	0	1	3	1	1
GO Molecular Function	GO:0004769	steroid delta-isomerase activity	3	0.596192	0	0	0	0	0	1	3	1	1
GO Molecular Function	GO:0004771	sterol esterase activity	0	0	0	0	0	0	0	0	2	1	1
GO Molecular Function	GO:0004773	steryl-sulfatase activity	0	0	0	0	0	0	0	0	1	1	1
GO Molecular Function	GO:0004774	succinate-CoA ligase activity	0	0	0	0	0	0	0	0	4	1	1
GO Molecular Function	GO:0004775	succinate-CoA ligase (ADP-forming) activity	0	0	0	0	0	0	0	0	3	1	1
GO Molecular Function	GO:0004776	succinate-CoA ligase (GDP-forming) activity	0	0	0	0	0	0	0	0	2	1	1
GO Molecular Function	GO:0004777	succinate-semialdehyde dehydrogenase (NAD+) activity	0	0	0	0	0	0	0	0	1	1	1
GO Molecular Function	GO:0004778	succinyl-CoA hydrolase activity	0	0	0	0	0	0	0	0	1	1	1
GO Molecular Function	GO:0004781	sulfate adenylyltransferase (ATP) activity	0	0	0	0	0	0	0	0	2	1	1
GO Molecular Function	GO:0004782	sulfinoalanine decarboxylase activity	0	0	0	0	0	0	0	0	1	1	1
GO Molecular Function	GO:0004784	superoxide dismutase activity	6	1.19238	0	0	0	0	0	2	5	1	1
GO Molecular Function	GO:0004788	thiamine diphosphokinase activity	0	0	0	0	0	0	0	0	1	1	1
GO Molecular Function	GO:0004790	thioether S-methyltransferase activity	0	0	0	0	0	0	0	0	1	1	1
GO Molecular Function	GO:0004791	thioredoxin-disulfide reductase activity	0	0	0	0	0	0	0	0	5	1	1
GO Molecular Function	GO:0004792	thiosulfate sulfurtransferase activity	1	0.198731	0	0	0	0	0	1	3	1	1
GO Molecular Function	GO:0004796	thromboxane-A synthase activity	0	0	0	0	0	0	0	0	1	1	1
GO Molecular Function	GO:0004797	thymidine kinase activity	0	0	0	0	0	0	0	0	2	1	1
GO Molecular Function	GO:0004798	thymidylate kinase activity	0	0	0	0	0	0	0	0	2	1	1
GO Molecular Function	GO:0004799	thymidylate synthase activity	0	0	0	0	0	0	0	0	1	1	1
GO Molecular Function	GO:0004800	thyroxine 5'-deiodinase activity	0	0	0	0	0	0	0	0	3	1	1
GO Molecular Function	GO:0004801	sedoheptulose-7-phosphate:D-glyceraldehyde-3-phosphate glyceronetransferase activity	0	0	0	0	0	0	0	0	1	1	1
GO Molecular Function	GO:0004802	transketolase activity	0	0	0	0	0	0	0	0	3	1	1
GO Molecular Function	GO:0004803	transposase activity	0	0	0	0	0	0	0	0	4	1	1
GO Molecular Function	GO:0004806	triglyceride lipase activity	0	0	0	0	0	0	0	0	16	1	1
GO Molecular Function	GO:0004808	tRNA (5-methylaminomethyl-2-thiouridylate)-methyltransferase activity	0	0	0	0	0	0	0	0	1	1	1
GO Molecular Function	GO:0004809	tRNA (guanine-N2-)-methyltransferase activity	1	0.198731	0	0	0	0	0	1	2	1	1
GO Molecular Function	GO:0004810	tRNA adenylyltransferase activity	0	0	0	0	0	0	0	0	1	1	1
GO Molecular Function	GO:0004813	alanine-tRNA ligase activity	0	0	0	0	0	0	0	0	4	1	1
GO Molecular Function	GO:0004814	arginine-tRNA ligase activity	1	0.198731	0	0	0	0	0	1	3	1	1
GO Molecular Function	GO:0004815	aspartate-tRNA ligase activity	0	0	0	0	0	0	0	0	2	1	1
GO Molecular Function	GO:0004816	asparagine-tRNA ligase activity	0	0	0	0	0	0	0	0	2	1	1
GO Molecular Function	GO:0004817	cysteine-tRNA ligase activity	0	0	0	0	0	0	0	0	2	1	1
GO Molecular Function	GO:0004818	glutamate-tRNA ligase activity	2	0.397461	0	0	0	0	0	1	2	1	1
GO Molecular Function	GO:0004820	glycine-tRNA ligase activity	0	0	0	0	0	0	0	0	1	1	1
GO Molecular Function	GO:0004823	leucine-tRNA ligase activity	0	0	0	0	0	0	0	0	2	1	1
GO Molecular Function	GO:0004824	lysine-tRNA ligase activity	0	0	0	0	0	0	0	0	1	1	1
GO Molecular Function	GO:0004825	methionine-tRNA ligase activity	0	0	0	0	0	0	0	0	2	1	1
GO Molecular Function	GO:0004826	phenylalanine-tRNA ligase activity	0	0	0	0	0	0	0	0	5	1	1
GO Molecular Function	GO:0004827	proline-tRNA ligase activity	0	0	0	0	0	0	0	0	2	1	1
GO Molecular Function	GO:0004828	serine-tRNA ligase activity	2	0.397461	0	0	0	0	0	1	4	1	1
GO Molecular Function	GO:0004829	threonine-tRNA ligase activity	1	0.198731	0	0	0	0	0	1	3	1	1
GO Molecular Function	GO:0004831	tyrosine-tRNA ligase activity	2	0.397461	0	0	0	0	0	1	2	1	1
GO Molecular Function	GO:0004832	valine-tRNA ligase activity	2	0.397461	0	0	0	0	0	1	2	1	1
GO Molecular Function	GO:0004833	tryptophan 2,3-dioxygenase activity	0	0	0	0	0	0	0	0	3	1	1
GO Molecular Function	GO:0004835	tubulin-tyrosine ligase activity	0	0	0	0	0	0	0	0	1	1	1
GO Molecular Function	GO:0004838	L-tyrosine:2-oxoglutarate aminotransferase activity	0	0	0	0	0	0	0	0	1	1	1
GO Molecular Function	GO:0004839	ubiquitin activating enzyme activity	0	0	0	0	0	0	0	0	2	1	1
GO Molecular Function	GO:0004844	uracil DNA N-glycosylase activity	3	0.596192	0	0	0	0	0	1	4	1	1
GO Molecular Function	GO:0004849	uridine kinase activity	0	0	0	0	0	0	0	0	5	1	1
GO Molecular Function	GO:0004850	uridine phosphorylase activity	0	0	0	0	0	0	0	0	2	1	1
GO Molecular Function	GO:0004852	uroporphyrinogen-III synthase activity	0	0	0	0	0	0	0	0	1	1	1
GO Molecular Function	GO:0004853	uroporphyrinogen decarboxylase activity	3	0.596192	0	0	0	0	0	1	1	1	1
GO Molecular Function	GO:0004854	xanthine dehydrogenase activity	0	0	0	0	0	0	0	0	2	1	1
GO Molecular Function	GO:0004855	xanthine oxidase activity	0	0	0	0	0	0	0	0	1	1	1
GO Molecular Function	GO:0004862	cAMP-dependent protein kinase inhibitor activity	0	0	0	0	0	0	0	0	8	1	1
GO Molecular Function	GO:0004865	protein serine/threonine phosphatase inhibitor activity	1	0.198731	0	0	0	0	0	1	5	1	1
GO Molecular Function	GO:0004874	aryl hydrocarbon receptor activity	0	0	0	0	0	0	0	0	1	1	1
GO Molecular Function	GO:0004875	complement receptor activity	0	0	0	0	0	0	0	0	4	1	1
GO Molecular Function	GO:0004876	complement component C3a receptor activity	0	0	0	0	0	0	0	0	1	1	1
GO Molecular Function	GO:0004877	complement component C3b receptor activity	0	0	0	0	0	0	0	0	1	1	1
GO Molecular Function	GO:0004878	complement component C5a receptor activity	0	0	0	0	0	0	0	0	1	1	1
GO Molecular Function	GO:0004882	androgen receptor activity	0	0	0	0	0	0	0	0	3	1	1
GO Molecular Function	GO:0004883	glucocorticoid receptor activity	0	0	0	0	0	0	0	0	1	1	1
GO Molecular Function	GO:0004887	thyroid hormone receptor activity	21	4.17334	0	0	0	0	0	2	9	1	1
GO Molecular Function	GO:0004889	acetylcholine-activated cation-selective channel activity	10	1.98731	0	0	0	0	0	3	16	1	1
GO Molecular Function	GO:0004900	erythropoietin receptor activity	0	0	0	0	0	0	0	0	1	1	1
GO Molecular Function	GO:0004903	growth hormone receptor activity	0	0	0	0	0	0	0	0	1	1	1
GO Molecular Function	GO:0004904	interferon receptor activity	0	0	0	0	0	0	0	0	5	1	1
GO Molecular Function	GO:0004905	type I interferon receptor activity	0	0	0	0	0	0	0	0	2	1	1
GO Molecular Function	GO:0004906	interferon-gamma receptor activity	0	0	0	0	0	0	0	0	2	1	1
GO Molecular Function	GO:0004908	interleukin-1 receptor activity	0	0	0	0	0	0	0	0	7	1	1
GO Molecular Function	GO:0004909	interleukin-1, Type I, activating receptor activity	0	0	0	0	0	0	0	0	2	1	1
GO Molecular Function	GO:0004910	interleukin-1, Type II, blocking receptor activity	0	0	0	0	0	0	0	0	2	1	1
GO Molecular Function	GO:0004911	interleukin-2 receptor activity	1	0.198731	0	0	0	0	0	1	3	1	1
GO Molecular Function	GO:0004912	interleukin-3 receptor activity	0	0	0	0	0	0	0	0	2	1	1
GO Molecular Function	GO:0004913	interleukin-4 receptor activity	1	0.198731	0	0	0	0	0	1	2	1	1
GO Molecular Function	GO:0004914	interleukin-5 receptor activity	0	0	0	0	0	0	0	0	2	1	1
GO Molecular Function	GO:0004915	interleukin-6 receptor activity	0	0	0	0	0	0	0	0	2	1	1
GO Molecular Function	GO:0004917	interleukin-7 receptor activity	1	0.198731	0	0	0	0	0	1	2	1	1
GO Molecular Function	GO:0004918	interleukin-8 receptor activity	0	0	0	0	0	0	0	0	2	1	1
GO Molecular Function	GO:0004919	interleukin-9 receptor activity	0	0	0	0	0	0	0	0	1	1	1
GO Molecular Function	GO:0004920	interleukin-10 receptor activity	0	0	0	0	0	0	0	0	2	1	1
GO Molecular Function	GO:0004921	interleukin-11 receptor activity	0	0	0	0	0	0	0	0	1	1	1
GO Molecular Function	GO:0004923	leukemia inhibitory factor receptor activity	0	0	0	0	0	0	0	0	2	1	1
GO Molecular Function	GO:0004924	oncostatin-M receptor activity	0	0	0	0	0	0	0	0	3	1	1
GO Molecular Function	GO:0004925	prolactin receptor activity	0	0	0	0	0	0	0	0	1	1	1
GO Molecular Function	GO:0004931	extracellular ATP-gated cation channel activity	0	0	0	0	0	0	0	0	7	1	1
GO Molecular Function	GO:0004936	alpha-adrenergic receptor activity	0	0	0	0	0	0	0	0	6	1	1
GO Molecular Function	GO:0004937	alpha1-adrenergic receptor activity	0	0	0	0	0	0	0	0	3	1	1
GO Molecular Function	GO:0004938	alpha2-adrenergic receptor activity	0	0	0	0	0	0	0	0	3	1	1
GO Molecular Function	GO:0004941	beta2-adrenergic receptor activity	3	0.596192	0	0	0	0	0	1	1	1	1
GO Molecular Function	GO:0004942	anaphylatoxin receptor activity	0	0	0	0	0	0	0	0	3	1	1
GO Molecular Function	GO:0004943	C3a anaphylatoxin receptor activity	0	0	0	0	0	0	0	0	1	1	1
GO Molecular Function	GO:0004944	C5a anaphylatoxin receptor activity	0	0	0	0	0	0	0	0	2	1	1
GO Molecular Function	GO:0004945	angiotensin type II receptor activity	0	0	0	0	0	0	0	0	5	1	1
GO Molecular Function	GO:0004947	bradykinin receptor activity	0	0	0	0	0	0	0	0	2	1	1
GO Molecular Function	GO:0004948	calcitonin receptor activity	0	0	0	0	0	0	0	0	4	1	1
GO Molecular Function	GO:0004951	cholecystokinin receptor activity	0	0	0	0	0	0	0	0	2	1	1
GO Molecular Function	GO:0004952	dopamine neurotransmitter receptor activity	2	0.397461	0	0	0	0	0	2	5	1	1
GO Molecular Function	GO:0004956	prostaglandin D receptor activity	0	0	0	0	0	0	0	0	2	1	1
GO Molecular Function	GO:0004957	prostaglandin E receptor activity	6	1.19238	0	0	0	0	0	2	5	1	1
GO Molecular Function	GO:0004958	prostaglandin F receptor activity	0	0	0	0	0	0	0	0	4	1	1
GO Molecular Function	GO:0004961	thromboxane A2 receptor activity	0	0	0	0	0	0	0	0	1	1	1
GO Molecular Function	GO:0004963	follicle-stimulating hormone receptor activity	0	0	0	0	0	0	0	0	1	1	1
GO Molecular Function	GO:0004964	luteinizing hormone receptor activity	0	0	0	0	0	0	0	0	1	1	1
GO Molecular Function	GO:0004965	G-protein coupled GABA receptor activity	0	0	0	0	0	0	0	0	3	1	1
GO Molecular Function	GO:0004966	galanin receptor activity	0	0	0	0	0	0	0	0	3	1	1
GO Molecular Function	GO:0004967	glucagon receptor activity	1	0.198731	0	0	0	0	0	1	3	1	1
GO Molecular Function	GO:0004968	gonadotropin-releasing hormone receptor activity	0	0	0	0	0	0	0	0	1	1	1
GO Molecular Function	GO:0004974	leukotriene receptor activity	0	0	0	0	0	0	0	0	4	1	1
GO Molecular Function	GO:0004977	melanocortin receptor activity	0	0	0	0	0	0	0	0	6	1	1
GO Molecular Function	GO:0004978	corticotropin receptor activity	0	0	0	0	0	0	0	0	1	1	1
GO Molecular Function	GO:0004979	beta-endorphin receptor activity	0	0	0	0	0	0	0	0	1	1	1
GO Molecular Function	GO:0004980	melanocyte-stimulating hormone receptor activity	0	0	0	0	0	0	0	0	3	1	1
GO Molecular Function	GO:0004982	N-formyl peptide receptor activity	0	0	0	0	0	0	0	0	9	1	1
GO Molecular Function	GO:0004983	neuropeptide Y receptor activity	0	0	0	0	0	0	0	0	9	1	1
GO Molecular Function	GO:0004985	opioid receptor activity	3	0.596192	0	0	0	0	0	2	9	1	1
GO Molecular Function	GO:0004990	oxytocin receptor activity	2	0.397461	0	0	0	0	0	1	1	1	1
GO Molecular Function	GO:0004991	parathyroid hormone receptor activity	1	0.198731	0	0	0	0	0	1	2	1	1
GO Molecular Function	GO:0004992	platelet activating factor receptor activity	4	0.794923	0	0	0	0	0	1	3	1	1
GO Molecular Function	GO:0004994	somatostatin receptor activity	1	0.198731	0	0	0	0	0	1	5	1	1
GO Molecular Function	GO:0004995	tachykinin receptor activity	0	0	0	0	0	0	0	0	3	1	1
GO Molecular Function	GO:0004997	thyrotropin-releasing hormone receptor activity	0	0	0	0	0	0	0	0	1	1	1
GO Molecular Function	GO:0004998	transferrin receptor activity	0	0	0	0	0	0	0	0	2	1	1
GO Molecular Function	GO:0004999	vasoactive intestinal polypeptide receptor activity	2	0.397461	0	0	0	0	0	1	3	1	1
GO Molecular Function	GO:0005000	vasopressin receptor activity	2	0.397461	0	0	0	0	0	1	7	1	1
GO Molecular Function	GO:0005006	epidermal growth factor-activated receptor activity	1	0.198731	0	0	0	0	0	1	3	1	1
GO Molecular Function	GO:0005008	hepatocyte growth factor-activated receptor activity	0	0	0	0	0	0	0	0	1	1	1
GO Molecular Function	GO:0005009	insulin-activated receptor activity	0	0	0	0	0	0	0	0	1	1	1
GO Molecular Function	GO:0005010	insulin-like growth factor-activated receptor activity	0	0	0	0	0	0	0	0	3	1	1
GO Molecular Function	GO:0005011	macrophage colony-stimulating factor receptor activity	0	0	0	0	0	0	0	0	2	1	1
GO Molecular Function	GO:0005017	platelet-derived growth factor-activated receptor activity	4	0.794923	0	0	0	0	0	1	4	1	1
GO Molecular Function	GO:0005018	platelet-derived growth factor alpha-receptor activity	0	0	0	0	0	0	0	0	1	1	1
GO Molecular Function	GO:0005019	platelet-derived growth factor beta-receptor activity	4	0.794923	0	0	0	0	0	1	3	1	1
GO Molecular Function	GO:0005021	vascular endothelial growth factor-activated receptor activity	4	0.794923	0	0	0	0	0	3	7	1	1
GO Molecular Function	GO:0005026	transforming growth factor beta receptor activity, type II	1	0.198731	0	0	0	0	0	1	2	1	1
GO Molecular Function	GO:0005031	tumor necrosis factor-activated receptor activity	4	0.794923	0	0	0	0	0	1	11	1	1
GO Molecular Function	GO:0005034	osmosensor activity	1	0.198731	0	0	0	0	0	1	1	1	1
GO Molecular Function	GO:0005035	death receptor activity	4	0.794923	0	0	0	0	0	1	13	1	1
GO Molecular Function	GO:0005044	scavenger receptor activity	7	1.39111	0	0	0	0	0	5	47	1	1
GO Molecular Function	GO:0005046	KDEL sequence binding	0	0	0	0	0	0	0	0	2	1	1
GO Molecular Function	GO:0005047	signal recognition particle binding	1	0.198731	0	0	0	0	0	1	4	1	1
GO Molecular Function	GO:0005049	nuclear export signal receptor activity	4	0.794923	0	0	0	0	0	2	3	1	1
GO Molecular Function	GO:0005053	peroxisome matrix targeting signal-2 binding	0	0	0	0	0	0	0	0	1	1	1
GO Molecular Function	GO:0005055	laminin receptor activity	0	0	0	0	0	0	0	0	3	1	1
GO Molecular Function	GO:0005068	transmembrane receptor protein tyrosine kinase adaptor activity	3	0.596192	0	0	0	0	0	1	9	1	1
GO Molecular Function	GO:0005078	MAP-kinase scaffold activity	1	0.198731	0	0	0	0	0	1	6	1	1
GO Molecular Function	GO:0005087	Ran guanyl-nucleotide exchange factor activity	0	0	0	0	0	0	0	0	5	1	1
GO Molecular Function	GO:0005092	GDP-dissociation inhibitor activity	0	0	0	0	0	0	0	0	12	1	1
GO Molecular Function	GO:0005093	Rab GDP-dissociation inhibitor activity	0	0	0	0	0	0	0	0	2	1	1
GO Molecular Function	GO:0005094	Rho GDP-dissociation inhibitor activity	0	0	0	0	0	0	0	0	3	1	1
GO Molecular Function	GO:0005098	Ran GTPase activator activity	0	0	0	0	0	0	0	0	1	1	1
GO Molecular Function	GO:0005114	type II transforming growth factor beta receptor binding	5	0.993653	0	0	0	0	0	3	7	1	1
GO Molecular Function	GO:0005121	Toll binding	0	0	0	0	0	0	0	0	1	1	1
GO Molecular Function	GO:0005123	death receptor binding	7	1.39111	0	0	0	0	0	3	11	1	1
GO Molecular Function	GO:0005124	scavenger receptor binding	0	0	0	0	0	0	0	0	1	1	1
GO Molecular Function	GO:0005127	ciliary neurotrophic factor receptor binding	2	0.397461	0	0	0	0	0	1	5	1	1
GO Molecular Function	GO:0005128	erythropoietin receptor binding	2	0.397461	0	0	0	0	0	1	2	1	1
GO Molecular Function	GO:0005129	granulocyte macrophage colony-stimulating factor receptor binding	0	0	0	0	0	0	0	0	1	1	1
GO Molecular Function	GO:0005130	granulocyte colony-stimulating factor receptor binding	1	0.198731	0	0	0	0	0	1	1	1	1
GO Molecular Function	GO:0005131	growth hormone receptor binding	0	0	0	0	0	0	0	0	5	1	1
GO Molecular Function	GO:0005132	interferon-alpha/beta receptor binding	0	0	0	0	0	0	0	0	8	1	1
GO Molecular Function	GO:0005133	interferon-gamma receptor binding	0	0	0	0	0	0	0	0	2	1	1
GO Molecular Function	GO:0005134	interleukin-2 receptor binding	3	0.596192	0	0	0	0	0	1	5	1	1
GO Molecular Function	GO:0005135	interleukin-3 receptor binding	2	0.397461	0	0	0	0	0	1	2	1	1
GO Molecular Function	GO:0005136	interleukin-4 receptor binding	0	0	0	0	0	0	0	0	1	1	1
GO Molecular Function	GO:0005137	interleukin-5 receptor binding	0	0	0	0	0	0	0	0	2	1	1
GO Molecular Function	GO:0005138	interleukin-6 receptor binding	2	0.397461	0	0	0	0	0	1	6	1	1
GO Molecular Function	GO:0005139	interleukin-7 receptor binding	0	0	0	0	0	0	0	0	1	1	1
GO Molecular Function	GO:0005140	interleukin-9 receptor binding	0	0	0	0	0	0	0	0	1	1	1
GO Molecular Function	GO:0005141	interleukin-10 receptor binding	0	0	0	0	0	0	0	0	1	1	1
GO Molecular Function	GO:0005142	interleukin-11 receptor binding	0	0	0	0	0	0	0	0	1	1	1
GO Molecular Function	GO:0005143	interleukin-12 receptor binding	0	0	0	0	0	0	0	0	5	1	1
GO Molecular Function	GO:0005144	interleukin-13 receptor binding	0	0	0	0	0	0	0	0	1	1	1
GO Molecular Function	GO:0005146	leukemia inhibitory factor receptor binding	0	0	0	0	0	0	0	0	2	1	1
GO Molecular Function	GO:0005147	oncostatin-M receptor binding	0	0	0	0	0	0	0	0	1	1	1
GO Molecular Function	GO:0005149	interleukin-1 receptor binding	6	1.19238	0	0	0	0	0	1	17	1	1
GO Molecular Function	GO:0005150	interleukin-1, Type I receptor binding	0	0	0	0	0	0	0	0	2	1	1
GO Molecular Function	GO:0005151	interleukin-1, Type II receptor binding	0	0	0	0	0	0	0	0	2	1	1
GO Molecular Function	GO:0005152	interleukin-1 receptor antagonist activity	0	0	0	0	0	0	0	0	3	1	1
GO Molecular Function	GO:0005153	interleukin-8 receptor binding	0	0	0	0	0	0	0	0	2	1	1
GO Molecular Function	GO:0005157	macrophage colony-stimulating factor receptor binding	0	0	0	0	0	0	0	0	2	1	1
GO Molecular Function	GO:0005163	nerve growth factor receptor binding	0	0	0	0	0	0	0	0	1	1	1
GO Molecular Function	GO:0005166	neurotrophin p75 receptor binding	0	0	0	0	0	0	0	0	1	1	1
GO Molecular Function	GO:0005168	neurotrophin TRKA receptor binding	0	0	0	0	0	0	0	0	5	1	1
GO Molecular Function	GO:0005171	hepatocyte growth factor receptor binding	0	0	0	0	0	0	0	0	1	1	1
GO Molecular Function	GO:0005173	stem cell factor receptor binding	12	2.38477	0	0	0	0	0	3	3	1	1
GO Molecular Function	GO:0005175	CD27 receptor binding	0	0	0	0	0	0	0	0	1	1	1
GO Molecular Function	GO:0005176	ErbB-2 class receptor binding	0	0	0	0	0	0	0	0	4	1	1
GO Molecular Function	GO:0005183	gonadotropin hormone-releasing hormone activity	0	0	0	0	0	0	0	0	1	1	1
GO Molecular Function	GO:0005184	neuropeptide hormone activity	11	2.18604	0	0	0	0	0	4	22	1	1
GO Molecular Function	GO:0005185	neurohypophyseal hormone activity	0	0	0	0	0	0	0	0	2	1	1
GO Molecular Function	GO:0005199	structural constituent of cell wall	0	0	0	0	0	0	0	0	1	1	1
GO Molecular Function	GO:0005212	structural constituent of eye lens	1	0.198731	0	0	0	0	0	1	19	1	1
GO Molecular Function	GO:0005217	intracellular ligand-gated ion channel activity	3	0.596192	0	0	0	0	0	3	21	1	1
GO Molecular Function	GO:0005218	intracellular ligand-gated calcium channel activity	3	0.596192	0	0	0	0	0	3	10	1	1
GO Molecular Function	GO:0005219	ryanodine-sensitive calcium-release channel activity	1	0.198731	0	0	0	0	0	1	5	1	1
GO Molecular Function	GO:0005220	inositol 1,4,5-trisphosphate-sensitive calcium-release channel activity	1	0.198731	0	0	0	0	0	1	3	1	1
GO Molecular Function	GO:0005221	intracellular cyclic nucleotide activated cation channel activity	0	0	0	0	0	0	0	0	9	1	1
GO Molecular Function	GO:0005222	intracellular cAMP activated cation channel activity	0	0	0	0	0	0	0	0	7	1	1
GO Molecular Function	GO:0005223	intracellular cGMP activated cation channel activity	0	0	0	0	0	0	0	0	7	1	1
GO Molecular Function	GO:0005224	ATP-binding and phosphorylation-dependent chloride channel activity	0	0	0	0	0	0	0	0	1	1	1
GO Molecular Function	GO:0005229	intracellular calcium activated chloride channel activity	0	0	0	0	0	0	0	0	4	1	1
GO Molecular Function	GO:0005232	serotonin-activated cation-selective channel activity	1	0.198731	0	0	0	0	0	2	2	1	1
GO Molecular Function	GO:0005250	A-type (transient outward) potassium channel activity	5	0.993653	0	0	0	0	0	2	3	1	1
GO Molecular Function	GO:0005252	open rectifier potassium channel activity	2	0.397461	0	0	0	0	0	1	1	1	1
GO Molecular Function	GO:0005260	channel-conductance-controlling ATPase activity	0	0	0	0	0	0	0	0	1	1	1
GO Molecular Function	GO:0005275	amine transmembrane transporter activity	0	0	0	0	0	0	0	0	3	1	1
GO Molecular Function	GO:0005277	acetylcholine transmembrane transporter activity	0	0	0	0	0	0	0	0	2	1	1
GO Molecular Function	GO:0005289	high affinity arginine transmembrane transporter activity	4	0.794923	0	0	0	0	0	1	1	1	1
GO Molecular Function	GO:0005290	L-histidine transmembrane transporter activity	0	0	0	0	0	0	0	0	3	1	1
GO Molecular Function	GO:0005298	proline:sodium symporter activity	0	0	0	0	0	0	0	0	1	1	1
GO Molecular Function	GO:0005302	L-tyrosine transmembrane transporter activity	0	0	0	0	0	0	0	0	1	1	1
GO Molecular Function	GO:0005307	choline:sodium symporter activity	0	0	0	0	0	0	0	0	1	1	1
GO Molecular Function	GO:0005309	creatine:sodium symporter activity	0	0	0	0	0	0	0	0	1	1	1
GO Molecular Function	GO:0005315	inorganic phosphate transmembrane transporter activity	2	0.397461	0	0	0	0	0	1	4	1	1
GO Molecular Function	GO:0005316	high affinity inorganic phosphate:sodium symporter activity	2	0.397461	0	0	0	0	0	1	1	1	1
GO Molecular Function	GO:0005324	long-chain fatty acid transporter activity	0	0	0	0	0	0	0	0	4	1	1
GO Molecular Function	GO:0005325	peroxisomal fatty-acyl-CoA transporter activity	0	0	0	0	0	0	0	0	1	1	1
GO Molecular Function	GO:0005329	dopamine transmembrane transporter activity	0	0	0	0	0	0	0	0	3	1	1
GO Molecular Function	GO:0005330	dopamine:sodium symporter activity	0	0	0	0	0	0	0	0	1	1	1
GO Molecular Function	GO:0005332	gamma-aminobutyric acid:sodium symporter activity	2	0.397461	0	0	0	0	0	2	4	1	1
GO Molecular Function	GO:0005333	norepinephrine transmembrane transporter activity	0	0	0	0	0	0	0	0	2	1	1
GO Molecular Function	GO:0005334	norepinephrine:sodium symporter activity	0	0	0	0	0	0	0	0	1	1	1
GO Molecular Function	GO:0005335	serotonin:sodium symporter activity	0	0	0	0	0	0	0	0	1	1	1
GO Molecular Function	GO:0005337	nucleoside transmembrane transporter activity	0	0	0	0	0	0	0	0	12	1	1
GO Molecular Function	GO:0005344	oxygen transporter activity	1	0.198731	0	0	0	0	0	1	14	1	1
GO Molecular Function	GO:0005345	purine nucleobase transmembrane transporter activity	0	0	0	0	0	0	0	0	4	1	1
GO Molecular Function	GO:0005346	purine ribonucleotide transmembrane transporter activity	0	0	0	0	0	0	0	0	4	1	1
GO Molecular Function	GO:0005347	ATP transmembrane transporter activity	0	0	0	0	0	0	0	0	3	1	1
GO Molecular Function	GO:0005350	pyrimidine nucleobase transmembrane transporter activity	0	0	0	0	0	0	0	0	2	1	1
GO Molecular Function	GO:0005351	sugar:hydrogen symporter activity	0	0	0	0	0	0	0	0	8	1	1
GO Molecular Function	GO:0005353	fructose transmembrane transporter activity	0	0	0	0	0	0	0	0	1	1	1
GO Molecular Function	GO:0005355	glucose transmembrane transporter activity	10	1.98731	0	0	0	0	0	2	12	1	1
GO Molecular Function	GO:0005362	low-affinity glucose:sodium symporter activity	0	0	0	0	0	0	0	0	1	1	1
GO Molecular Function	GO:0005367	myo-inositol:sodium symporter activity	1	0.198731	0	0	0	0	0	1	1	1	1
GO Molecular Function	GO:0005369	taurine:sodium symporter activity	1	0.198731	0	0	0	0	0	1	1	1	1
GO Molecular Function	GO:0005372	water transmembrane transporter activity	0	0	0	0	0	0	0	0	11	1	1
[truncated: 63,536 more rows]
