# Supplementary material for: Hibernation slows epigenetic aging in yellow-bellied marmots
Source: Research Square preprint supplement (doi:10.21203/rs.3.rs-526409/v1), 2021-05-21
Supplement: Supplementary file 1 [file 65ed55b7fe0e88c6f31cf667.doc]

Figure S1. Visualization of the simulated patterns of epigenetic aging. We simulated two traits: (linear) a trait that increases linearly with age independently of the season; and (seasonal) a trait that increases during the summer but not during the winter.


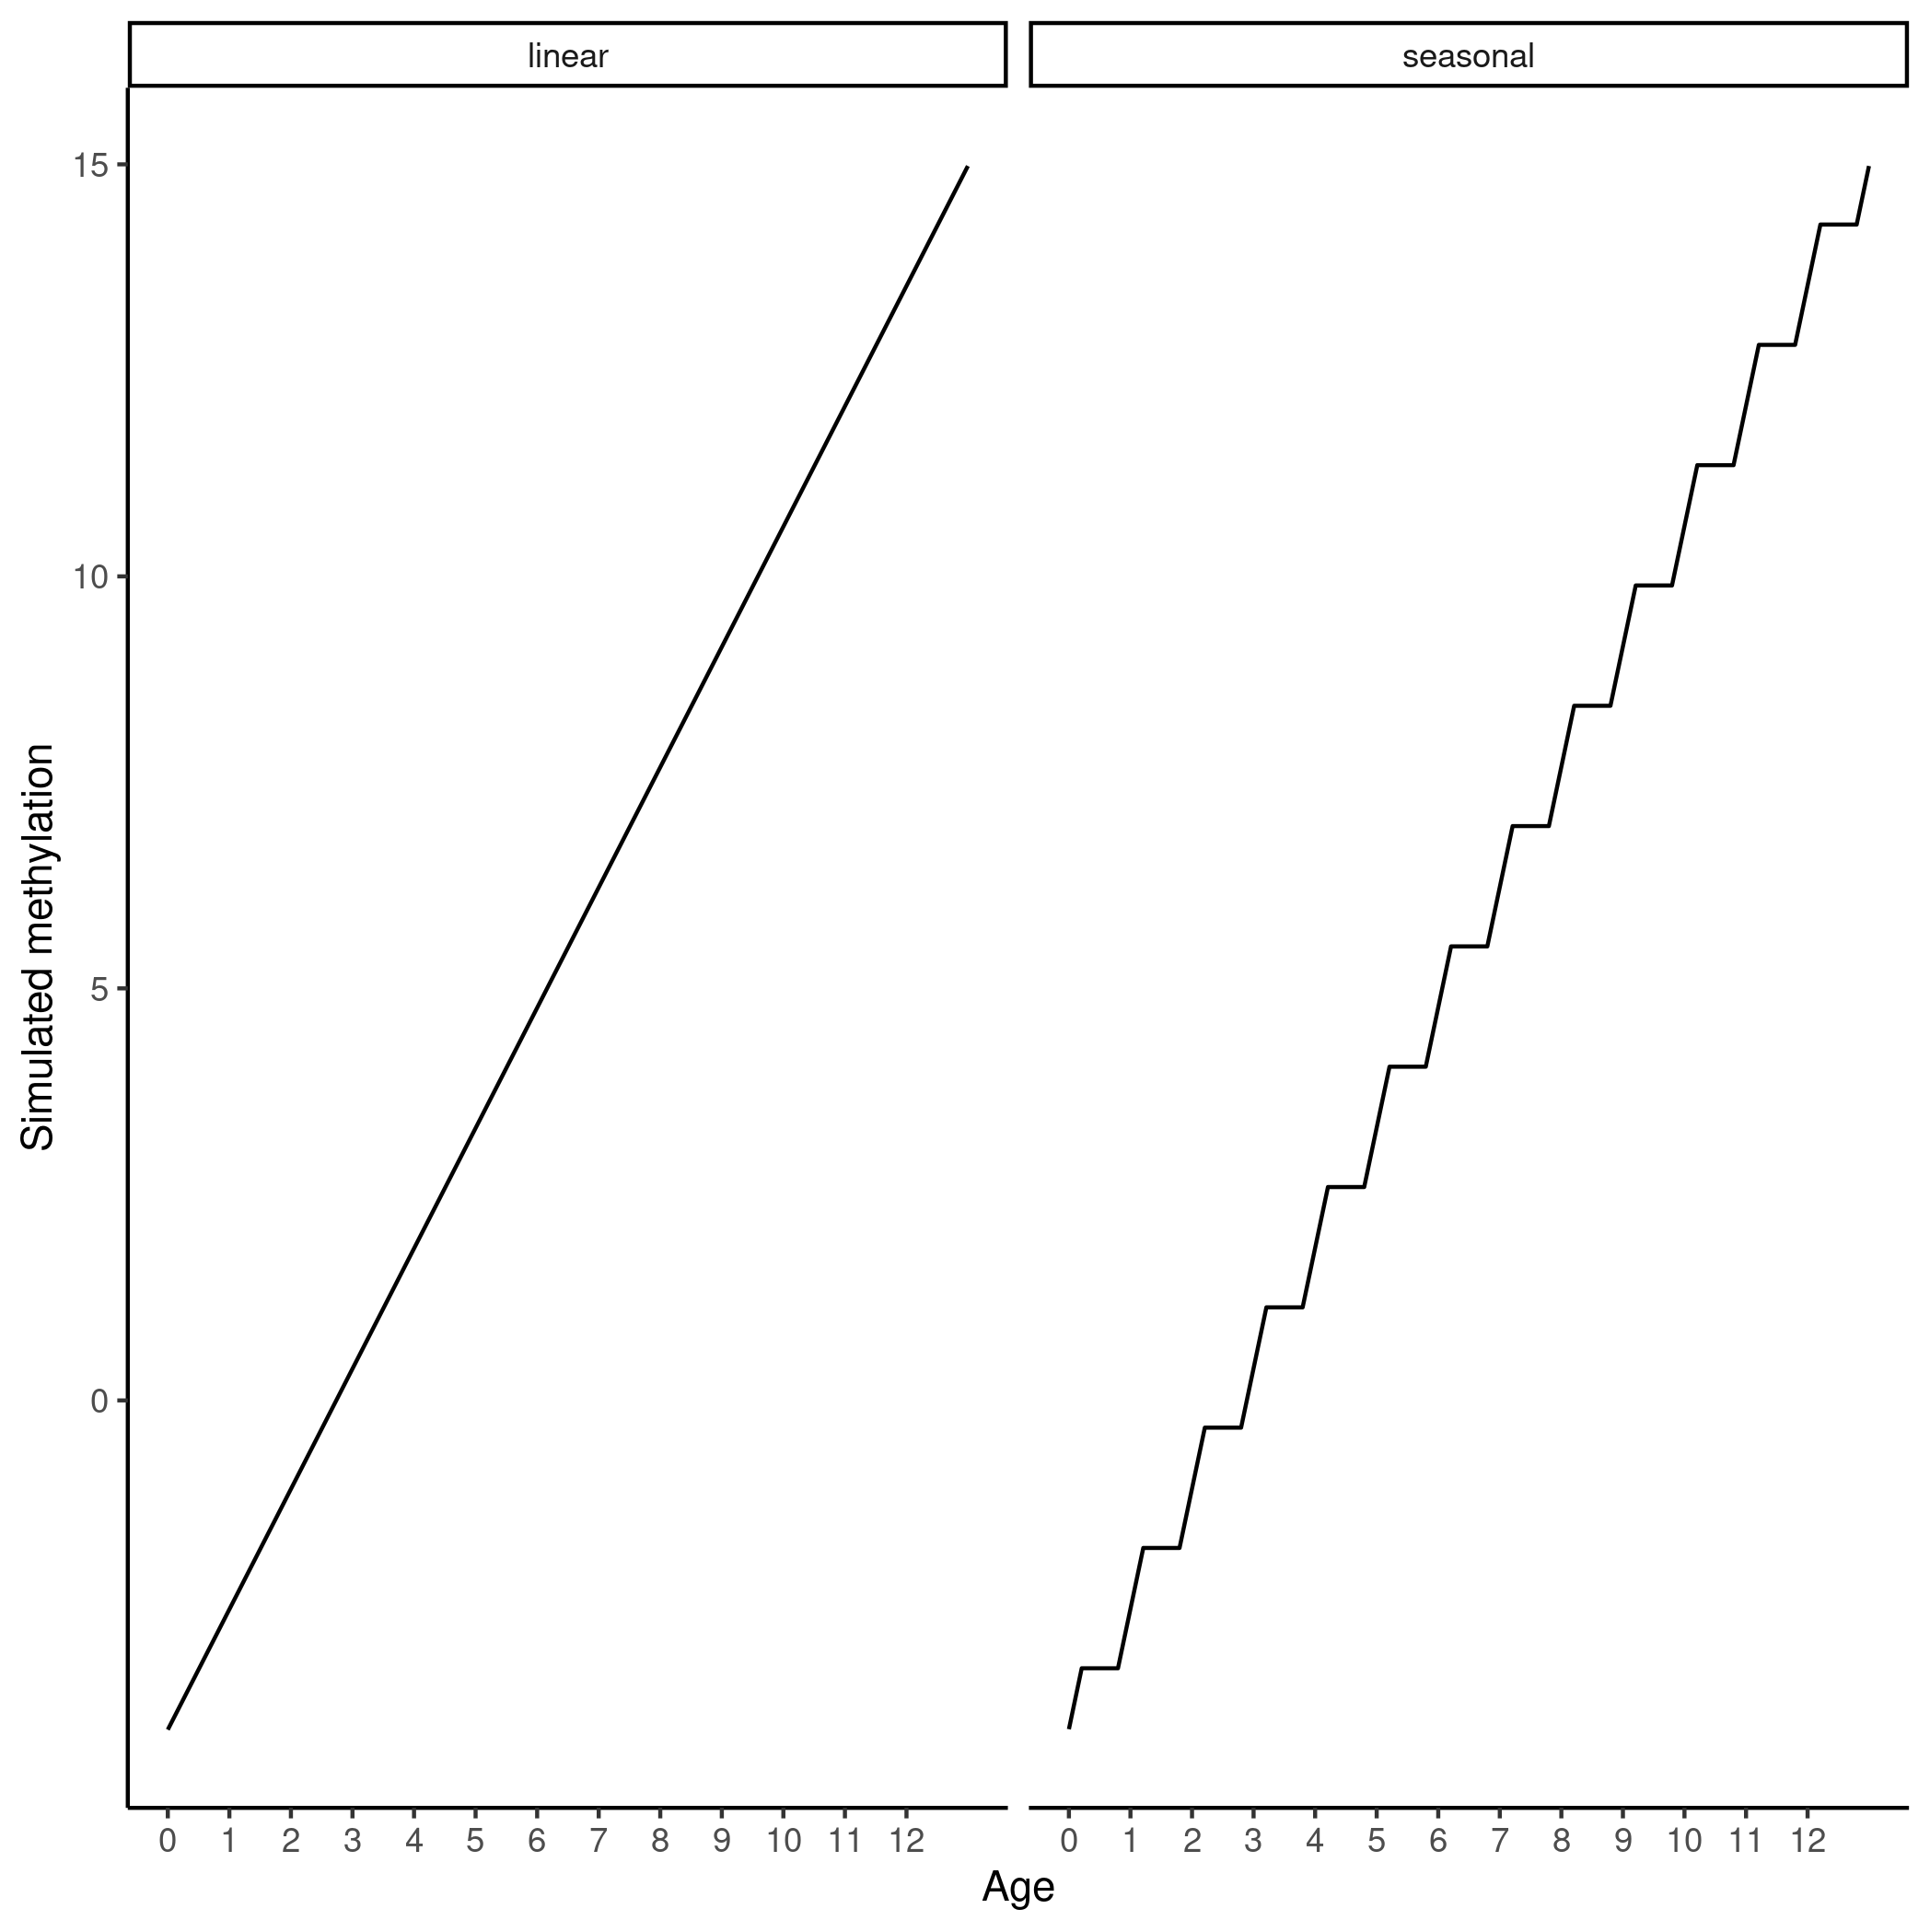


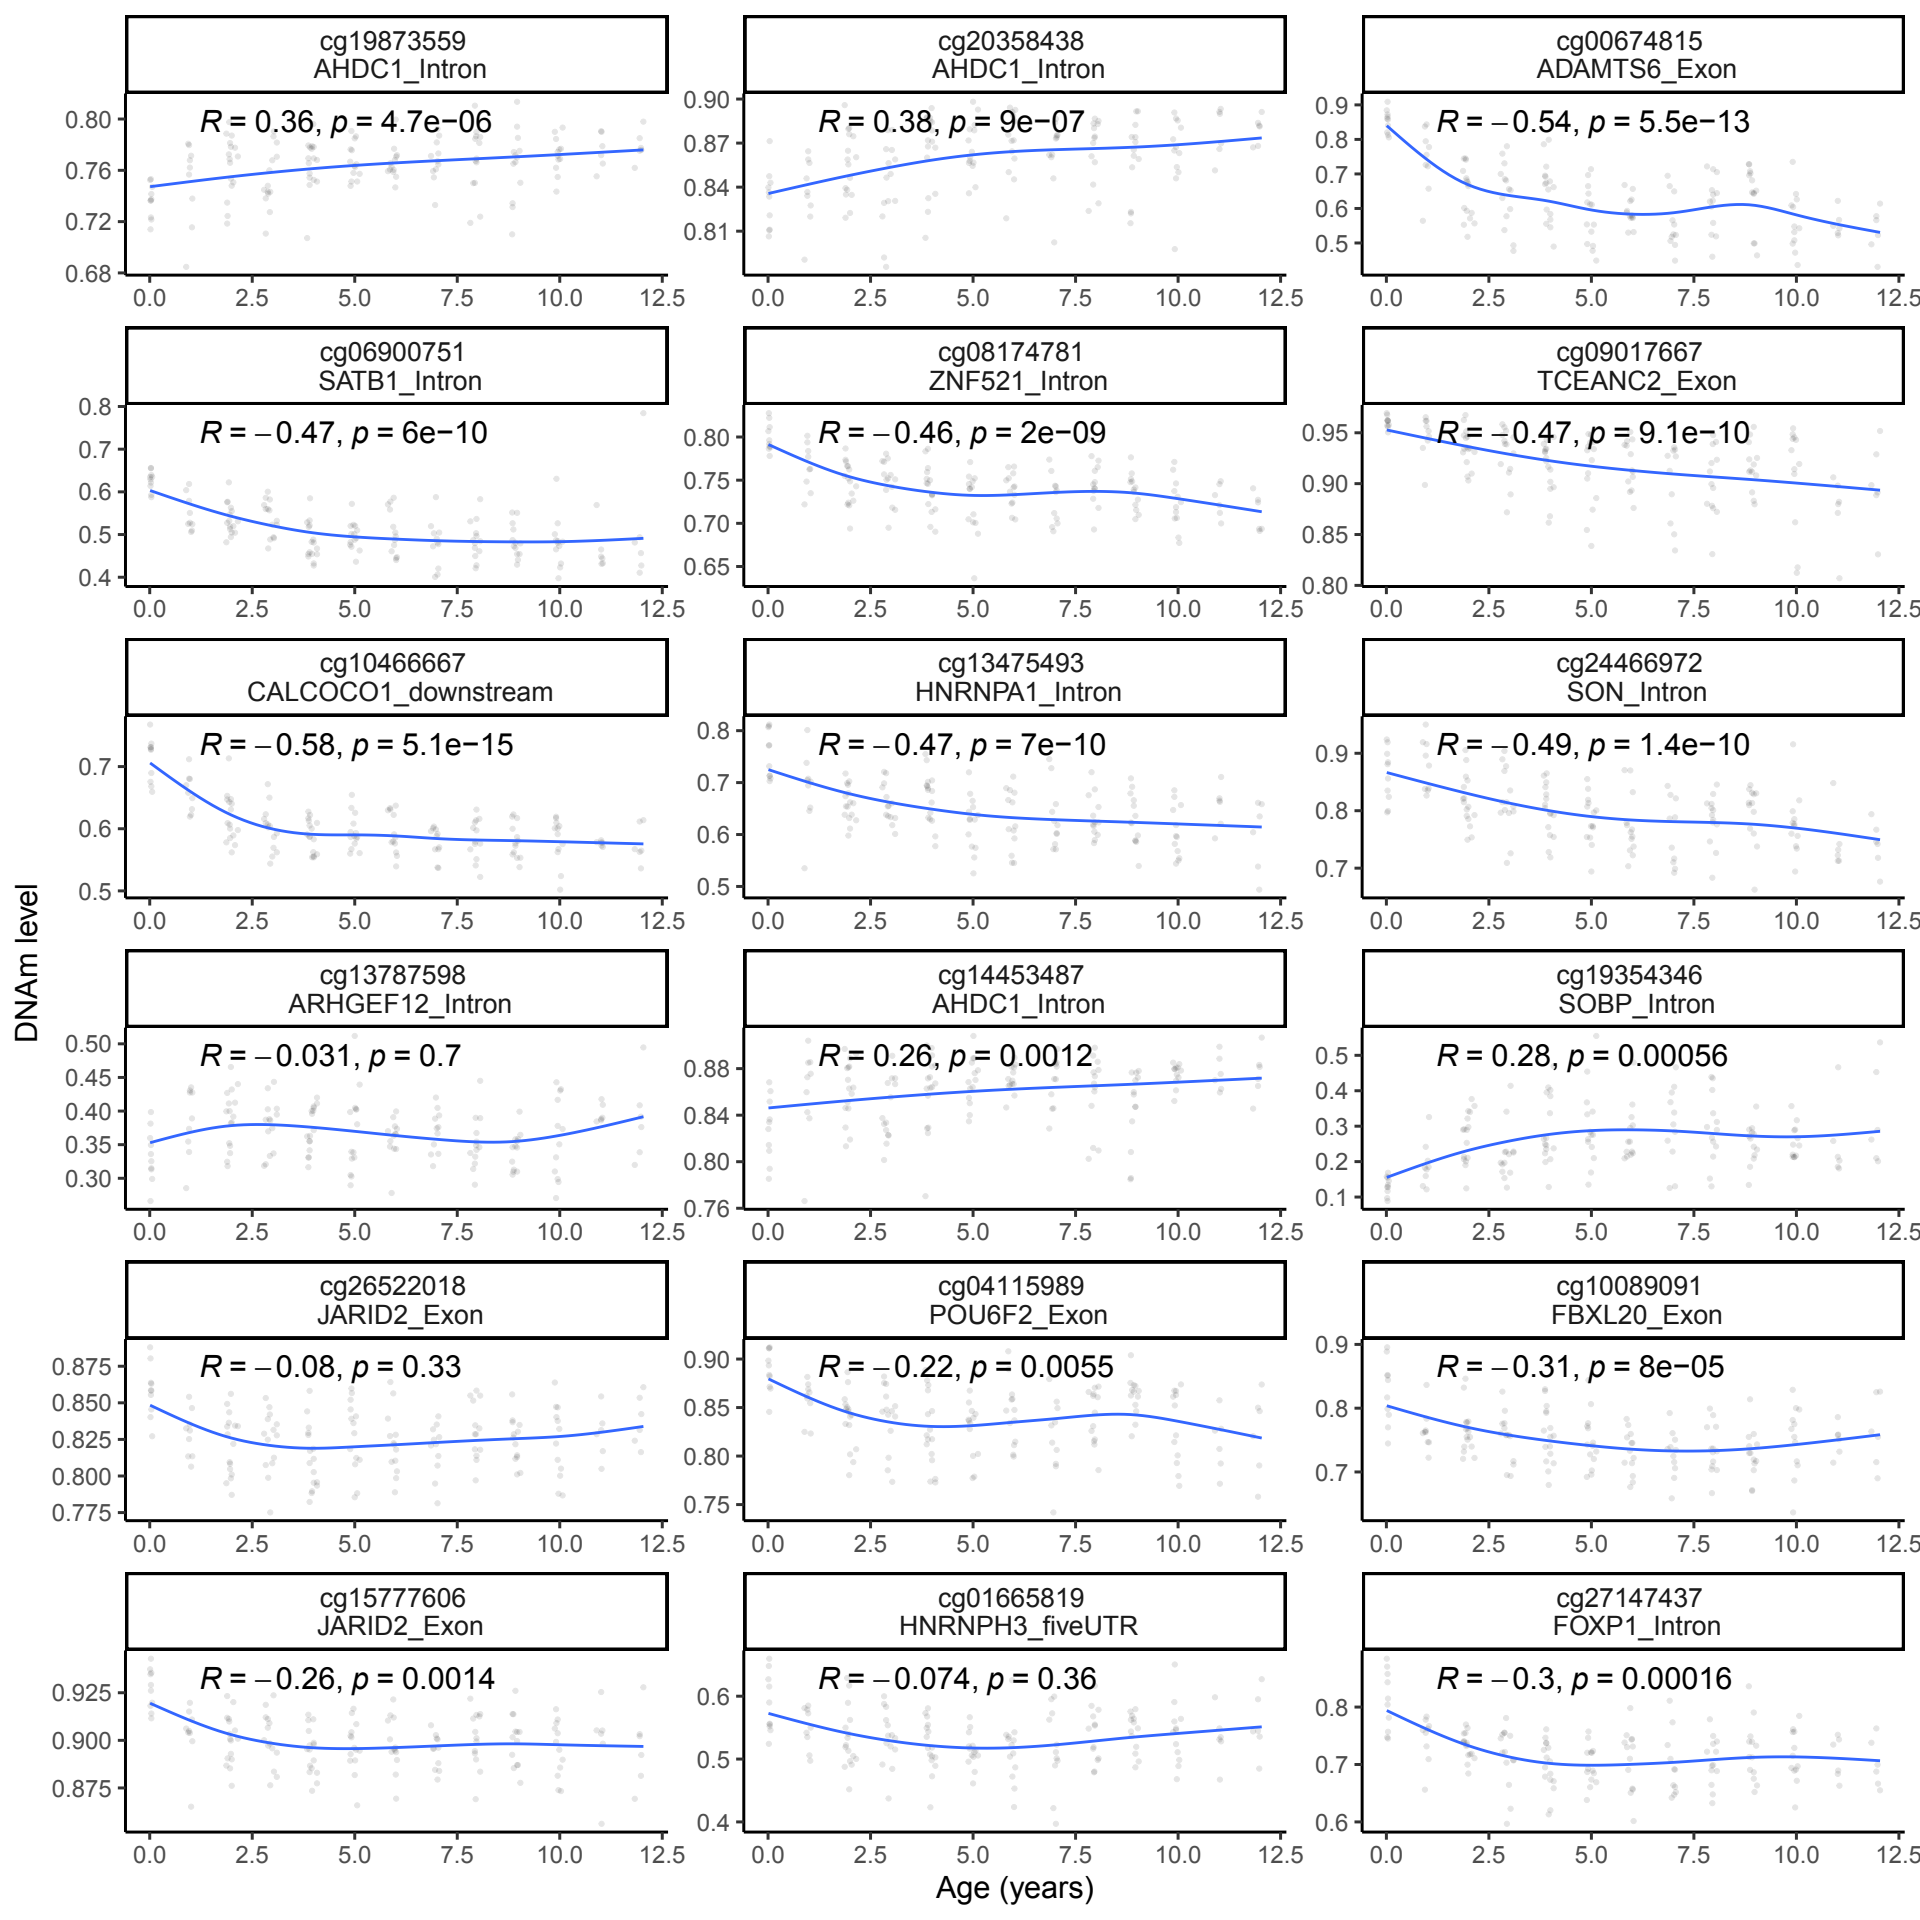


Figure S2. Examples of CpG sites where methylation levels are non-linearly related with chronological age. Each plot includes the site identification in the Mammalian array and its location relative to the closest transcriptional start site. The CpG sites coordinates were estimated based on the alignment of Mammalian array probes to yellow-bellied marmot (*Marmota flaviventer*) genome assembly. Trend lines represent the GAM smooth function. R and p-values are based on the Pearson correlation of the CpGs’ methylation level and age in marmots.


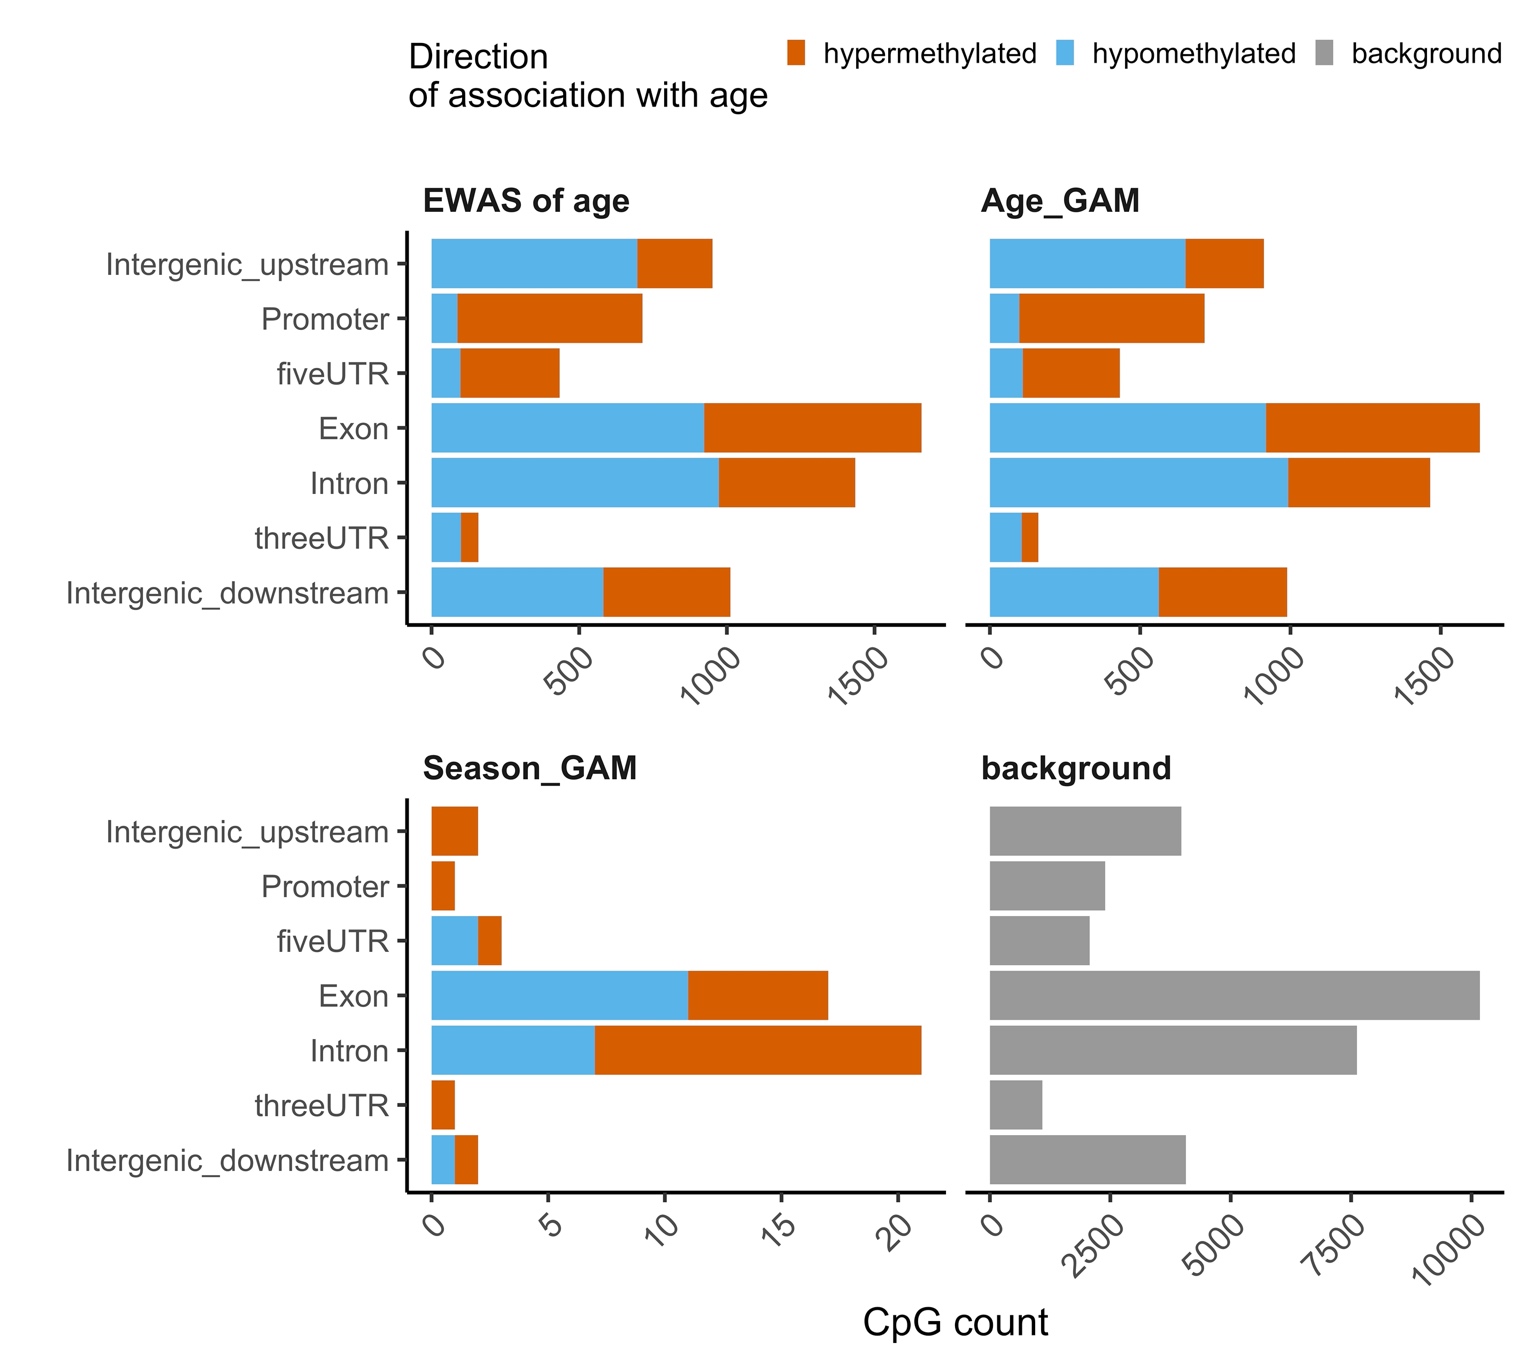
Figure S3. Location of CpG sites relative to the closest transcriptional start site. The CpG sites coordinates were estimated based on the alignment of Mammalian array probes to yellow-bellied marmot (*Marmota flaviventer*) genome assembly. A,B) CpGs associated with chronological age. C) CpGs associated with seasons (day of the year). D) Location of the Mammalian array probes mapped to the yellow-bellied marmot genome. The direction of associations with chronological age is highlighted (p < 10-5) with red for hypermethylated and blue for hypomethylated sites. Note that the season effect is cyclical, and we show the direction of association with chronological age for the active season.

Figure S4. Enrichment analysis of the top aging- and season related CpGs in yellow bellied marmots (*Marmota flaviventer*). The analysis was done using genomic region of enrichment annotation tool (GREAT). The gene level enrichment was done using human GRCh37 background. The background probes were limited to 19,695 probes that were mapped to the same gene in the marmot genome. The top 3 enriched datasets from each category (Canonical pathways, gene ontology, mouse phenotype, and upstream regulators) were selected and further filtered for significance at p < 10-5.
