# Supplementary material for: Hibernation slows epigenetic aging in yellow-bellied marmots
Source: Research Square preprint supplement (doi:10.21203/rs.3.rs-526409/v1), 2021-05-21
Supplement: Supplementary file 2 [file 7491628679cd05efacf1dc74.doc]

**List of supplementary files and its contents**

File: Figures_S1-S4.doc

Figure S1. Visualization of the simulated patterns of epigenetic aging.

Figure S2. Examples of CpG sites where methylation levels are non-linearly related with chronological age.

Figure S3. Location of CpG sites relative to the closest transcriptional start site.

Figure S4. Enrichment analysis of the top aging- and season related CpGs in yellow bellied marmots (*Marmota flaviventer*).

File: Tables_S1-S7.xls

Table S1. Average coefficient, average intercept and average minimum lambda from 11 Epigenetic Clock (EC) models generated with a 10-fold cross validation. These models were used to predict ages (epigenetic ages) used in the generalized additive modeling.

Table S2. Coefficient per site, intercept and minimum lambda from the EC using all data as the training set.

Table S3. Rate and intercept values per site from the Epigenetic Pacemaker (EPM) using all data as the training set.

Table S4. Output from the generalized additive mixed model using predicted age (EC) as dependent variable. Age: individual chronological age in years calculated from the first time an individual emerged from their mother’s burrow to the date they were captured. Date: day of the year (values varied from 1 to 365, with 1 representing 1 May and 365 representing 30 April).

Table S5. Results from epigenome-wide association studies of age (EWAS) of chronological age. Each row is the result of a model per site. Methylation level was the dependent variable and chronological age as independent variable.

Table S6. Results from Generalized Additive Models (GAM) per CpG site. Methylation level was the dependent variable. The independent variables were a cubic spline function for chronological age (Age) and a cyclic cubic spline function for day of year (Day of year).

Table S7. CpG site annotations. Column descriptions:

- Significant effect of Day of year (season) – whether the cyclic cubic spline function for day of year was significant (TRUE) or not (FALSE) in the GAM per CpG site.
- Significant effect of chronological age – whether the EWAS or the cubic spline function for chronological age in the GAMs were significant.
- Scaffold name – scaffold in the assembly of *M. flaviventer*
- Cgstart – Start location of the target CG.
- Cgend – Stop location of the target CG.
- Annotation – Detailed gene region of the alignment.
- Main categories – Gene region categories. Priorities: 5'UTR, 3'UTR, Exon, Intron, promoter, intergenic.

Files: TableS8_Enrichment_AGE.xls; TableS9_Enrichment_SEASON.xls; and TableS10_Enrichment_Ben-Hotch_SEASON.xls

These files include the output from the Genomic Regions Enrichment Tool (GREAT). Table S8 includes the enrichment analysis of the CpGs for which the EWAS or the cubic spline function for chronological age in the GAMs were significant. Table S9 includes the enrichment analysis for the CpGs for which the cyclic cubic spline function for day of year was significant in the GAMs. Table S10 is the result of a second enrichment analysis in a CpG site set selected using a less conservative false detection rate correction (Benjamini–Hochberg FDR) for the effect of day of year (cyclic cubic spline function).

File: SampleSheet_Pinho_etal2021.csv

Information per sample:

- OriginalOrderInBatch – order in which each sample was analyzed
- Basename – Sample identification
- Age – Age in years of individuals at sampling time
- AnimalID – Individual identification
- Trap_jday – Julian date of sample collection.
- Epigenetic_state – epigenetic age measured with the Epigenetic Pacemaker
- EC_predicted – epigenetic age measured with the Epigenetic clock
- pup_emerjdate – date of first burrow emergence after individuals were born

File: Code_Pinho_etal2021.R

All the R code used to analyze the samples.

File: Marmot_probes_sesame_normalized149.Rdata

Methylation levels for each CpG site in all samples. These values were estimated after normalization in SeSaMe.

File: EPM_SM.zip

All information and code to run the Epigenetic Pacemaker.
